# Supplementary material for: Structure-optimized sgRNA selection with PlatinumCRISPr for efficient Cas9 generation of knockouts
Source: HighWire-hosted journal article supplement (doi:10.1101/gr.279479.124), 2024-12-01
Supplement: Supplemental_code.tar.gz [file platinum_predictions_with_sub_rules.xlsx]

## Sheet: platinum_predictions_with_sub_r
guide	set	energy	scaled efficiency	prediction	Tetraloop	UUYY motif	UCYG, CYGR motif	51/40 and 52/41 base-pairing	Bulge Mimic	seed composition	GC content	Self Complementarity	Loop 2/3
GAACAGATGCTCATCGTGCAC	A) Ren X et al., 2014	-21.7	0.979121	high	high	high	high	high	high	high	high	high	high
GAGCGACACATACCGGCGCCC	A) Ren X et al., 2014	-24.7	0.781319	low	high	high	high	high	high	low	high	high	high
GCAATATGGACATCTTTGGGG	A) Ren X et al., 2014	-24.4	0.797802	low	high	high	high	low	high	high	high	high	high
GCACCTATGCCTGGCACAATA	A) Ren X et al., 2014	-24.1	0.367033	low	low	high	high	high	high	low	high	high	low
GCAGAAACGATCACGATGATT	A) Ren X et al., 2014	-25.8	0	low	low	high	high	high	high	low	low	low	low
GCAGCAGGATGACCTCTTTAT	A) Ren X et al., 2014	-25.5	0.564835	low	high	high	high	low	high	low	high	high	high
GCAGGAGCTATTAATTCGCGG	A) Ren X et al., 2014	-22.3	0.58022	high	high	high	high	high	high	high	high	high	high
GCATTAACCAGGGCTTCGGGC	A) Ren X et al., 2014	-26.1	0.810989	high	high	high	high	high	high	high	high	high	high
GCCAAAAACTACGGCACGCTC	A) Ren X et al., 2014	-26.2	0.764835	low	low	high	high	high	high	high	high	high	low
GCCACAATTGTCGATCGTCAA	A) Ren X et al., 2014	-21.5	0.334066	low	high	high	high	high	high	low	high	high	high
GCCCAGTCCGCCGGAGGACTC	A) Ren X et al., 2014	-26.8	0.695604	high	high	high	high	high	high	high	high	high	high
GCCGGCCACCCAGTCCGCCGG	A) Ren X et al., 2014	-26.2	0.265934	low	high	high	high	high	high	low	low	high	high
GCCGTTAGGGAGCCGATAAAG	A) Ren X et al., 2014	-24.1	0.39011	low	low	high	high	high	high	low	high	high	high
GCCTCCGGCGGACTGGGTGGC	A) Ren X et al., 2014	-34.5	0.782418	high	high	high	high	high	high	high	high	high	high
GCGCCGGAGGACTCCGGTTCA	A) Ren X et al., 2014	-27.5	0.1	low	high	high	high	high	high	low	high	high	high
GCTGCAACGAGCGACACATAC	A) Ren X et al., 2014	-22.1	0.158242	low	high	high	high	high	high	low	high	high	high
GCTGCGGCGATCGAAAGGCAA	A) Ren X et al., 2014	-24	0.528571	low	high	high	high	high	high	low	high	high	high
GGAACCGGGCAGCCCGCCTCC	A) Ren X et al., 2014	-29.1	1	high	high	high	high	high	high	high	high	high	high
GGCACAATATGGACATCTTTG	A) Ren X et al., 2014	-26.1	0.381319	low	low	high	high	low	high	low	low	high	high
GGCACCATGGCTTGGAAAATC	A) Ren X et al., 2014	-26.3	0.0307692	low	low	high	high	high	high	low	high	high	low
GGCGATATAGTTGGAGCCAGC	A) Ren X et al., 2014	-26.8	0.968132	high	high	high	high	high	high	high	high	high	high
GGCTCCGGCCACCCAGTCCGC	A) Ren X et al., 2014	-27.2	0.6	high	high	high	high	high	high	high	high	high	high
GGCTGCATTAACCAGGGCTTC	A) Ren X et al., 2014	-24.8	0.605495	high	high	high	high	high	high	high	high	high	high
GGCTGCTGCTCCTCGAAGATG	A) Ren X et al., 2014	-22.9	0.176923	low	low	high	high	high	high	low	high	high	low
GGGCACAATATGGACATCTTT	A) Ren X et al., 2014	-29.9	0.473626	low	high	low	high	low	high	low	low	high	high
GGTGCACTGTTCCAGGACAAA	A) Ren X et al., 2014	-24.5	0.0197802	low	low	high	high	high	high	low	high	high	high
GTAGTTGGCCGCTCCCTGAAC	A) Ren X et al., 2014	-22.2	0.256044	low	high	high	high	high	high	low	high	high	high
GTATTCGTCACTGTTCCCCGC	A) Ren X et al., 2014	-20.8	0.737363	low	low	high	high	high	high	low	high	high	low
GTCGCAGAGCTGCATTAACCA	A) Ren X et al., 2014	-22	0.547253	low	low	high	high	high	high	low	high	high	low
GTCTGTTCATCATCACGCACC	A) Ren X et al., 2014	-21.8	0.953846	low	low	high	high	high	high	high	high	high	low
GTGTGGTGAATGCGGTTCGCC	A) Ren X et al., 2014	-29	0.587912	high	high	high	high	high	high	high	high	high	high
GTTATCGGCTCCCTAACGGCC	A) Ren X et al., 2014	-25.9	0.685714	high	high	high	high	high	high	high	high	high	high
GTTCGCAGAGCTGCATTAACC	A) Ren X et al., 2014	-21.5	0.489011	low	low	high	high	high	high	low	high	high	low
GTTCGGCGGTGCCATTAACCA	A) Ren X et al., 2014	-24.5	0.557143	low	high	high	high	high	high	low	high	high	high
GTTCGGGCAGGCCAAAAACTA	A) Ren X et al., 2014	-28	0.454945	low	high	high	high	high	high	low	high	high	high
GTTCTTGAGCAAATGTTTCCT	A) Ren X et al., 2014	-24	0.296703	low	low	high	high	high	high	low	low	high	low
GTTGAAACTCAGTTTGCGGCG	A) Ren X et al., 2014	-24.1	0.956044	low	high	high	high	high	low	low	high	high	low
GTTGGGCTGCTTACAAACTTC	A) Ren X et al., 2014	-25.6	0.228571	low	high	high	high	high	high	low	high	high	high
GTTTTGGCCTGCCCGAAGCCC	A) Ren X et al., 2014	-25	0.708791	high	high	high	high	high	high	high	high	high	high
GATCATTGCGTTCAGCGAGC	B) Varshney GK et al., 2015	-23.3	0.5789	high	high	high	high	high	high	high	high	high	high
GGAAACCTCAGCACTCCTGA	B) Varshney GK et al., 2015	-23.1	0.3393	low	low	high	high	high	high	low	high	high	low
GGAAGACATGATCCGGCTGG	B) Varshney GK et al., 2015	-26.5	0.8235	high	high	high	high	high	high	high	high	high	high
GGAAGAGAGTGTCGCCACTC	B) Varshney GK et al., 2015	-25.1	0.2353	low	low	high	high	high	high	high	high	low	low
GGAAGCTATAGCCGGGACCA	B) Varshney GK et al., 2015	-26.2	0.4286	low	low	high	high	low	high	high	high	high	high
GGAAGGTGGAGAATGGTGTG	B) Varshney GK et al., 2015	-27.8	0.3571	low	low	high	high	low	high	high	high	high	low
GGAAGTGCTGTAGCAGAACT	B) Varshney GK et al., 2015	-23.1	0.0476	low	low	high	high	low	high	low	high	high	low
GGAAGTTGGCCAGCACTCTG	B) Varshney GK et al., 2015	-27.2	0.3929	low	low	high	high	low	high	low	high	high	low
GGAATCACAGCCATAGAGCT	B) Varshney GK et al., 2015	-23.9	0	low	high	high	high	high	high	low	high	high	high
GGAATCATAGGTCTGTCTGG	B) Varshney GK et al., 2015	-26.4	0.3333	high	high	high	high	high	high	high	high	high	high
GGACAGAGCGCTGGAGAGAA	B) Varshney GK et al., 2015	-25.3	0.4464	low	low	high	high	high	high	low	high	high	high
GGACAGCTAATTCTTCCTCC	B) Varshney GK et al., 2015	-26.7	0.6429	low	low	high	high	high	high	high	high	high	high
GGACAGTCCTGCCGAGGTGG	B) Varshney GK et al., 2015	-28.5	1	high	high	high	high	high	high	high	high	high	high
GGACCACAGATCTCACAGGC	B) Varshney GK et al., 2015	-22	0.4286	high	high	high	high	high	high	high	high	high	high
GGACCAGTACAACACTAACG	B) Varshney GK et al., 2015	-24.5	0.7324	low	high	high	high	high	high	low	high	high	high
GGACCCTGAAGATACCGCTC	B) Varshney GK et al., 2015	-23.7	0.5	low	low	high	high	high	high	high	high	high	high
GGACGGAGAGAAAAACATCC	B) Varshney GK et al., 2015	-24.2	0.3182	low	high	high	high	high	high	low	high	high	high
GGAGACAGGCCGCAGCTCGT	B) Varshney GK et al., 2015	-27.4	0.6327	high	high	high	high	high	high	high	high	high	high
GGAGATGTGGCGCTCAGGGG	B) Varshney GK et al., 2015	-24.6	0.45	high	high	high	high	high	high	high	high	high	high
GGAGCAGGCCGAGTTTGCAG	B) Varshney GK et al., 2015	-25.5	0.0667	low	high	high	high	high	high	low	high	high	high
GGAGGAAACGCTGATTGTCC	B) Varshney GK et al., 2015	-25.2	0.3544	low	high	high	high	high	high	low	high	high	high
GGAGGACACATTGATGGAGG	B) Varshney GK et al., 2015	-25.3	0.0851	low	low	high	high	low	high	high	high	high	high
GGAGGAGAGAGTAGAACCAC	B) Varshney GK et al., 2015	-25.2	0.45	low	high	high	high	high	high	low	high	high	high
GGAGGCTCTGTGCTCCTACC	B) Varshney GK et al., 2015	-25	0.3061	low	low	high	high	high	high	high	high	high	low
GGAGGTGTTGGCGGTAGTGA	B) Varshney GK et al., 2015	-28.9	0.6667	low	high	high	high	high	high	low	high	high	low
GGAGGTTGTCTGGAAGCTCC	B) Varshney GK et al., 2015	-29.5	0.4348	low	high	high	high	high	high	high	high	high	low
GGAGTCCTGAAGGAGGACGA	B) Varshney GK et al., 2015	-27.8	0.7368	low	low	high	high	high	high	high	high	high	low
GGATCAAGTCTTCCCTGCTG	B) Varshney GK et al., 2015	-25.7	0.1429	high	high	high	high	high	high	high	high	high	high
GGATCTGGGCATACGGGATC	B) Varshney GK et al., 2015	-25.3	0.3409	high	high	high	high	high	high	high	high	high	high
GGATGCCGATGCAATCTTAC	B) Varshney GK et al., 2015	-23.8	0.1395	low	high	high	high	high	high	low	high	high	high
GGATGGGCTCGGAGTCCCAC	B) Varshney GK et al., 2015	-29.3	0	high	high	high	high	high	high	high	high	high	high
GGATGTGAGCGGCAGCGGGA	B) Varshney GK et al., 2015	-29.2	0.2143	high	high	high	high	high	high	high	high	high	high
GGCACCGATTTCTGCTAAGT	B) Varshney GK et al., 2015	-27.2	0	low	high	high	high	high	high	low	high	high	low
GGCAGAGGCTTCTTCTCTTC	B) Varshney GK et al., 2015	-21.9	0.1132	low	high	high	high	high	high	low	high	high	high
GGCAGATGACCTCATTATCC	B) Varshney GK et al., 2015	-25.5	0.0476	low	high	high	high	high	high	low	high	high	high
GGCAGCAGCAGATGCAGAAG	B) Varshney GK et al., 2015	-22	0.06	low	high	high	high	high	high	low	high	high	high
GGCAGCTCTGAACATGAAGC	B) Varshney GK et al., 2015	-26.6	0.1364	low	low	high	high	high	high	low	high	high	low
GGCAGGCCAACTTGTACAAT	B) Varshney GK et al., 2015	-24.2	0.0833	low	low	high	high	high	high	low	high	high	high
GGCAGTCTGTCGTGATGGCG	B) Varshney GK et al., 2015	-27.9	0	low	low	high	high	high	low	high	high	high	high
GGCAGTCTTTTGAAGGGTTT	B) Varshney GK et al., 2015	-23.7	0.5833	low	high	high	high	high	high	low	high	high	high
GGCCATGAAGAAGATCGGTC	B) Varshney GK et al., 2015	-23.1	0.2759	high	high	high	high	high	high	high	high	high	high
GGCCCAATGCAGGATTTTGT	B) Varshney GK et al., 2015	-23.8	0.119	low	high	high	high	high	high	low	high	high	high
GGCCCGCGCTGAAGCTCTGG	B) Varshney GK et al., 2015	-26.1	0.8718	low	low	high	high	high	high	high	high	high	low
GGCCCGTGATTCCAGAAGAG	B) Varshney GK et al., 2015	-21.9	0.2772	low	low	high	high	high	high	low	high	high	low
GGCCTGTTCCACTACTGCAT	B) Varshney GK et al., 2015	-23.9	0	low	low	high	high	high	high	low	high	high	high
GGCGTCAGCAACATTTTCGG	B) Varshney GK et al., 2015	-24.1	0	low	low	high	high	high	high	low	high	high	low
GGCGTCCCTACTTGTGCTAC	B) Varshney GK et al., 2015	-23.8	0.0707	low	low	high	high	high	high	low	high	high	low
GGCTATGACGGCTTCTTCTT	B) Varshney GK et al., 2015	-32	0.3214	low	high	low	high	low	high	low	high	high	high
GGCTCCAATCTCAGCCAAGC	B) Varshney GK et al., 2015	-24.6	0.1064	high	high	high	high	high	high	high	high	high	high
GGCTCCAGCGGTCACTCAAG	B) Varshney GK et al., 2015	-24.1	0.4615	low	high	high	high	high	high	low	high	high	high
GGCTCCATTCTTATCCTGAC	B) Varshney GK et al., 2015	-21.2	0.4762	low	low	high	high	high	high	high	high	high	high
GGCTGATGGGAAGACGGAGG	B) Varshney GK et al., 2015	-27.7	0.3333	low	low	high	high	low	high	high	high	high	high
GGCTGCCAGGTTTGGCCATG	B) Varshney GK et al., 2015	-28	0.878	high	high	high	high	high	high	high	high	high	high
GGCTGTCTGTCCGGGCTGAG	B) Varshney GK et al., 2015	-27.7	0.8462	high	high	high	high	high	high	high	high	high	high
GGCTGTTGAGAAAGAAAGTG	B) Varshney GK et al., 2015	-22.4	0.1455	low	low	high	high	high	low	low	high	high	low
GGCTTTTTCGGAGGGTCTGT	B) Varshney GK et al., 2015	-30.8	0.375	low	high	high	high	high	high	low	high	high	low
GGGAGCACTTTATGCTCAGC	B) Varshney GK et al., 2015	-25.1	0.0952	high	high	high	high	high	high	high	high	high	high
GGGCACTAATGAGGCGGTGC	B) Varshney GK et al., 2015	-26.7	0.33	low	high	high	high	high	high	high	high	high	low
GGGCATTTTGACTGTGAACA	B) Varshney GK et al., 2015	-23.9	0.14	low	low	high	high	high	high	low	high	high	low
GGGCCGTGAGTTAGTGCCTG	B) Varshney GK et al., 2015	-27.9	0.381	high	high	high	high	high	high	high	high	high	high
GGGCGACTCTTCTGTGCAGC	B) Varshney GK et al., 2015	-23.5	0.0476	high	high	high	high	high	high	high	high	high	high
GGGGCTCTGCGTCCTGGAGC	B) Varshney GK et al., 2015	-27.2	0.2308	low	low	high	high	high	high	high	high	high	low
GGGGCTGTTGACATCGATGA	B) Varshney GK et al., 2015	-23.3	0.5357	low	high	high	high	high	high	low	high	high	high
GGGGTGAAAAAGTAAGACGG	B) Varshney GK et al., 2015	-21.6	0	high	high	high	high	high	high	high	high	high	high
GGGTCGTGATTTTGTTCAGA	B) Varshney GK et al., 2015	-21	0	low	high	high	high	high	high	low	high	high	high
GGGTGTTGGTCCAGGCCAGG	B) Varshney GK et al., 2015	-29.6	0.54	high	high	high	high	high	high	high	high	high	high
GGGTTACGGTCACAACGACG	B) Varshney GK et al., 2015	-24.9	0.093	high	high	high	high	high	high	high	high	high	high
GGGTTTGGTTCTGTAATCAA	B) Varshney GK et al., 2015	-25.2	0.3	low	low	high	high	high	high	low	low	high	low
GGTAAGCTGTTCCTGGAAGG	B) Varshney GK et al., 2015	-23.7	0.6818	high	high	high	high	high	high	high	high	high	high
GGTACGGTTTGCATCCGGAG	B) Varshney GK et al., 2015	-25.5	0.3714	high	high	high	high	high	high	high	high	high	high
GGTACTTATTGTAGTCCTCT	B) Varshney GK et al., 2015	-25.8	0.6129	low	high	high	high	high	high	low	low	high	high
GGTAGAAGCTGTCGTAGATG	B) Varshney GK et al., 2015	-23.3	0	low	low	high	high	high	high	low	high	low	low
GGTAGAGAACGGTCAGCTGG	B) Varshney GK et al., 2015	-32.9	0.2857	low	high	high	high	high	high	high	high	high	low
GGTAGATCTGAATCATGTGA	B) Varshney GK et al., 2015	-22	0.4	low	low	high	high	high	high	low	low	high	low
GGTAGATCTTGGCAGCCTCT	B) Varshney GK et al., 2015	-31.2	0.3333	high	high	high	high	high	high	high	high	high	high
GGTATTTCACCATCCATGGA	B) Varshney GK et al., 2015	-21.9	0	low	high	high	high	high	high	low	high	high	high
GGTCAACCTCATCAACTACC	B) Varshney GK et al., 2015	-21.4	0.0143	low	high	high	high	high	high	low	high	high	high
GGTCACAGTGACGATTCCTC	B) Varshney GK et al., 2015	-26.6	0.6154	low	high	high	high	high	high	low	high	high	high
GGTCAGTGTCTGAGGTATCC	B) Varshney GK et al., 2015	-21.5	0.0217	low	low	high	high	high	high	low	high	high	low
GGTCATGCTGATTCGCCTGA	B) Varshney GK et al., 2015	-29.5	0.0952	high	high	high	high	high	high	high	high	high	high
GGTCATGGTTTATGTCGTAG	B) Varshney GK et al., 2015	-26.6	0.381	low	high	high	high	high	high	low	high	high	high
GGTCATGTTCGTGTGCACGA	B) Varshney GK et al., 2015	-23.1	0.4545	high	high	high	high	high	high	high	high	high	high
GGTCGGCAGAAACTGGCCAT	B) Varshney GK et al., 2015	-33.6	0.4286	high	high	high	high	high	high	high	high	high	high
GGTCTCAGGCCCATTCCTCC	B) Varshney GK et al., 2015	-23.6	0.1176	high	high	high	high	high	high	high	high	high	high
GGTCTGATGGCATCAAACAA	B) Varshney GK et al., 2015	-23.3	0.6327	low	low	high	high	low	high	low	high	high	high
GGTGAACGGGTCGGTTCCAC	B) Varshney GK et al., 2015	-28	0.3571	low	high	high	high	high	high	low	high	high	high
GGTGAGTCAGTTCACTCCAG	B) Varshney GK et al., 2015	-22.3	0.5238	low	low	high	high	high	high	high	high	high	low
GGTGCTCATGTTCACAGATA	B) Varshney GK et al., 2015	-20.5	0	low	low	high	high	low	high	low	high	high	low
GGTGCTGGAGCAGTACGTGG	B) Varshney GK et al., 2015	-27.6	0.5625	high	high	high	high	high	high	high	high	high	high
GGTGCTGGAGGAGGCTTCGG	B) Varshney GK et al., 2015	-29.8	0.1143	high	high	high	high	high	high	high	high	high	high
GGTGGAGTCGTTTGCGAATA	B) Varshney GK et al., 2015	-23.6	0.4146	low	low	high	high	low	high	low	high	high	low
GGTGGCACCTCAAGAGATTC	B) Varshney GK et al., 2015	-21.7	0.0476	low	low	high	high	high	high	low	high	high	low
GGTGTAGTCAGTATTAGGAG	B) Varshney GK et al., 2015	-23.2	0.5	low	high	high	high	high	high	low	high	high	high
GGTTCTGCTGTCTCCACCAG	B) Varshney GK et al., 2015	-22.6	0.125	low	low	high	high	high	high	high	high	high	low
GGTTGAAGCTCGACATGAGC	B) Varshney GK et al., 2015	-26.7	0	low	high	high	high	high	high	low	high	high	low
GGTTGACCAGATACGTGCAC	B) Varshney GK et al., 2015	-24.6	0.2	low	high	high	high	high	high	high	high	high	low
GGTTGCTCAAAAGTGAGGAG	B) Varshney GK et al., 2015	-22.5	0	low	low	high	high	high	high	high	high	high	low
GGTTGTGTTCGCTGCGAAAG	B) Varshney GK et al., 2015	-22.9	0.1212	low	high	high	high	high	high	low	high	high	low
GGTTTAGGAGTGTGTCCCGC	B) Varshney GK et al., 2015	-26.5	0.3333	high	high	high	high	high	high	high	high	high	high
GGTTTCTGTTAGAGGCTCTT	B) Varshney GK et al., 2015	-27	0.098	low	low	low	high	high	high	low	high	high	low
GGTTTGGGGATGTGGCCAGC	B) Varshney GK et al., 2015	-30.6	0	high	high	high	high	high	high	high	high	high	high
GGTTTTCTTCTTCTACCCTC	B) Varshney GK et al., 2015	-23.6	0.0588	high	high	high	high	high	high	high	high	high	high
GGAAAAAGAGGGCTGCGTCT	C) Moreno Mateos MA et al., 2015	-30.6	0.219272	high	high	high	high	high	high	high	high	high	high
GGAAAAAGCCGGCGTAGTCC	C) Moreno Mateos MA et al., 2015	-28.1	0.510324	low	high	high	high	high	high	low	high	high	high
GGAAAAAGCTCGTCTTGAAG	C) Moreno Mateos MA et al., 2015	-23.5	0.298918	low	high	high	high	high	high	low	high	high	high
GGAAAACAAATAGATGTCAA	C) Moreno Mateos MA et al., 2015	-21.8	0.754179	low	high	high	high	high	high	low	low	high	high
GGAAAACAGCTTACTTGTGA	C) Moreno Mateos MA et al., 2015	-25.2	0.25762	low	low	high	high	high	high	low	low	high	high
GGAAAAGAAACTGCGTAAGG	C) Moreno Mateos MA et al., 2015	-21.2	0.394297	low	high	high	high	high	high	low	high	high	high
GGAAACAGAGACCCTGGGCT	C) Moreno Mateos MA et al., 2015	-26.2	0.273353	high	high	high	high	high	high	high	high	high	high
GGAAACAGCCATCAGAGCTG	C) Moreno Mateos MA et al., 2015	-23.9	0.213373	high	high	high	high	high	high	high	high	high	high
GGAAACCATCTCCATCTCAA	C) Moreno Mateos MA et al., 2015	-22.4	0.0176991	low	low	high	high	high	high	low	high	high	low
GGAAACCCTAGGAGAACATT	C) Moreno Mateos MA et al., 2015	-24	0.214356	low	high	high	high	high	high	low	high	high	high
GGAAACTGCCCTGGTTTTGT	C) Moreno Mateos MA et al., 2015	-25.9	0.0462144	low	low	high	high	high	high	low	high	high	high
GGAAAGAGCTTCAGCCAATC	C) Moreno Mateos MA et al., 2015	-23.4	0.13176	low	high	high	high	high	high	low	high	high	high
GGAAAGAGGGATGGAGGTGA	C) Moreno Mateos MA et al., 2015	-27.3	0.522124	low	high	high	high	high	high	low	high	high	high
GGAAAGAGTGCTTGAGAGGT	C) Moreno Mateos MA et al., 2015	-23	0.913471	low	low	high	high	high	high	low	high	high	low
GGAAAGCAGAGCAAGGCAAA	C) Moreno Mateos MA et al., 2015	-24.1	0.264503	low	high	high	high	high	high	low	high	high	high
GGAAAGCAGCAGGGCAAGGA	C) Moreno Mateos MA et al., 2015	-24.5	0.0806293	low	high	high	high	high	high	low	high	high	high
GGAAAGTGCTTCACTCAATC	C) Moreno Mateos MA et al., 2015	-21.8	0.112094	low	high	high	high	high	high	low	high	high	high
GGAAATTGTTGTATTAGGAA	C) Moreno Mateos MA et al., 2015	-23.1	0.079646	low	low	high	high	high	high	low	low	high	low
GGAACAACATTAATCATTTA	C) Moreno Mateos MA et al., 2015	-19.8	0.320551	low	low	high	high	high	high	low	low	high	high
GGAACACAAAACACAGAGAG	C) Moreno Mateos MA et al., 2015	-20.3	0.20354	low	low	high	high	low	high	low	high	high	high
GGAACAGAAGCCTACATTTA	C) Moreno Mateos MA et al., 2015	-24.4	0.249754	low	low	high	high	high	high	low	low	high	high
GGAACAGGAATTTACATTTC	C) Moreno Mateos MA et al., 2015	-20.5	0.115044	low	high	high	high	low	high	low	low	high	high
GGAACAGGCTCTGCCCAACA	C) Moreno Mateos MA et al., 2015	-26.5	0.650934	low	high	high	high	high	high	low	high	high	high
GGAACAGGCTGGGAACAGAT	C) Moreno Mateos MA et al., 2015	-26.1	0.792527	low	high	high	high	high	high	low	high	high	high
GGAACATCCTCTGTGCCCTG	C) Moreno Mateos MA et al., 2015	-24.8	0.963618	high	high	high	high	high	high	high	high	high	high
GGAACATTTGTGGTCGGCAA	C) Moreno Mateos MA et al., 2015	-22.9	0.702065	high	high	high	high	high	high	high	high	high	high
GGAACCACTCTTGCAGAAGA	C) Moreno Mateos MA et al., 2015	-23.5	0.182891	low	low	high	high	high	high	low	high	high	high
GGAACCAGTAGTAGAAAATG	C) Moreno Mateos MA et al., 2015	-22.4	0.313668	low	low	high	high	high	high	low	low	high	low
GGAACCCCACCTATGGCTCG	C) Moreno Mateos MA et al., 2015	-25.3	0.235005	low	low	high	high	high	high	high	high	high	low
GGAACCTGAGACTGAGCCAT	C) Moreno Mateos MA et al., 2015	-31.3	0.904621	low	high	high	high	high	high	low	high	high	high
GGAACCTGTCCTGTGACCTC	C) Moreno Mateos MA et al., 2015	-24	0.190757	high	high	high	high	high	high	high	high	high	high
GGAACGAAGCAAAACTGCGG	C) Moreno Mateos MA et al., 2015	-22	0.133727	low	low	high	high	high	high	high	high	high	low
GGAACTACTCGCCGTATTCC	C) Moreno Mateos MA et al., 2015	-24.3	0.0196657	low	high	high	high	high	high	low	high	high	high
GGAACTCGTCCACAGACACC	C) Moreno Mateos MA et al., 2015	-23.3	0.358899	high	high	high	high	high	high	high	high	high	high
GGAACTGAGGAGCGCTATCA	C) Moreno Mateos MA et al., 2015	-23.8	0.0255654	low	low	high	high	high	high	low	high	high	low
GGAACTGGATTCTGTGCTGG	C) Moreno Mateos MA et al., 2015	-27.2	0.396264	high	high	high	high	high	high	high	high	high	high
GGAACTGGCTAATGTGGAGC	C) Moreno Mateos MA et al., 2015	-26.6	0.716814	high	high	high	high	high	high	high	high	high	high
GGAACTGTGGTCAAAGGATT	C) Moreno Mateos MA et al., 2015	-24.4	0.619469	low	high	high	high	high	high	low	high	high	high
GGAACTTTCCTCAACAAGTA	C) Moreno Mateos MA et al., 2015	-22.5	0.0599803	low	high	high	high	high	low	low	low	high	high
GGAAGAACAGAGTGTCTACT	C) Moreno Mateos MA et al., 2015	-25.7	0.103245	low	high	high	high	low	high	low	high	high	high
GGAAGAAGAAACTGTGGAGG	C) Moreno Mateos MA et al., 2015	-21.4	0.691249	low	low	high	high	high	high	high	high	high	high
GGAAGAATATTTCCAGTTTG	C) Moreno Mateos MA et al., 2015	-24.7	0.474926	low	high	high	high	high	high	low	low	high	high
GGAAGACAATCCCTGACCAG	C) Moreno Mateos MA et al., 2015	-22.5	0.480826	high	high	high	high	high	high	high	high	high	high
GGAAGACATCACAGCACAGT	C) Moreno Mateos MA et al., 2015	-24	0.027532	low	high	high	high	high	high	low	high	high	high
GGAAGACCAGGGCAAGCAGG	C) Moreno Mateos MA et al., 2015	-30.3	0.851524	high	high	high	high	high	high	high	high	high	high
GGAAGACCGGCTAAGGAGGT	C) Moreno Mateos MA et al., 2015	-27.2	0.943953	high	high	high	high	high	high	high	high	high	high
GGAAGACGAGGAGATTGATG	C) Moreno Mateos MA et al., 2015	-23.6	0.0127827	low	low	high	high	high	high	low	high	high	low
GGAAGACTGGAGAGTTTATC	C) Moreno Mateos MA et al., 2015	-26.3	0.508358	low	high	high	high	high	high	low	high	high	high
GGAAGAGGAGGTAATAATGG	C) Moreno Mateos MA et al., 2015	-22.3	0.493609	low	low	high	high	low	high	low	high	high	low
GGAAGAGGCGGTGGAGGGGG	C) Moreno Mateos MA et al., 2015	-26.3	0.842675	high	high	high	high	high	high	high	high	high	high
GGAAGAGGTGGAGGTGGGGG	C) Moreno Mateos MA et al., 2015	-24.8	0.328417	high	high	high	high	high	high	high	high	high	high
GGAAGATCAACAGCCGTGAA	C) Moreno Mateos MA et al., 2015	-25.2	0.660767	low	high	high	high	high	high	low	high	high	high
GGAAGCAGGGTCGCAAAACC	C) Moreno Mateos MA et al., 2015	-23.3	0.232055	low	high	high	high	high	high	low	high	high	high
GGAAGCGGCAGGTCGGTTTG	C) Moreno Mateos MA et al., 2015	-27.2	0.911504	low	high	high	high	high	high	low	high	high	high
GGAAGCTCGGCGTGTGGACG	C) Moreno Mateos MA et al., 2015	-25.1	0.0226155	low	low	high	high	high	high	high	high	high	low
GGAAGCTGCTGGCGGTCATG	C) Moreno Mateos MA et al., 2015	-28.7	0.795477	low	low	high	high	low	high	low	high	high	low
GGAAGCTTTGCTACGTCAAG	C) Moreno Mateos MA et al., 2015	-25	0.321534	low	low	high	high	high	high	low	high	high	high
GGAAGGAGGAGTCTCTGGTA	C) Moreno Mateos MA et al., 2015	-25.4	0.465093	low	high	high	high	high	low	low	high	high	high
GGAAGGCATCTGCGGGAATG	C) Moreno Mateos MA et al., 2015	-25.7	0.887906	low	low	high	high	low	high	low	high	high	low
GGAAGGGAGACGGCGTTTTT	C) Moreno Mateos MA et al., 2015	-27.8	0.368732	low	high	low	high	low	high	low	high	high	high
GGAAGGGTTTGTGGCCGGTG	C) Moreno Mateos MA et al., 2015	-28.9	0.830875	low	high	high	high	high	low	high	high	high	high
GGAAGGTGACCCTCTATGCT	C) Moreno Mateos MA et al., 2015	-28.1	0.347099	low	high	high	high	high	high	low	high	high	high
GGAAGGTGCGCTGGCAGGAC	C) Moreno Mateos MA et al., 2015	-26.2	0.606686	high	high	high	high	high	high	high	high	high	high
GGAAGTGAGCGTGCAGAGAA	C) Moreno Mateos MA et al., 2015	-23.5	0.801377	low	high	high	high	high	high	low	high	high	high
GGAAGTTCACTAGAATCTGT	C) Moreno Mateos MA et al., 2015	-23.6	0.337266	low	high	high	high	high	high	low	low	high	high
GGAAGTTCTGCTGCTGCGCT	C) Moreno Mateos MA et al., 2015	-25.4	0.291052	low	high	high	high	high	high	high	high	high	low
GGAAGTTTCGCCGGGCCACA	C) Moreno Mateos MA et al., 2015	-26.8	0.372665	low	low	high	high	high	high	high	high	high	low
GGAATCAGAGTGCTGGTCCA	C) Moreno Mateos MA et al., 2015	-27.5	0.972468	high	high	high	high	high	high	high	high	high	high
GGAATGACACCTGGAGCTGC	C) Moreno Mateos MA et al., 2015	-26.1	0.0983284	high	high	high	high	high	high	high	high	high	high
GGAATGAGCTGCAAGATGTT	C) Moreno Mateos MA et al., 2015	-24.9	0.411013	low	high	high	high	high	high	low	high	high	high
GGAATGCGTGATCCCAGACT	C) Moreno Mateos MA et al., 2015	-23.5	0.19764	low	low	high	high	high	high	low	high	high	high
GGAATGGAGTGAGAAAGAGA	C) Moreno Mateos MA et al., 2015	-23.3	0.3412	low	high	high	high	high	high	low	high	high	high
GGAATGGCTCCTCTTGGGTT	C) Moreno Mateos MA et al., 2015	-28.4	0.453294	low	high	high	high	high	high	low	high	high	high
GGAATGGGATAAAACCAGTT	C) Moreno Mateos MA et al., 2015	-24.7	0.528024	low	high	high	high	low	high	low	low	high	high
GGAATTCCACTGACAAGCAG	C) Moreno Mateos MA et al., 2015	-26.5	0.0245821	low	high	high	high	high	high	low	high	high	high
GGAATTGCGAATTATAAAAC	C) Moreno Mateos MA et al., 2015	-21.1	0.189774	low	high	high	high	high	high	low	low	high	high
GGAATTGGAGTCTGTCAGTT	C) Moreno Mateos MA et al., 2015	-25.8	0.164208	low	high	high	high	high	high	low	high	high	high
GGACAAACGAGCCGCCACAT	C) Moreno Mateos MA et al., 2015	-26.9	0.672566	low	high	high	high	high	high	low	high	high	high
GGACAAAGAAGGGGAGAAAC	C) Moreno Mateos MA et al., 2015	-23	0.0825959	low	low	high	high	high	high	low	high	high	high
GGACAACATGGCAGTTTTTC	C) Moreno Mateos MA et al., 2015	-25	0.0511308	low	high	high	high	low	high	low	high	high	high
GGACAAGTCCAAAGAGTCCA	C) Moreno Mateos MA et al., 2015	-25.2	0.573255	low	high	high	high	high	high	low	high	high	high
GGACAAGTTGGTTCTTACGC	C) Moreno Mateos MA et al., 2015	-25.7	0.369715	low	high	high	high	high	high	low	high	high	low
GGACAAGTTTCCGGTAGGCT	C) Moreno Mateos MA et al., 2015	-28.2	0.927237	low	high	high	high	high	high	low	high	high	low
GGACACCAGGTGGCCCTTGG	C) Moreno Mateos MA et al., 2015	-27.9	0.977384	high	high	high	high	high	high	high	high	high	high
GGACACCGTGTTGGTGGTGG	C) Moreno Mateos MA et al., 2015	-25.6	0.94002	low	high	high	high	high	high	high	high	high	low
GGACACTGAACAGGGATTTC	C) Moreno Mateos MA et al., 2015	-23.8	0.12881	low	low	high	high	high	high	low	high	high	high
GGACACTGGGCAATGGGGTG	C) Moreno Mateos MA et al., 2015	-28.5	0.804326	low	low	high	high	low	low	high	high	high	high
GGACAGCATGGCGGTGAGTC	C) Moreno Mateos MA et al., 2015	-28.4	0.603736	low	high	high	low	high	high	low	high	high	high
GGACAGGGAATCCTCTCTAA	C) Moreno Mateos MA et al., 2015	-25.5	0.237955	low	high	high	high	high	high	low	high	low	high
GGACAGGGACCCACGAGAGC	C) Moreno Mateos MA et al., 2015	-23.6	0.309735	high	high	high	high	high	high	high	high	high	high
GGACAGTGAACACAACTTCT	C) Moreno Mateos MA et al., 2015	-26.6	0.118977	low	low	high	high	high	high	low	high	high	high
GGACAGTGAAGGTGCGCCTG	C) Moreno Mateos MA et al., 2015	-28.8	0.953786	high	high	high	high	high	high	high	high	high	high
GGACATACCGATGGCCAGCA	C) Moreno Mateos MA et al., 2015	-27.6	0.429695	low	high	high	high	high	low	high	high	high	high
GGACATCAGCTTCTTCAACC	C) Moreno Mateos MA et al., 2015	-25.2	0.73943	low	high	high	high	high	high	low	high	high	high
GGACATCCACCATTTCTTTT	C) Moreno Mateos MA et al., 2015	-24	0.0235988	low	high	low	high	high	high	low	low	high	high
GGACATGGTTGAAACTCTCC	C) Moreno Mateos MA et al., 2015	-25.3	0.132743	low	low	high	high	high	high	high	high	high	high
GGACATGTCTGGGCAGCTGT	C) Moreno Mateos MA et al., 2015	-31.2	0.086529	low	high	high	high	high	high	low	high	high	high
GGACCACACTCCACTGGAAG	C) Moreno Mateos MA et al., 2015	-25.1	0.178958	low	high	high	high	high	high	low	high	high	high
GGACCACAGTATCCCACCAT	C) Moreno Mateos MA et al., 2015	-24.4	0.907571	low	high	high	high	high	high	low	high	high	high
GGACCATCACCCATGGGCAT	C) Moreno Mateos MA et al., 2015	-26.7	0.629302	high	high	high	high	high	high	high	high	high	high
GGACCATTGTGTGCTGCTGG	C) Moreno Mateos MA et al., 2015	-25.4	0.442478	high	high	high	high	high	high	high	high	high	high
GGACCCAGGAACCGTAGGTG	C) Moreno Mateos MA et al., 2015	-25.5	0.542773	low	low	high	high	high	low	low	high	high	high
GGACCCGCACTCGCAATATC	C) Moreno Mateos MA et al., 2015	-23.7	0.0845624	low	high	high	high	high	high	low	high	high	high
GGACCCGCTGTTCTACGGGA	C) Moreno Mateos MA et al., 2015	-25.3	0.229105	high	high	high	high	high	high	high	high	high	high
GGACCTCAGCAAGCAGTAAC	C) Moreno Mateos MA et al., 2015	-23.7	0.129794	low	low	high	high	high	high	low	high	high	high
GGACCTCCACAAGGTTTGTT	C) Moreno Mateos MA et al., 2015	-24	0.356932	low	high	high	high	high	high	low	high	high	high
GGACCTGAGAGAAGTGGCCC	C) Moreno Mateos MA et al., 2015	-28.2	0.561455	high	high	high	high	high	high	high	high	high	high
GGACCTGCCGGGGACACAGC	C) Moreno Mateos MA et al., 2015	-27.7	0.567355	high	high	high	high	high	high	high	high	high	high
GGACGAAAACGCGGAGTGCG	C) Moreno Mateos MA et al., 2015	-27.3	0.633235	high	high	high	high	high	high	high	high	high	high
GGACGAAGCCTCGGTCTTGG	C) Moreno Mateos MA et al., 2015	-29.2	0.701082	low	low	high	high	high	high	low	high	high	high
GGACGACAGAGGAGGAGGTT	C) Moreno Mateos MA et al., 2015	-26.4	0.60177	low	high	high	high	high	high	low	high	high	high
GGACGATCGAGAGCCCCGAG	C) Moreno Mateos MA et al., 2015	-26.3	0.460177	low	low	high	high	high	high	high	high	high	high
GGACGCCATGAAGGACAAGG	C) Moreno Mateos MA et al., 2015	-25	0.710914	low	low	high	high	high	high	low	high	high	high
GGACGCTAATGTTGGATCCC	C) Moreno Mateos MA et al., 2015	-23.8	0.651917	high	high	high	high	high	high	high	high	high	high
GGACGGGATTCGGGACTTCG	C) Moreno Mateos MA et al., 2015	-26.8	0.552606	low	high	high	high	high	high	low	high	high	high
GGACGGGGCAGAAACAGACG	C) Moreno Mateos MA et al., 2015	-25.4	0.414946	high	high	high	high	high	high	high	high	high	high
GGACGGTGTGGAAGGAGGTT	C) Moreno Mateos MA et al., 2015	-27	0.408063	low	high	high	high	low	high	low	high	high	high
GGACGTCACCGGGTGGTTCT	C) Moreno Mateos MA et al., 2015	-28.2	0.483776	low	high	high	high	high	high	low	high	high	high
GGACGTTCCTGGTGAGGTGG	C) Moreno Mateos MA et al., 2015	-24.7	0.986234	low	low	high	high	high	high	high	high	high	high
GGACTCCGGGATGTTTTGGG	C) Moreno Mateos MA et al., 2015	-25.2	0.502458	low	low	high	high	high	high	low	high	low	low
GGACTCTCCTGTATCACTGG	C) Moreno Mateos MA et al., 2015	-25.7	0.767945	high	high	high	high	high	high	high	high	high	high
GGACTGACAATGGGGTTGTG	C) Moreno Mateos MA et al., 2015	-27.1	0.694199	low	high	high	high	high	high	low	high	high	high
GGACTGGAGAGGAGGGATGT	C) Moreno Mateos MA et al., 2015	-28	0.686332	low	high	high	high	high	high	low	high	high	high
GGACTGGAGATCCAGACCGT	C) Moreno Mateos MA et al., 2015	-30.3	0.371681	high	high	high	high	high	high	high	high	high	high
GGACTGGGCATCCAGGCAAA	C) Moreno Mateos MA et al., 2015	-28.1	0.900688	low	high	high	high	high	high	low	high	high	high
GGACTGGTGTTGGATTTAGG	C) Moreno Mateos MA et al., 2015	-30.3	0.809243	low	high	high	high	high	high	low	high	high	high
GGACTGGTTGAGTCCTGACG	C) Moreno Mateos MA et al., 2015	-30	0.816126	low	low	high	high	high	high	high	high	high	high
GGACTGTATCGACGCTGAAT	C) Moreno Mateos MA et al., 2015	-27.6	0.388397	low	high	high	high	high	high	low	high	high	high
GGACTGTCAGGCTGGTAGAA	C) Moreno Mateos MA et al., 2015	-26.6	0.46411	low	high	high	high	high	high	low	high	high	high
GGACTGTCATAATCCGATGC	C) Moreno Mateos MA et al., 2015	-24.6	0.514258	high	high	high	high	high	high	high	high	high	high
GGACTGTCGGATGACCTTTG	C) Moreno Mateos MA et al., 2015	-28	0.845624	low	high	high	high	high	high	low	high	high	high
GGACTGTCTCTGAACGGCTG	C) Moreno Mateos MA et al., 2015	-28.9	0.6765	low	low	high	high	low	high	high	high	high	high
GGACTTTGTGCAAAGTGCTG	C) Moreno Mateos MA et al., 2015	-25.7	0.116028	high	high	high	high	high	high	high	high	high	high
GGAGAAAACTTGCCCGGGTC	C) Moreno Mateos MA et al., 2015	-22.5	0.659784	high	high	high	high	high	high	high	high	high	high
GGAGAAAAGCGCCCCGTCTA	C) Moreno Mateos MA et al., 2015	-26.6	0.581121	low	high	high	high	high	high	low	high	high	low
GGAGAAACCAGCAGAAGAGC	C) Moreno Mateos MA et al., 2015	-23.4	0.0363815	low	high	high	high	high	high	low	high	high	high
GGAGAAACCAGCATAGGTGG	C) Moreno Mateos MA et al., 2015	-24	0.693215	low	low	high	high	high	high	high	high	high	high
GGAGAAACTTGAAGTGTGGA	C) Moreno Mateos MA et al., 2015	-22.6	0.367748	low	low	high	high	high	high	low	high	high	high
GGAGAAAGAAAAGAGCGTGA	C) Moreno Mateos MA et al., 2015	-23.6	0.342183	high	high	high	high	high	high	high	high	high	high
GGAGAACACTCAGATGCTTG	C) Moreno Mateos MA et al., 2015	-24.3	0.350049	low	high	high	high	high	high	low	high	high	high
GGAGAACAGGCACAAGGCTG	C) Moreno Mateos MA et al., 2015	-28.3	0.92527	high	high	high	high	high	high	high	high	high	high
GGAGAACATGTATCGTACTA	C) Moreno Mateos MA et al., 2015	-25.5	0.121927	low	low	high	high	high	high	low	low	high	high
GGAGAACGATCCTGGTGATG	C) Moreno Mateos MA et al., 2015	-27.4	0.591937	low	high	high	high	high	high	low	high	high	high
GGAGAAGAAGAGGAGATTCC	C) Moreno Mateos MA et al., 2015	-22.7	0.435595	low	high	high	high	high	high	low	high	high	high
GGAGAAGCAGTCGGATGAGC	C) Moreno Mateos MA et al., 2015	-27.3	0.0776794	low	high	high	high	high	high	low	high	high	high
GGAGAAGCTCCTCTTCCCAG	C) Moreno Mateos MA et al., 2015	-24.8	0.866273	high	high	high	high	high	high	high	high	high	high
GGAGAAGTCGAACTGTATGA	C) Moreno Mateos MA et al., 2015	-25.4	0.176991	low	low	high	high	high	high	low	high	high	high
GGAGAATAAGATGGTGAAGT	C) Moreno Mateos MA et al., 2015	-23.4	0.440511	low	high	high	high	high	high	low	low	high	high
GGAGAATGCGGAGTCATACT	C) Moreno Mateos MA et al., 2015	-26.4	0.0717797	low	high	high	high	high	high	low	high	high	high
GGAGACACAGAAGCGGTGGG	C) Moreno Mateos MA et al., 2015	-25.3	0.770895	low	low	high	high	low	high	high	high	high	high
GGAGACACTGCTGTTCTTTT	C) Moreno Mateos MA et al., 2015	-23.6	0.0501475	low	high	low	high	low	high	low	high	high	high
GGAGACAGTATAAAGGAATT	C) Moreno Mateos MA et al., 2015	-22.9	0.179941	low	high	high	high	high	high	low	low	high	high
GGAGACATTCTGCGTTTGGG	C) Moreno Mateos MA et al., 2015	-22.1	0.364798	low	high	high	high	low	high	low	high	high	high
GGAGACGGAGAGGTGGAGCC	C) Moreno Mateos MA et al., 2015	-30.6	0.632252	low	high	high	low	high	high	high	high	high	high
GGAGACTCTAGGGAATCCAC	C) Moreno Mateos MA et al., 2015	-23.3	0.768928	low	high	high	high	high	high	low	high	high	high
GGAGACTGCTGCTGATGTAG	C) Moreno Mateos MA et al., 2015	-23.7	0.779744	low	high	high	high	high	high	low	high	high	high
GGAGAGAGACCTTCGGGAGA	C) Moreno Mateos MA et al., 2015	-24.2	0.594887	low	low	high	high	high	high	high	high	high	high
GGAGAGCAGGTCACAGGAGA	C) Moreno Mateos MA et al., 2015	-23.2	0.738446	low	low	high	high	low	high	low	high	high	high
GGAGAGCAGTAAACCTCCTT	C) Moreno Mateos MA et al., 2015	-26.6	0.210423	low	high	low	high	high	high	low	high	high	high
GGAGAGCTGACGCAGGCAGA	C) Moreno Mateos MA et al., 2015	-26.9	0.837758	high	high	high	high	high	high	high	high	high	high
GGAGAGCTGCACGGGCCCCG	C) Moreno Mateos MA et al., 2015	-28.4	0.436578	low	high	high	high	high	high	low	high	high	low
GGAGAGCTGCAGGGGTCCCC	C) Moreno Mateos MA et al., 2015	-25.9	0.482793	high	high	high	high	high	high	high	high	high	high
GGAGAGGACGTCTTGGGAGA	C) Moreno Mateos MA et al., 2015	-25.8	0.821042	high	high	high	high	high	high	high	high	high	high
GGAGAGGCGAGTGGTGTTTT	C) Moreno Mateos MA et al., 2015	-28.1	0.970501	low	high	low	high	high	high	low	high	high	high
GGAGAGGGGAGTGGGCAACA	C) Moreno Mateos MA et al., 2015	-29	0.780728	low	high	high	high	high	high	low	high	high	high
GGAGAGGTTGGAGAGTAGTT	C) Moreno Mateos MA et al., 2015	-27.7	0.979351	low	high	high	high	high	high	low	high	high	high
GGAGAGTAGCTTGGAGATGT	C) Moreno Mateos MA et al., 2015	-26.3	0.636185	low	high	high	high	high	high	low	high	high	high
GGAGAGTTTCGGCGGTGACG	C) Moreno Mateos MA et al., 2015	-25.3	0.452311	low	low	high	high	high	high	high	high	high	low
GGAGATCCAGAAAGACACGC	C) Moreno Mateos MA et al., 2015	-22.1	0.267453	high	high	high	high	high	high	high	high	high	high
GGAGATCCTTGAGGAACAAG	C) Moreno Mateos MA et al., 2015	-23.3	0.588004	low	low	high	high	high	high	low	high	high	low
GGAGATGAAGCTGCTGCGTA	C) Moreno Mateos MA et al., 2015	-27	0.683382	low	high	high	high	high	high	low	high	high	high
GGAGATGACGCAAAGGAAGG	C) Moreno Mateos MA et al., 2015	-26.8	0.760079	high	high	high	high	high	high	high	high	high	high
GGAGATGATGATTCGGGTGT	C) Moreno Mateos MA et al., 2015	-27.7	0.745329	high	high	high	high	high	high	high	high	high	high
GGAGATGCAAAGATGCTGCA	C) Moreno Mateos MA et al., 2015	-22.9	0.0481809	high	high	high	high	high	high	high	high	high	high
GGAGATGCACATGTGCACTG	C) Moreno Mateos MA et al., 2015	-24.8	0.444444	low	low	high	high	low	high	high	high	high	high
GGAGATGCCATCATCGAAAA	C) Moreno Mateos MA et al., 2015	-23.7	0.00786627	low	high	high	high	high	high	low	high	high	high
GGAGATGCCATTGGAGTGTT	C) Moreno Mateos MA et al., 2015	-26.9	0.104228	low	high	high	high	high	high	low	high	high	high
GGAGATGGTGTGAGAGCAAT	C) Moreno Mateos MA et al., 2015	-28.6	0.560472	low	high	high	high	high	high	low	high	high	high
GGAGATTTGGCGCCCCCGGC	C) Moreno Mateos MA et al., 2015	-25.6	0.331367	low	high	high	high	high	high	low	high	high	high
GGAGCAACACATCCGGTAGC	C) Moreno Mateos MA et al., 2015	-24.9	0.0334317	high	high	high	high	high	high	high	high	high	high
GGAGCAAGGGTGGGCTGAGG	C) Moreno Mateos MA et al., 2015	-26.4	0.623402	high	high	high	high	high	high	high	high	high	high
GGAGCACTCATCTGCAAGTT	C) Moreno Mateos MA et al., 2015	-23.4	0.677483	low	low	high	high	high	high	low	high	high	low
GGAGCAGAGTCTCTTTGCAT	C) Moreno Mateos MA et al., 2015	-25.4	0.662734	low	high	high	high	high	high	low	high	high	high
GGAGCAGATGTCTGTATATG	C) Moreno Mateos MA et al., 2015	-22.3	0.735497	low	low	high	high	high	high	low	high	high	high
GGAGCAGCAGCAGCCGACAC	C) Moreno Mateos MA et al., 2015	-24.6	0.373648	high	high	high	high	high	high	high	high	high	high
GGAGCAGCTGCCGTTTCAGT	C) Moreno Mateos MA et al., 2015	-26.3	0.485742	low	low	high	high	high	high	low	high	high	high
GGAGCAGGGGGTGGTGGAGC	C) Moreno Mateos MA et al., 2015	-27.5	0.324484	high	high	high	high	high	high	high	high	high	high
GGAGCAGTAGGACCCACCTC	C) Moreno Mateos MA et al., 2015	-28	0.764995	high	high	high	high	high	high	high	high	high	high
GGAGCATGGCTTCATAAGCA	C) Moreno Mateos MA et al., 2015	-24.8	0.169125	low	high	high	high	high	low	low	high	low	high
GGAGCCAGATCACACAGCTC	C) Moreno Mateos MA et al., 2015	-23.7	0.0530973	low	low	high	high	high	high	high	high	high	low
GGAGCCCACAGCCACCAGCG	C) Moreno Mateos MA et al., 2015	-23.1	0.93117	low	low	high	high	high	low	high	high	high	high
GGAGCCCGGGGGGGCTGCGG	C) Moreno Mateos MA et al., 2015	-29.8	0.390364	low	high	high	high	high	high	high	low	low	high
GGAGCCGCCGCAGTTCTCCA	C) Moreno Mateos MA et al., 2015	-24.1	0.0304818	low	high	high	high	high	high	low	high	high	high
GGAGCCTGGATGAGTGTGTG	C) Moreno Mateos MA et al., 2015	-26.8	0.926254	low	high	high	high	high	high	low	high	high	high
GGAGCCTGTGATCTCAAAGA	C) Moreno Mateos MA et al., 2015	-23.1	0.0344149	low	high	high	high	high	high	low	high	high	high
GGAGCCTTGCGAGATTTTGT	C) Moreno Mateos MA et al., 2015	-25.3	0	low	low	high	high	high	high	low	high	high	high
GGAGCGCATCTCTCGGCTGG	C) Moreno Mateos MA et al., 2015	-25.7	0.468043	low	low	high	high	high	high	high	high	high	low
GGAGCGGCAGGAGGGCAGGA	C) Moreno Mateos MA et al., 2015	-26	0.861357	high	high	high	high	high	high	high	high	high	high
GGAGCGGGTCAGTCTTCCCC	C) Moreno Mateos MA et al., 2015	-29.7	0.543756	low	high	high	high	low	high	high	high	high	high
GGAGCTATCAGCCCCATTCT	C) Moreno Mateos MA et al., 2015	-24.9	0.751229	low	high	high	high	high	high	low	high	high	high
GGAGCTGAAGGAGCAGTAGG	C) Moreno Mateos MA et al., 2015	-26.1	0.422812	low	high	high	high	high	high	low	high	high	high
GGAGCTGCAGGAGCACGCCA	C) Moreno Mateos MA et al., 2015	-26.5	0.72468	high	high	high	high	high	high	high	high	high	high
GGAGCTGCTGGCGCTGCTGG	C) Moreno Mateos MA et al., 2015	-27.3	0.784661	low	high	high	high	high	high	high	high	high	low
GGAGCTGGTGTACCACTGGA	C) Moreno Mateos MA et al., 2015	-24.8	0.478859	low	high	high	high	high	high	low	high	high	high
GGAGCTGTGTAGCAGAGTAA	C) Moreno Mateos MA et al., 2015	-23.9	0.899705	low	low	high	high	low	high	low	high	high	low
GGAGCTTACAGACAGCAGGG	C) Moreno Mateos MA et al., 2015	-26.3	0.33235	high	high	high	high	high	high	high	high	high	high
GGAGCTTCCACTTTCGGAGC	C) Moreno Mateos MA et al., 2015	-23.5	0.109145	high	high	high	high	high	high	high	high	high	high
GGAGCTTCGGGGCCAGAGCA	C) Moreno Mateos MA et al., 2015	-25.6	0.0629302	low	high	high	high	high	low	low	high	high	high
GGAGCTTCGTAAAATCGGTG	C) Moreno Mateos MA et al., 2015	-23.7	0.221239	low	low	high	high	high	low	high	high	high	low
GGAGCTTCTCTCTGAGTGCC	C) Moreno Mateos MA et al., 2015	-24.4	0.173058	high	high	high	high	high	high	high	high	high	high
GGAGGAACATCGCAAGAGCG	C) Moreno Mateos MA et al., 2015	-22.5	0.122911	low	low	high	high	high	low	high	high	high	high
GGAGGAACCGATGGAGGTGG	C) Moreno Mateos MA et al., 2015	-25.7	0.9941	high	high	high	high	high	high	high	high	high	high
GGAGGAACTGAGGGTGGCAG	C) Moreno Mateos MA et al., 2015	-26	0.948869	high	high	high	high	high	high	high	high	high	high
GGAGGAAGACGATGAAGACG	C) Moreno Mateos MA et al., 2015	-23.8	0.611603	low	low	high	high	high	high	low	high	high	low
GGAGGAAGCAGCTTTGGTGG	C) Moreno Mateos MA et al., 2015	-24.4	0.439528	high	high	high	high	high	high	high	high	high	high
GGAGGAATCGGCAGTGTTTC	C) Moreno Mateos MA et al., 2015	-24.4	0.40413	low	high	high	high	high	high	low	high	high	high
GGAGGACAACAGTGGCAGGG	C) Moreno Mateos MA et al., 2015	-26.7	0.786627	high	high	high	high	high	high	high	high	high	high
GGAGGACCCACAGTAGGATG	C) Moreno Mateos MA et al., 2015	-23.8	0.466077	low	high	high	high	high	high	low	high	high	high
GGAGGACGCGCTGCTTTGAG	C) Moreno Mateos MA et al., 2015	-29.5	0.761062	low	high	high	high	low	high	low	high	high	high
GGAGGACTCAGGCCTGGTTC	C) Moreno Mateos MA et al., 2015	-29.9	0.666667	low	high	high	high	high	high	low	high	high	high
GGAGGACTCATGGGATCAGC	C) Moreno Mateos MA et al., 2015	-25.8	0.512291	low	high	high	high	high	high	low	high	high	high
GGAGGACTTTGGTTTCGCCA	C) Moreno Mateos MA et al., 2015	-26.2	0.0422812	high	high	high	high	high	high	high	high	high	high
GGAGGAGACACCACAGACAG	C) Moreno Mateos MA et al., 2015	-22.8	0.99115	low	low	high	high	high	high	low	high	high	low
GGAGGAGATGTTGGCAATGA	C) Moreno Mateos MA et al., 2015	-24.3	0.708948	low	low	high	high	high	high	low	high	high	low
GGAGGAGCTTTCTGGGGTAG	C) Moreno Mateos MA et al., 2015	-26.5	0.681416	high	high	high	high	high	high	high	high	high	high
GGAGGAGGAACAACAGTAGG	C) Moreno Mateos MA et al., 2015	-23.6	0.879056	low	high	high	high	high	high	low	high	high	high
GGAGGAGGAAGATGAAGAAA	C) Moreno Mateos MA et al., 2015	-20	0.445428	low	low	high	high	low	high	low	high	high	low
GGAGGAGGGATTTACAGTAA	C) Moreno Mateos MA et al., 2015	-26.4	0.391347	low	high	high	high	high	high	low	high	high	high
GGAGGAGGTTGGCCCTGGTG	C) Moreno Mateos MA et al., 2015	-27.4	0.782694	low	high	high	high	high	low	high	high	high	high
GGAGGAGTTGTTGGAAGCGA	C) Moreno Mateos MA et al., 2015	-26.7	0.654867	low	high	high	high	high	high	low	high	high	low
GGAGGATCGTATTATCGTGG	C) Moreno Mateos MA et al., 2015	-21.3	0.130777	high	high	high	high	high	high	high	high	high	high
GGAGGATGGTCATGCGGTGA	C) Moreno Mateos MA et al., 2015	-26.3	0.750246	high	high	high	high	high	high	high	high	high	high
GGAGGATGTGTATATTGAGA	C) Moreno Mateos MA et al., 2015	-23	0.19469	low	low	high	high	high	high	low	low	high	high
GGAGGATTCCCTCGCATTCA	C) Moreno Mateos MA et al., 2015	-23.9	0.111111	low	high	high	high	high	high	low	high	high	high
GGAGGCACCTGTGCATTGGA	C) Moreno Mateos MA et al., 2015	-23.5	0.0412979	low	high	high	high	high	high	low	high	high	low
GGAGGCATGTTCTGAATGAC	C) Moreno Mateos MA et al., 2015	-24.3	0.0285152	low	low	high	high	high	high	low	high	high	low
GGAGGCATTTGTGGAGATGG	C) Moreno Mateos MA et al., 2015	-21.3	0.682399	low	high	high	high	high	high	low	high	low	high
GGAGGCCTCTGGAATCAGGA	C) Moreno Mateos MA et al., 2015	-27.4	0.563422	low	high	high	high	high	high	low	high	high	high
GGAGGCGATGTCGTGAGTAA	C) Moreno Mateos MA et al., 2015	-24.8	0.856441	low	low	high	high	high	high	low	high	high	low
GGAGGCGGCAGCGCAGCAGC	C) Moreno Mateos MA et al., 2015	-28.1	0.0393314	high	high	high	high	high	high	high	high	high	high
GGAGGGAAAACCAGTAAAGG	C) Moreno Mateos MA et al., 2015	-23	0.697148	low	high	high	high	high	high	low	high	high	high
GGAGGGAGGCTGGGGCAGAA	C) Moreno Mateos MA et al., 2015	-24.8	0.655851	low	high	high	high	high	high	low	high	high	high
GGAGGGCTCTCCGGCTGTGG	C) Moreno Mateos MA et al., 2015	-28.2	0.982301	high	high	high	high	high	high	high	high	high	high
GGAGGGCTTAAGGAGACGGG	C) Moreno Mateos MA et al., 2015	-23.8	0.726647	high	high	high	high	high	high	high	high	high	high
GGAGGGGTATGGTGGGGGCT	C) Moreno Mateos MA et al., 2015	-28.3	0.307768	low	low	high	high	high	high	high	high	high	low
GGAGGGGTGGACTCTGAGCC	C) Moreno Mateos MA et al., 2015	-30.6	0.988201	high	high	high	high	high	high	high	high	high	high
GGAGGGGTGTGCCAAGGGAA	C) Moreno Mateos MA et al., 2015	-24.7	0.956735	low	high	high	high	high	high	low	high	high	high
GGAGGGTCAATCCTAGGCTT	C) Moreno Mateos MA et al., 2015	-31.1	0.0550639	low	high	high	high	high	high	low	high	high	high
GGAGGGTCAGGTTATATCTC	C) Moreno Mateos MA et al., 2015	-22.5	0.306785	low	high	high	high	high	high	low	high	low	high
GGAGGGTGCGTGTGTCTGTC	C) Moreno Mateos MA et al., 2015	-24.8	0.526057	low	high	high	high	high	high	low	high	high	high
GGAGGGTTGGGAGACAGGGC	C) Moreno Mateos MA et al., 2015	-27.1	0.721731	low	high	high	high	high	high	high	high	high	low
GGAGGTAAGAGCTTCAAGAT	C) Moreno Mateos MA et al., 2015	-24.5	0.0835792	low	high	high	high	high	high	low	high	high	high
GGAGGTACTGGAGGAACGAC	C) Moreno Mateos MA et al., 2015	-24.7	0.692232	low	high	high	high	high	high	low	high	high	high
GGAGGTCTCGGCCTATGGTT	C) Moreno Mateos MA et al., 2015	-28.9	1	low	high	high	high	high	high	low	high	high	high
GGAGGTCTGAGGCCCAGCCT	C) Moreno Mateos MA et al., 2015	-29.6	0.463127	low	high	high	high	high	high	high	high	low	high
GGAGGTCTGTGCTCCATGTG	C) Moreno Mateos MA et al., 2015	-24	0.914454	low	low	high	high	high	high	low	high	high	low
GGAGGTGAGGCCCCTGTGAG	C) Moreno Mateos MA et al., 2015	-24.9	0.860374	low	high	high	high	high	high	low	high	high	high
GGAGGTGCATATGACATGAT	C) Moreno Mateos MA et al., 2015	-22.2	0.929204	low	high	high	high	high	high	low	high	high	high
GGAGGTGCTGGACTCCACTG	C) Moreno Mateos MA et al., 2015	-30.6	0.833825	high	high	high	high	high	high	high	high	high	high
GGAGGTGGAAGCTTTGGGAT	C) Moreno Mateos MA et al., 2015	-25.6	0.639135	low	high	high	high	high	high	low	high	high	high
GGAGGTGGAAGTGCAGGACA	C) Moreno Mateos MA et al., 2015	-26.1	0.87119	low	low	high	high	low	high	low	high	high	low
GGAGGTGGACATGGAGAAGC	C) Moreno Mateos MA et al., 2015	-28.5	0.545723	low	high	high	high	high	high	low	high	high	low
GGAGGTGGAGACATTGGACT	C) Moreno Mateos MA et al., 2015	-26.8	0.803343	low	low	high	high	high	high	low	high	high	low
GGAGGTTGGAGGTGTGTATG	C) Moreno Mateos MA et al., 2015	-25.1	0.983284	low	low	high	high	low	high	low	high	high	low
GGAGGTTGGTGGACCCAATG	C) Moreno Mateos MA et al., 2015	-28.8	0.938053	low	high	high	high	high	high	low	high	high	low
GGAGGTTTTGAAGATCGGAG	C) Moreno Mateos MA et al., 2015	-24.1	0.479843	low	low	high	high	low	high	high	high	high	low
GGAGTACGAGCTGACATGAG	C) Moreno Mateos MA et al., 2015	-25.5	0.53884	low	high	high	high	high	high	low	high	high	high
GGAGTAGCTCCTGTATTCCA	C) Moreno Mateos MA et al., 2015	-27	0.52999	low	high	high	high	high	high	low	high	high	high
GGAGTAGTAAGGTGCTGCCT	C) Moreno Mateos MA et al., 2015	-31	0.836775	low	high	high	high	high	high	high	high	high	low
GGAGTCAACGTAGTTTGTGA	C) Moreno Mateos MA et al., 2015	-21.2	0.519174	low	high	high	high	high	high	low	high	high	high
GGAGTCACACCCGCCGGCAT	C) Moreno Mateos MA et al., 2015	-24.2	0.774828	high	high	high	high	high	high	high	high	high	high
GGAGTCCTGCACTGTTCCCA	C) Moreno Mateos MA et al., 2015	-22.1	0.547689	low	high	high	high	high	high	low	high	high	high
GGAGTCGGTCGCTGAGCTGT	C) Moreno Mateos MA et al., 2015	-30.3	0.711898	low	high	high	high	high	high	low	high	high	high
GGAGTGAGCCAGTCTGGAAG	C) Moreno Mateos MA et al., 2015	-27.5	0.448378	low	low	high	high	high	high	low	high	high	high
GGAGTGCCCAGTGAAGGAGG	C) Moreno Mateos MA et al., 2015	-24.5	0.855457	high	high	high	high	high	high	high	high	high	high
GGAGTGCTGCTATAGGACAT	C) Moreno Mateos MA et al., 2015	-24.8	0.678466	low	low	high	high	high	high	low	high	high	low
GGAGTGGGATTGACGGCTTC	C) Moreno Mateos MA et al., 2015	-29.4	0.473943	high	high	high	high	high	high	high	high	high	high
GGAGTTAGAGGCCCGTCGTA	C) Moreno Mateos MA et al., 2015	-24.1	0.746313	low	high	high	high	high	high	low	high	high	high
GGAGTTCATGAGATTTTAAG	C) Moreno Mateos MA et al., 2015	-23.7	0.642085	low	low	high	high	high	high	low	low	high	low
GGAGTTGCGGGTAGGTGGAG	C) Moreno Mateos MA et al., 2015	-28.2	0.451327	low	high	high	high	high	high	high	high	high	low
GGAGTTGCTGGGACCACCTG	C) Moreno Mateos MA et al., 2015	-31.3	0.729597	low	high	high	high	high	high	high	high	high	low
GGAGTTGGCACCATTCATGT	C) Moreno Mateos MA et al., 2015	-25.5	0.788594	low	high	high	high	high	high	low	high	high	high
GGAGTTGGTTTATCGGTAGG	C) Moreno Mateos MA et al., 2015	-29.2	0.840708	low	low	high	high	high	high	high	high	high	low
GGATAACTGCAGGAGGGATA	C) Moreno Mateos MA et al., 2015	-25.7	0.869223	low	low	high	high	low	high	low	high	high	high
GGATAAGGAGGGCTATGTGG	C) Moreno Mateos MA et al., 2015	-30	0.67355	low	high	high	high	high	high	low	high	high	high
GGATACACCCCACAGAGCCC	C) Moreno Mateos MA et al., 2015	-25.5	0.175025	high	high	high	high	high	high	high	high	high	high
GGATACGGAGGTGGAGGATA	C) Moreno Mateos MA et al., 2015	-27.2	0.704031	low	low	high	high	high	high	low	high	high	high
GGATACGGGCGCTCGTGCAC	C) Moreno Mateos MA et al., 2015	-29	0.820059	high	high	high	high	high	high	high	high	high	high
GGATATGGATGATGGTTAGA	C) Moreno Mateos MA et al., 2015	-28.7	0.0648968	low	high	high	high	high	high	low	low	high	high
GGATCAGAGATCAAGTGTCT	C) Moreno Mateos MA et al., 2015	-23.7	0.393314	low	high	high	high	high	high	low	high	high	low
GGATCATATGGTGCAATGGT	C) Moreno Mateos MA et al., 2015	-23.2	0.546706	low	high	high	high	high	high	low	high	high	high
GGATCCGAGCCGGCCACCAA	C) Moreno Mateos MA et al., 2015	-25.8	0.873156	low	high	high	high	high	high	low	high	high	high
GGATCCTGACGACCCACTGC	C) Moreno Mateos MA et al., 2015	-23.9	0.302852	high	high	high	high	high	high	high	high	high	high
GGATCGCCGTATCTGCACCT	C) Moreno Mateos MA et al., 2015	-24.7	0.844641	high	high	high	high	high	high	high	high	high	high
GGATCGGCAGAGGATGGCGG	C) Moreno Mateos MA et al., 2015	-26.5	0.665683	high	high	high	high	high	high	high	high	high	high
GGATCGTTGCTGAATGACAG	C) Moreno Mateos MA et al., 2015	-23.7	0.0747296	low	low	high	high	high	high	low	high	high	low
GGATCTGAAGGTGGTGCTGG	C) Moreno Mateos MA et al., 2015	-25.5	0.238938	high	high	high	high	high	high	high	high	high	high
GGATCTTCAGGCAAAGGTCG	C) Moreno Mateos MA et al., 2015	-23.8	0.20649	high	high	high	high	high	high	high	high	high	high
GGATCTTCTGTTGACCACCG	C) Moreno Mateos MA et al., 2015	-23.5	0.818092	low	low	high	high	high	high	high	high	high	high
GGATCTTGAATGGTGGGATC	C) Moreno Mateos MA et al., 2015	-22.8	0.378564	low	low	high	high	high	high	high	high	high	high
GGATCTTTGGGGTCAACATC	C) Moreno Mateos MA et al., 2015	-21.2	0.359882	low	high	high	high	high	high	low	high	high	high
GGATGAACGCGAGACCGCGC	C) Moreno Mateos MA et al., 2015	-27.4	0.582104	low	low	high	high	high	high	low	high	high	high
GGATGAACTGCTGGGTGGGA	C) Moreno Mateos MA et al., 2015	-27.3	0.499508	high	high	high	high	high	high	high	high	high	high
GGATGAATGCTATCAGCAAT	C) Moreno Mateos MA et al., 2015	-26.3	0.00589971	low	high	high	high	high	high	low	low	high	high
GGATGACTCAAAGGCAAGTG	C) Moreno Mateos MA et al., 2015	-26.3	0.850541	low	high	high	high	high	low	low	high	high	high
GGATGAGGAGGTGGCGGCGG	C) Moreno Mateos MA et al., 2015	-30.7	0.880039	low	low	high	high	low	high	low	high	high	low
GGATGAGTGTCCATCCTCCT	C) Moreno Mateos MA et al., 2015	-26.5	0.895772	high	high	high	high	high	high	high	high	high	high
GGATGATGATTACCTTGAGC	C) Moreno Mateos MA et al., 2015	-29.2	0.180924	low	high	high	high	low	high	low	high	high	high
GGATGCTTGGAGAAGAGCTG	C) Moreno Mateos MA et al., 2015	-29.4	0.587021	high	high	high	high	high	high	high	high	high	high
GGATGCTTTACGGGAAGTCA	C) Moreno Mateos MA et al., 2015	-27.3	0.52704	low	high	high	high	high	high	low	high	high	high
GGATGGAAGAATATTGGAAA	C) Moreno Mateos MA et al., 2015	-23.3	0.375615	low	high	high	high	high	high	low	low	high	high
GGATGGAGGGCATGTGAATT	C) Moreno Mateos MA et al., 2015	-31.1	0.653884	low	high	high	high	high	high	low	high	high	high
GGATGGCCTATCTAGTAGTC	C) Moreno Mateos MA et al., 2015	-28.7	0.819076	low	high	high	high	high	high	low	high	high	high
GGATGGCGGAGGATATGAGA	C) Moreno Mateos MA et al., 2015	-29.5	0.734513	low	high	high	high	high	high	low	high	high	high
GGATGGTACCATGATAAGTT	C) Moreno Mateos MA et al., 2015	-24.1	0.296952	low	high	high	high	high	high	low	low	high	high
GGATGGTTATAGTTATGCAG	C) Moreno Mateos MA et al., 2015	-24.4	0.0216323	low	high	high	high	high	high	low	low	high	high
GGATGTATGAAGTCCTGACC	C) Moreno Mateos MA et al., 2015	-21.5	0.489676	high	high	high	high	high	high	high	high	high	high
GGATGTGATGGAGAGGGAGG	C) Moreno Mateos MA et al., 2015	-29.6	0.425762	high	high	high	high	high	high	high	high	high	high
GGATGTGGCCCCTGGACTTG	C) Moreno Mateos MA et al., 2015	-27.5	0.533923	low	high	high	high	high	high	low	high	high	high
GGATGTGGCCGTCAACTTCG	C) Moreno Mateos MA et al., 2015	-28	0.0973451	low	high	high	high	high	high	low	high	high	high
GGATTACAATCAGAGTTCTG	C) Moreno Mateos MA et al., 2015	-24	0.146509	low	low	high	high	high	high	low	low	high	high
GGATTAGTGGACAGTCTTTT	C) Moreno Mateos MA et al., 2015	-31.9	0.491642	low	high	low	high	low	high	low	low	high	high
GGATTGAGGTAAACCAGAGT	C) Moreno Mateos MA et al., 2015	-23.1	0.156342	low	high	high	high	high	high	low	high	high	high
GGATTGGAGTCCCATGAAGA	C) Moreno Mateos MA et al., 2015	-23.7	0.376598	low	high	high	high	high	high	low	high	high	high
GGATTGGGGGTTGGGATTGA	C) Moreno Mateos MA et al., 2015	-25.4	0.599803	low	high	high	high	high	high	low	high	high	high
GGATTGTTGTCTAATTGAAG	C) Moreno Mateos MA et al., 2015	-23.6	0.26647	low	high	high	high	high	high	low	low	high	high
GGATTGTTTACGATTACGAG	C) Moreno Mateos MA et al., 2015	-22.3	0.187807	low	high	high	high	high	high	low	low	high	high
GGATTTCATCAGTCTTCCAG	C) Moreno Mateos MA et al., 2015	-26.1	0.138643	low	high	high	high	high	high	low	high	high	high
GGATTTCGACGGCAACTCTG	C) Moreno Mateos MA et al., 2015	-25.7	0.828909	low	high	high	high	high	high	low	high	high	high
GGATTTGCACTTTGACTTTG	C) Moreno Mateos MA et al., 2015	-25.9	0.312684	low	low	high	high	high	high	low	low	high	high
GGCAAAACCAAGGAGCTCCA	C) Moreno Mateos MA et al., 2015	-23	0.469027	low	low	high	high	high	high	high	high	high	low
GGCAAACGTGTGCTTATGTT	C) Moreno Mateos MA et al., 2015	-25.4	0.747296	low	high	high	high	low	high	low	high	high	high
GGCAAATACTTTTCCACAGC	C) Moreno Mateos MA et al., 2015	-20.6	0.247788	high	high	high	high	high	high	high	high	high	high
GGCAAATCCCTGGTGGTGTG	C) Moreno Mateos MA et al., 2015	-23.3	0.157325	high	high	high	high	high	high	high	high	high	high
GGCAAATGTGCCTTCCCGTA	C) Moreno Mateos MA et al., 2015	-24.3	0.618486	high	high	high	high	high	high	high	high	high	high
GGCAACATCCAAACGGTGCA	C) Moreno Mateos MA et al., 2015	-24.7	0.492625	low	low	high	high	low	high	high	high	high	high
GGCAACTTCTCCCCTCAGAT	C) Moreno Mateos MA et al., 2015	-21.6	0.186824	low	high	high	high	low	high	low	high	high	high
GGCAACTTTTTCACCTCAAG	C) Moreno Mateos MA et al., 2015	-24.4	0	low	low	high	high	high	high	low	high	high	low
GGCAAGGAGATAGAGTTTGC	C) Moreno Mateos MA et al., 2015	-25.9	0.13471	low	high	high	high	high	high	low	high	high	low
GGCAAGTTCCTTTCAACCAA	C) Moreno Mateos MA et al., 2015	-20.7	0.628319	low	high	high	high	high	high	low	high	high	high
GGCAATACGGTCAGACAGAC	C) Moreno Mateos MA et al., 2015	-23.1	0.905605	low	high	high	high	high	high	low	high	high	high
GGCAATCCGCTCCGAGGACA	C) Moreno Mateos MA et al., 2015	-25.3	0.301868	low	low	high	high	high	high	low	high	high	high
GGCAATCTCCGTAAAGACAC	C) Moreno Mateos MA et al., 2015	-19.1	0.0816126	low	low	high	high	high	high	low	high	high	high
GGCAATGGGAAAGCGTGTAC	C) Moreno Mateos MA et al., 2015	-26	0.923304	low	high	high	high	high	high	low	high	high	high
GGCAATGGTAATCAGGTGCA	C) Moreno Mateos MA et al., 2015	-24.2	0.578171	low	low	high	high	low	high	high	high	high	high
GGCAATGTAGACACAGCTAA	C) Moreno Mateos MA et al., 2015	-26.5	0.521141	low	high	high	high	high	high	low	high	high	high
GGCAATGTGGGTGTTGGTAG	C) Moreno Mateos MA et al., 2015	-23.7	0.500492	low	low	high	high	high	high	low	high	high	low
GGCACACTGAATCCCACACA	C) Moreno Mateos MA et al., 2015	-19.8	0.431662	low	low	high	high	high	high	low	high	high	low
GGCACAGACCAATGCAGCAG	C) Moreno Mateos MA et al., 2015	-22.2	0.150442	high	high	high	high	high	high	high	high	high	high
GGCACAGGGCAATGGTGGTG	C) Moreno Mateos MA et al., 2015	-25.9	0.910521	low	high	high	high	high	low	high	high	high	high
GGCACATTCCACCACAAGTT	C) Moreno Mateos MA et al., 2015	-22.1	0.216323	low	low	high	high	high	high	low	high	high	low
GGCACCACTCTGCAGTGCCT	C) Moreno Mateos MA et al., 2015	-29	0.299902	low	high	high	high	high	high	high	high	high	low
GGCACCCTGTCCCAAGGCAG	C) Moreno Mateos MA et al., 2015	-25.2	0.791544	low	low	high	high	high	high	high	high	low	low
GGCACCTCCAGAAGCAGAGG	C) Moreno Mateos MA et al., 2015	-23.2	0.503441	high	high	high	high	high	high	high	high	high	high
GGCACCTGCAACCGCGCAAT	C) Moreno Mateos MA et al., 2015	-23.3	0.13766	low	high	high	high	high	high	low	high	high	low
GGCACGCGCATGCCAGTGTG	C) Moreno Mateos MA et al., 2015	-26.1	0.0678466	low	high	high	high	high	high	low	high	high	high
GGCACGGCACATAGAGATGG	C) Moreno Mateos MA et al., 2015	-24.9	0.0314651	low	high	high	high	high	high	low	high	high	high
GGCACGTGGGCCTCATTGGA	C) Moreno Mateos MA et al., 2015	-24.2	0.614553	low	high	high	high	high	high	low	high	high	high
GGCACTAGAGGACAGAGAAC	C) Moreno Mateos MA et al., 2015	-25.1	0.228122	low	high	high	high	high	high	low	high	high	high
GGCACTCACCGGAATGAGCA	C) Moreno Mateos MA et al., 2015	-25.3	0.0167158	low	high	high	high	high	low	low	high	high	high
GGCACTCTGCACCCGGGCCA	C) Moreno Mateos MA et al., 2015	-27.3	0.402163	low	low	high	high	high	high	high	high	high	high
GGCACTGAAAGCGGCCAGGA	C) Moreno Mateos MA et al., 2015	-26.7	0.635202	high	high	high	high	high	high	high	high	high	high
GGCACTGGCATTGAGGATGG	C) Moreno Mateos MA et al., 2015	-26.6	0.621436	high	high	high	high	high	high	high	high	high	high
GGCACTGGTAGCCCATTTGG	C) Moreno Mateos MA et al., 2015	-28.8	0.470993	low	low	high	high	high	high	low	high	high	high
GGCACTGTGATCCGCCCTGA	C) Moreno Mateos MA et al., 2015	-24	0.590954	high	high	high	high	high	high	high	high	high	high
GGCAGAAATGTGCTCTTGCA	C) Moreno Mateos MA et al., 2015	-22.7	0.0540806	low	high	high	high	high	high	low	high	high	high
GGCAGACGTCAGTTCAGTTC	C) Moreno Mateos MA et al., 2015	-24.5	0.0294985	low	low	high	high	high	high	low	high	high	low
GGCAGAGGTCTGCTCTGTGT	C) Moreno Mateos MA et al., 2015	-26.5	0.854474	low	high	high	high	high	high	low	high	low	high
GGCAGAGTGGGAGCTCTCGA	C) Moreno Mateos MA et al., 2015	-23.7	0.166175	low	low	high	high	high	high	low	high	high	low
GGCAGATCCCTTAGAGCCGG	C) Moreno Mateos MA et al., 2015	-25.6	0.933137	high	high	high	high	high	high	high	high	high	high
GGCAGATGCCAACCCAGAGG	C) Moreno Mateos MA et al., 2015	-26	0.608653	low	low	high	high	high	high	high	high	high	low
GGCAGCACAGCCTACGGTGG	C) Moreno Mateos MA et al., 2015	-26.2	0.94297	low	low	high	high	low	high	high	high	high	high
GGCAGCACTGTAGCAGCAGT	C) Moreno Mateos MA et al., 2015	-26.7	0.588987	low	low	high	high	high	high	low	high	low	low
GGCAGCACTTAGTGGGGACA	C) Moreno Mateos MA et al., 2015	-24.9	0.86824	low	low	high	high	high	high	high	high	high	high
GGCAGCAGCAGCTACAACAC	C) Moreno Mateos MA et al., 2015	-20.2	0.562439	low	high	high	high	high	high	low	high	high	high
GGCAGCATCGAGGGGCCTGA	C) Moreno Mateos MA et al., 2015	-27.4	0.46706	high	high	high	high	high	high	high	high	high	high
GGCAGCCATGTACAGCATGC	C) Moreno Mateos MA et al., 2015	-25.1	0.566372	low	low	high	high	high	high	high	high	high	high
GGCAGCCGCCAGTAAGTTAC	C) Moreno Mateos MA et al., 2015	-24.7	0.93707	low	high	high	high	high	high	low	high	high	high
GGCAGGAACATTCGGACAGC	C) Moreno Mateos MA et al., 2015	-29.8	0.366765	low	high	high	high	high	high	high	high	high	low
GGCAGGAGAGACTGGGAAAG	C) Moreno Mateos MA et al., 2015	-26.8	0.288102	low	high	high	high	high	high	low	high	high	high
GGCAGGCAGCTTACACCCCG	C) Moreno Mateos MA et al., 2015	-23.6	0.764012	high	high	high	high	high	high	high	high	high	high
GGCAGGCATGCACCAGAGAC	C) Moreno Mateos MA et al., 2015	-20.7	0.675516	low	high	high	high	high	high	low	high	high	high
GGCAGGCCGAGTGGCTGCGC	C) Moreno Mateos MA et al., 2015	-28.3	0.705015	high	high	high	high	high	high	high	high	high	high
GGCAGTCCCTGCATTGGGTG	C) Moreno Mateos MA et al., 2015	-25.3	0.829892	low	low	high	high	high	low	high	high	low	high
GGCAGTGACCCTGAGAGCGT	C) Moreno Mateos MA et al., 2015	-25.4	0.778761	high	high	high	high	high	high	high	high	high	high
GGCAGTGGCAGAGCAGAGGC	C) Moreno Mateos MA et al., 2015	-23.7	0.640118	high	high	high	high	high	high	high	high	high	high
GGCAGTGGTGAAGAGAGTCT	C) Moreno Mateos MA et al., 2015	-27	0.580138	low	high	high	high	high	high	low	high	high	high
GGCAGTTGTGCGTGTATCCT	C) Moreno Mateos MA et al., 2015	-25.5	0.971485	low	high	high	high	high	high	low	high	high	low
GGCATAGCTGTAACAGGTGG	C) Moreno Mateos MA et al., 2015	-24.4	0.789577	high	high	high	high	high	high	high	high	high	high
GGCATAGTAAGCCACCTGTT	C) Moreno Mateos MA et al., 2015	-24.8	0.777778	low	high	high	high	high	high	low	high	high	high
GGCATCAGAGTAAACCCTGA	C) Moreno Mateos MA et al., 2015	-22.4	0.253687	high	high	high	high	high	high	high	high	high	high
GGCATCAGGATGGAAAGACT	C) Moreno Mateos MA et al., 2015	-25	0.370698	low	high	high	high	high	high	low	high	high	high
GGCATCCAACTTGCGTTTAC	C) Moreno Mateos MA et al., 2015	-22	0.283186	low	high	high	high	high	high	low	high	high	high
GGCATCTGCTGACCCTGAGG	C) Moreno Mateos MA et al., 2015	-27.7	0.245821	low	low	high	high	high	high	high	high	high	low
GGCATGAAGCGTAGTCTTGA	C) Moreno Mateos MA et al., 2015	-27.5	0.0924287	low	high	high	high	low	high	low	high	high	high
GGCATGCAGACCGATGCGCT	C) Moreno Mateos MA et al., 2015	-25.6	0.644051	high	high	high	high	high	high	high	high	high	high
GGCATGCGTCCTGGACCACA	C) Moreno Mateos MA et al., 2015	-25.9	0.548673	low	high	high	high	high	high	low	high	high	high
GGCATGGAAGGCTGAGAGTT	C) Moreno Mateos MA et al., 2015	-26.6	0.74238	low	high	high	high	low	high	low	high	high	high
GGCATGGATCGGGTGAACGG	C) Moreno Mateos MA et al., 2015	-26.8	0.806293	low	high	high	high	high	high	high	high	high	low
GGCATGGGCGGAGGTTCACT	C) Moreno Mateos MA et al., 2015	-27.5	0.832842	low	high	high	high	high	high	low	high	high	high
GGCATGTAAGACCCCCGAGC	C) Moreno Mateos MA et al., 2015	-23.1	0.322517	low	low	high	high	high	high	high	high	high	low
GGCATGTGCAGCCGTGGGTT	C) Moreno Mateos MA et al., 2015	-25.9	0.707965	low	high	high	high	low	high	low	high	high	high
GGCATTGAGTGTAGTCGTCG	C) Moreno Mateos MA et al., 2015	-23.1	0.0855457	high	high	high	high	high	high	high	high	high	high
GGCATTGGCTTTGATTCGGC	C) Moreno Mateos MA et al., 2015	-27.2	0.646018	high	high	high	high	high	high	high	high	high	high
GGCATTTGTTGTGCCACTGT	C) Moreno Mateos MA et al., 2015	-26.6	0.620452	low	high	high	high	high	high	low	high	high	high
GGCCAAAGGGGGCGCTGCGG	C) Moreno Mateos MA et al., 2015	-27.1	0.39528	high	high	high	high	high	high	high	high	high	high
GGCCACAATCACTCCATCTG	C) Moreno Mateos MA et al., 2015	-22.1	0.688299	low	low	high	high	high	high	low	high	high	low
GGCCACATCCTCTTTGCGCC	C) Moreno Mateos MA et al., 2015	-22	0.0580138	high	high	high	high	high	high	high	high	high	high
GGCCACTCTTGTGGTTGCCC	C) Moreno Mateos MA et al., 2015	-29.4	0.352999	low	high	high	high	high	high	high	high	low	high
GGCCAGACAGTTTGAGGCTT	C) Moreno Mateos MA et al., 2015	-27.1	0.352016	low	high	high	high	low	high	low	high	high	high
GGCCAGCACACGAAAGAAAG	C) Moreno Mateos MA et al., 2015	-21.2	0.149459	low	high	high	high	high	high	low	high	high	high
GGCCAGCAGCCGGGAGAGCG	C) Moreno Mateos MA et al., 2015	-28.1	0.438545	low	high	high	high	high	low	high	high	high	high
GGCCAGGAACTGCGTCTGGT	C) Moreno Mateos MA et al., 2015	-27.4	0.135693	low	high	high	high	high	high	low	high	high	high
GGCCAGGCATGTTGGGACAG	C) Moreno Mateos MA et al., 2015	-25.2	0.27532	low	low	high	high	high	high	high	high	high	low
GGCCAGGCCAAGGACCCTCT	C) Moreno Mateos MA et al., 2015	-29.8	0.235988	high	high	high	high	high	high	high	high	high	high
GGCCAGGGAGCGAAAGGGAG	C) Moreno Mateos MA et al., 2015	-23.7	0.631268	low	low	high	high	high	high	high	high	high	low
GGCCAGGTCACCACACTCAG	C) Moreno Mateos MA et al., 2015	-21.6	0.530973	low	low	high	high	high	high	low	high	high	low
GGCCAGGTGAACTTTATTAG	C) Moreno Mateos MA et al., 2015	-22.2	0.239921	low	low	high	high	high	high	low	high	high	low
GGCCAGTGGCTGCAGGGCTC	C) Moreno Mateos MA et al., 2015	-27.9	0.86234	low	low	high	high	high	high	high	high	high	high
GGCCATAGTGGAACACACAG	C) Moreno Mateos MA et al., 2015	-24.3	0.550639	low	high	high	high	high	high	low	high	high	high
GGCCATCAGTTCAACAGAAG	C) Moreno Mateos MA et al., 2015	-21.2	0.0953786	low	high	high	high	high	high	low	high	high	high
GGCCATTGAGCGCTGGATGG	C) Moreno Mateos MA et al., 2015	-26	0.285152	low	low	high	high	low	high	high	high	high	high
GGCCATTGCCGACCTCTTCA	C) Moreno Mateos MA et al., 2015	-24.2	0.3294	low	high	high	high	high	high	low	high	high	high
GGCCCAACAAGCTGCATGGG	C) Moreno Mateos MA et al., 2015	-22.2	0.749263	low	low	high	high	low	high	high	high	high	low
GGCCCACAGGGCACTGGGGC	C) Moreno Mateos MA et al., 2015	-29.7	0.400197	high	high	high	high	high	high	high	high	high	high
GGCCCAGCATGTGACTCACC	C) Moreno Mateos MA et al., 2015	-24.7	0.59292	high	high	high	high	high	high	high	high	high	high
GGCCCAGGAGCAGGAGAAGC	C) Moreno Mateos MA et al., 2015	-26.1	0.585054	low	high	high	high	high	high	low	high	high	high
GGCCCATTTGCGTACACACA	C) Moreno Mateos MA et al., 2015	-19.7	0.277286	low	low	high	high	high	high	low	high	high	high
GGCCCCTAGGGGGACCCGAG	C) Moreno Mateos MA et al., 2015	-27.7	0.47591	high	high	high	high	high	high	high	high	high	high
GGCCCCTGAGATGAGGCCCA	C) Moreno Mateos MA et al., 2015	-26.8	0.176008	high	high	high	high	high	high	high	high	high	high
GGCCCGAATCTCCGGTGTGA	C) Moreno Mateos MA et al., 2015	-27.2	0.800393	low	low	high	high	high	high	low	high	high	low
GGCCCGCGAGCAGGAGCAGT	C) Moreno Mateos MA et al., 2015	-26.5	0.827925	low	high	high	high	high	high	low	high	high	high
GGCCCGCTGGGTCTGTCCAG	C) Moreno Mateos MA et al., 2015	-26.2	0.917404	high	high	high	high	high	high	high	high	high	high
GGCCCGGCGGGATCAGGTGG	C) Moreno Mateos MA et al., 2015	-26.1	0.817109	high	high	high	high	high	high	high	high	high	high
GGCCCTCCCTCTGCTGCCTC	C) Moreno Mateos MA et al., 2015	-27	0.384464	high	high	high	high	high	high	high	high	high	high
GGCCCTCGGTCCGGCGATGA	C) Moreno Mateos MA et al., 2015	-25.3	0.413963	low	high	high	high	high	high	low	high	high	high
GGCCCTGAAAGTGGCAACGG	C) Moreno Mateos MA et al., 2015	-24.8	0.60767	high	high	high	high	high	high	high	high	high	high
GGCCCTGCTCATAGTCCTCT	C) Moreno Mateos MA et al., 2015	-24	0.0117994	low	high	high	high	high	high	low	high	high	high
GGCCCTGCTGACGTTGTTGC	C) Moreno Mateos MA et al., 2015	-25.7	0.231072	low	low	high	high	high	high	low	high	high	low
GGCCCTTCACAGGAGCCATC	C) Moreno Mateos MA et al., 2015	-25.3	0.766962	high	high	high	high	high	high	high	high	high	high
GGCCCTTCCGTATGCCTGTG	C) Moreno Mateos MA et al., 2015	-23.5	0.544739	high	high	high	high	high	high	high	high	high	high
GGCCGAAACAACTACAACTC	C) Moreno Mateos MA et al., 2015	-22	0.360865	low	high	high	high	high	high	low	high	high	high
GGCCGACACCAATCGCTCAA	C) Moreno Mateos MA et al., 2015	-22.5	0.204523	low	low	high	high	high	high	low	high	high	low
GGCCGACTTCTCGCTGTCCG	C) Moreno Mateos MA et al., 2015	-24.1	0.154376	high	high	high	high	high	high	high	high	high	high
GGCCGAGGAGGAGGACCTGA	C) Moreno Mateos MA et al., 2015	-26.3	0.246804	low	high	high	high	high	high	low	high	high	low
GGCCGCAGTATTGGCCTGAG	C) Moreno Mateos MA et al., 2015	-28.1	0.212389	high	high	high	high	high	high	high	high	high	high
GGCCGCGGGGGGTTGTTGGC	C) Moreno Mateos MA et al., 2015	-25	0.362832	high	high	high	high	high	high	high	high	high	high
GGCCGCTTCTGAGCCGGAGG	C) Moreno Mateos MA et al., 2015	-26.4	0.40708	low	low	high	high	high	high	high	high	high	low
GGCCGGAGGCACCATACTGA	C) Moreno Mateos MA et al., 2015	-23.1	0.47001	low	high	high	high	high	high	low	high	high	high
GGCCGTGAGTCGCGGATCTC	C) Moreno Mateos MA et al., 2015	-27.2	0.6588	low	high	high	high	high	high	low	high	high	high
GGCCGTGCTGGAGGTGGCCA	C) Moreno Mateos MA et al., 2015	-29.1	0.507375	high	high	high	high	high	high	high	high	high	high
GGCCGTGGCGAGTCTGCTGC	C) Moreno Mateos MA et al., 2015	-29.7	0.168142	high	high	high	high	high	high	high	high	high	high
GGCCTAACTGTTCTCTTGAG	C) Moreno Mateos MA et al., 2015	-23.1	0.719764	low	low	high	high	high	high	low	high	high	low
GGCCTCCACGAAGACCCTAC	C) Moreno Mateos MA et al., 2015	-22.2	0.531957	high	high	high	high	high	high	high	high	high	high
GGCCTCCAGTTTTCGCTGTA	C) Moreno Mateos MA et al., 2015	-24.6	0.297935	low	high	high	high	high	high	low	high	high	high
GGCCTCTTAACTTTGTCCAT	C) Moreno Mateos MA et al., 2015	-23	0.152409	low	high	high	high	high	high	low	high	high	high
GGCCTGAAGCGAAGGTTTCT	C) Moreno Mateos MA et al., 2015	-28.2	0.020649	low	high	high	high	high	high	low	high	low	high
GGCCTGAGCAGCGACAGCTT	C) Moreno Mateos MA et al., 2015	-29.9	0.919371	low	high	high	high	low	high	low	high	high	high
GGCCTGAGGGGCAAATTCTG	C) Moreno Mateos MA et al., 2015	-27.3	0.0884956	low	low	high	high	high	high	low	high	low	low
GGCCTGCATGTTGCAGTGAT	C) Moreno Mateos MA et al., 2015	-24.7	0.616519	low	high	high	high	high	high	low	high	high	high
GGCCTGCCCATTATAGATAA	C) Moreno Mateos MA et al., 2015	-22.2	0.251721	low	high	high	high	high	high	low	high	high	high
GGCCTGCCCCTCGCGCTGAC	C) Moreno Mateos MA et al., 2015	-22.9	0.26352	high	high	high	high	high	high	high	high	high	high
GGCCTGCTGTGGCTGCAGCT	C) Moreno Mateos MA et al., 2015	-29.8	0.196657	low	high	high	high	high	high	high	high	low	high
GGCCTGGAGAAGTCTGTACG	C) Moreno Mateos MA et al., 2015	-26	0.765978	low	high	high	high	high	high	low	high	high	high
GGCCTGGGGGAGAAAGTAGA	C) Moreno Mateos MA et al., 2015	-24.8	0.699115	low	high	high	high	high	high	low	high	high	high
GGCCTGTAGACAAAAAGGTC	C) Moreno Mateos MA et al., 2015	-24.6	0.308751	low	high	high	high	high	high	low	high	high	high
GGCCTGTCAGAGAAGAAGGA	C) Moreno Mateos MA et al., 2015	-21.6	0.14061	low	high	high	high	high	high	low	high	high	high
GGCCTTCCTTCACTGGAGAG	C) Moreno Mateos MA et al., 2015	-25.4	0.649951	high	high	high	high	high	high	high	high	high	high
GGCCTTGAGGGAATCGGGCG	C) Moreno Mateos MA et al., 2015	-26.4	0.529007	low	high	high	high	high	low	low	high	high	high
GGCCTTGGGATGGGCAGCAC	C) Moreno Mateos MA et al., 2015	-30.4	0.853491	high	high	high	high	high	high	high	high	high	high
GGCGACATCTTTCCTCCTGA	C) Moreno Mateos MA et al., 2015	-21.1	0.184857	low	high	high	high	high	high	low	high	high	high
GGCGACGCCGCGCTCTGAGC	C) Moreno Mateos MA et al., 2015	-28.3	0.072763	low	low	high	high	high	high	high	high	high	low
GGCGACTGCGCATCAGGACT	C) Moreno Mateos MA et al., 2015	-27.3	0.60472	low	low	high	high	high	high	low	high	high	high
GGCGAGAATGGCCGTCCCAG	C) Moreno Mateos MA et al., 2015	-28.3	0.897738	high	high	high	high	high	high	high	high	high	high
GGCGAGCTTCTCCTTCGATA	C) Moreno Mateos MA et al., 2015	-24.5	0.280236	low	high	high	high	low	high	low	high	high	high
GGCGATGCAGCAAGTGACGA	C) Moreno Mateos MA et al., 2015	-22.9	0.505408	low	low	high	high	low	high	low	high	high	high
GGCGATTTGATCCCACAAGA	C) Moreno Mateos MA et al., 2015	-20.7	0.230088	low	low	high	high	high	high	low	high	high	low
GGCGCAGAACCAAGCAGACA	C) Moreno Mateos MA et al., 2015	-22.9	0.462144	low	low	high	high	low	high	low	high	high	high
GGCGCAGGACTTCCTGGCTG	C) Moreno Mateos MA et al., 2015	-29	0.73648	high	high	high	high	high	high	high	high	high	high
GGCGCATGCGCTCCGGAACT	C) Moreno Mateos MA et al., 2015	-25.6	0.290069	low	low	high	high	high	high	low	high	high	high
GGCGCCAAAACAGGAGCGTC	C) Moreno Mateos MA et al., 2015	-24.3	0.497542	high	high	high	high	high	high	high	high	high	high
GGCGCCACCAGGTAGTACTG	C) Moreno Mateos MA et al., 2015	-26.2	0.295969	low	low	high	high	high	high	low	high	high	high
GGCGCCCTTGGTGCGGATGG	C) Moreno Mateos MA et al., 2015	-33.7	0.922321	low	low	high	high	high	high	high	high	high	low
GGCGCGGAAGCAGAACTCGT	C) Moreno Mateos MA et al., 2015	-26	0.403147	low	high	high	high	high	high	low	high	high	high
GGCGCGGGAGTATTTCTGCT	C) Moreno Mateos MA et al., 2015	-25.4	0.26942	low	high	high	high	high	high	low	high	low	high
GGCGCTGTGGAGCTATGGCT	C) Moreno Mateos MA et al., 2015	-26.1	0.584071	low	high	high	high	high	high	low	high	high	high
GGCGCTTTTGAGCCATCAGG	C) Moreno Mateos MA et al., 2015	-26.8	0.775811	low	low	high	high	high	high	low	high	high	low
GGCGGAGAGGAGTCCGGTTT	C) Moreno Mateos MA et al., 2015	-29.6	0.892822	low	high	high	high	low	high	low	high	high	high
GGCGGAGTACGACGACTACA	C) Moreno Mateos MA et al., 2015	-25.5	0.0403147	low	high	high	high	high	high	low	high	high	high
GGCGGCGCTCAGAGACGGGC	C) Moreno Mateos MA et al., 2015	-26.2	0.217306	low	low	high	high	high	high	high	high	high	low
GGCGGCGCTGTCGGGTCTTA	C) Moreno Mateos MA et al., 2015	-30.1	0.698132	low	low	high	high	low	high	low	high	high	high
GGCGGCTCGCCGGAGGGCGG	C) Moreno Mateos MA et al., 2015	-30.6	0.906588	low	high	high	high	high	high	low	low	high	high
GGCGGCTCTTGGTAAGCAGT	C) Moreno Mateos MA et al., 2015	-28.2	0.663717	low	high	high	high	high	high	low	high	high	high
GGCGGCTGAGACAGTGCAGC	C) Moreno Mateos MA et al., 2015	-25.6	0.758112	low	low	high	high	high	high	high	high	high	low
GGCGGGCAGGGTCATGAAGA	C) Moreno Mateos MA et al., 2015	-28.2	0.211406	low	high	high	high	high	high	low	high	high	high
GGCGGTAAAGGTTCTGGAGC	C) Moreno Mateos MA et al., 2015	-27	0.144543	high	high	high	high	high	high	high	high	high	high
GGCGGTGGGCCCTGGTAGCT	C) Moreno Mateos MA et al., 2015	-28.2	0.319567	low	high	high	high	high	high	low	high	high	high
GGCGGTGGTGGGAGCCCTAT	C) Moreno Mateos MA et al., 2015	-31	0.965585	low	high	high	high	high	high	low	high	high	high
GGCGTAACCGGGTGCCTGCG	C) Moreno Mateos MA et al., 2015	-28.6	0.785644	high	high	high	high	high	high	high	high	high	high
GGCGTCACAGCGCATGCAGG	C) Moreno Mateos MA et al., 2015	-25	0.3353	high	high	high	high	high	high	high	high	high	high
GGCGTCCCTCTTCCAGGGGT	C) Moreno Mateos MA et al., 2015	-24.7	0.740413	low	low	high	high	high	high	high	high	low	low
GGCGTGAGGGAGTGTTTCAT	C) Moreno Mateos MA et al., 2015	-27.9	0.0875123	low	high	high	high	high	high	low	high	high	high
GGCGTGCACCAACTGGAAGC	C) Moreno Mateos MA et al., 2015	-23.6	0.579154	high	high	high	high	high	high	high	high	high	high
GGCGTGGAGGAGGTCTAGAT	C) Moreno Mateos MA et al., 2015	-27.3	0.374631	low	high	high	high	high	high	low	high	high	high
GGCGTGGCCTTCAATCAGGA	C) Moreno Mateos MA et al., 2015	-29	0.0383481	low	high	high	high	high	high	low	high	high	high
GGCGTGGCTCTTTGAGTCCC	C) Moreno Mateos MA et al., 2015	-27.6	0.523107	high	high	high	high	high	high	high	high	high	high
GGCGTGGGTAGTGTGTTACT	C) Moreno Mateos MA et al., 2015	-27.1	0.637168	low	high	high	high	low	high	low	high	high	high
GGCGTTAGAGGGTTTTCCAA	C) Moreno Mateos MA et al., 2015	-24.7	0.39823	low	high	high	high	high	high	low	high	high	high
GGCGTTTGAGGACGGGATGC	C) Moreno Mateos MA et al., 2015	-27.7	0.348083	high	high	high	high	high	high	high	high	high	high
GGCTAACAAGCCTGACTTGA	C) Moreno Mateos MA et al., 2015	-25.4	0.428712	low	low	high	high	high	high	low	high	high	high
GGCTACAACCTTCCCCATTG	C) Moreno Mateos MA et al., 2015	-23	0.6647	low	high	high	high	high	high	low	high	high	high
GGCTACAGTACACAAGGTTA	C) Moreno Mateos MA et al., 2015	-22.1	0.117011	low	low	high	high	high	high	low	high	high	high
GGCTACCACGGCTCCATTGT	C) Moreno Mateos MA et al., 2015	-24.1	0.586037	low	high	high	high	high	high	low	high	high	high
GGCTACCCCAATAGATGGAC	C) Moreno Mateos MA et al., 2015	-24.6	0.19174	low	high	high	high	high	high	low	high	high	high
GGCTACTACCATCACTGGAG	C) Moreno Mateos MA et al., 2015	-23.1	0.412979	high	high	high	high	high	high	high	high	high	high
GGCTACTGATATGCATCCTA	C) Moreno Mateos MA et al., 2015	-24.9	0.183874	low	low	high	high	low	high	low	high	high	high
GGCTAGACTCAAAACAAAGA	C) Moreno Mateos MA et al., 2015	-26.4	0.494592	low	low	high	high	high	high	low	low	high	low
GGCTAGAGCTGAACACTGGT	C) Moreno Mateos MA et al., 2015	-25.7	0.254671	low	low	high	high	high	high	low	high	high	low
GGCTAGGCGATGGAGAGTTT	C) Moreno Mateos MA et al., 2015	-28.8	0.199607	low	high	high	high	low	high	low	high	high	high
GGCTAGTGTTTAACAGTTGA	C) Moreno Mateos MA et al., 2015	-25.7	0.441495	low	high	high	high	high	high	low	low	high	high
GGCTATCTTGGAGTAGGTCG	C) Moreno Mateos MA et al., 2015	-27.3	0.0452311	high	high	high	high	high	high	high	high	high	high
GGCTCAAGCGTATTGGTCCC	C) Moreno Mateos MA et al., 2015	-29.2	0.381514	high	high	high	high	high	high	high	high	high	high
GGCTCACACGATGCAGTGGA	C) Moreno Mateos MA et al., 2015	-25.2	0.756146	low	low	high	high	high	high	low	high	high	low
GGCTCAGACGCCCCCCGGCC	C) Moreno Mateos MA et al., 2015	-28.3	0.354966	low	low	high	high	high	high	low	low	high	low
GGCTCAGATCAAGGTAAGGA	C) Moreno Mateos MA et al., 2015	-22.1	0	low	high	high	high	high	high	low	high	high	high
GGCTCATCCTCCTCAGTACG	C) Moreno Mateos MA et al., 2015	-23.5	0.709931	low	low	high	high	high	high	low	high	high	low
GGCTCATGGTGACGTTCATT	C) Moreno Mateos MA et al., 2015	-26.5	0.695182	low	high	high	high	low	high	low	high	high	high
GGCTCATGTATTGATCAGAG	C) Moreno Mateos MA et al., 2015	-21.1	0.814159	low	low	high	high	high	high	low	high	high	low
GGCTCCAAAAGGATGGTCTC	C) Moreno Mateos MA et al., 2015	-28.9	0.446411	high	high	high	high	high	high	high	high	high	high
GGCTCCAAATGAGGCACATC	C) Moreno Mateos MA et al., 2015	-26.5	0.456244	low	low	high	high	high	high	low	high	high	low
GGCTCCACCCTCAGAGCCGC	C) Moreno Mateos MA et al., 2015	-26.7	0.127827	high	high	high	high	high	high	high	high	high	high
GGCTCCACCTGCTCACACTG	C) Moreno Mateos MA et al., 2015	-23.4	0.20944	low	low	high	high	high	high	low	high	high	high
GGCTCCGCCCCCTAGCAGCA	C) Moreno Mateos MA et al., 2015	-26.6	0.419862	low	high	high	high	high	low	high	high	high	high
GGCTCGGGAGGGGTCTGTGG	C) Moreno Mateos MA et al., 2015	-24.9	0.432645	low	high	high	high	high	high	high	high	high	low
GGCTCTACCTCTGTGTGTGA	C) Moreno Mateos MA et al., 2015	-27.7	0.593904	low	low	high	high	high	high	low	high	high	low
GGCTCTAGGGTCAGGGTAAC	C) Moreno Mateos MA et al., 2015	-26.4	0.882989	low	low	high	high	high	high	low	high	high	low
GGCTCTCTGGTTGACCTTTG	C) Moreno Mateos MA et al., 2015	-24.7	0.345133	low	high	high	high	high	high	low	high	high	low
GGCTCTGAGTTAGAGGTGAG	C) Moreno Mateos MA et al., 2015	-25.9	0.476893	low	low	high	high	high	high	high	high	high	low
GGCTCTGATCATAATCCAGG	C) Moreno Mateos MA et al., 2015	-25.4	0.06588	low	low	high	high	high	high	high	high	high	low
GGCTCTGCTCCGCTCCTCTG	C) Moreno Mateos MA et al., 2015	-26.3	0.305801	low	low	high	high	high	high	high	high	high	low
GGCTCTTCCCACACTGGAAA	C) Moreno Mateos MA et al., 2015	-24.3	0.233038	low	low	high	high	high	high	low	high	high	low
GGCTGAACCAACTCTTTACT	C) Moreno Mateos MA et al., 2015	-20.6	0.12586	low	low	high	high	high	high	low	high	high	low
GGCTGAAGAGGACGACGAGG	C) Moreno Mateos MA et al., 2015	-26.2	0.79646	high	high	high	high	high	high	high	high	high	high
GGCTGAAGAGGTCTGGACAT	C) Moreno Mateos MA et al., 2015	-28.5	0.737463	low	high	high	high	high	high	low	high	high	high
GGCTGAGCAATGTGTGATGC	C) Moreno Mateos MA et al., 2015	-22.4	0.292035	low	low	high	high	high	high	low	high	high	low
GGCTGAGCATCAGACTCTGC	C) Moreno Mateos MA et al., 2015	-24.5	0.0619469	low	high	high	high	high	high	high	high	high	low
GGCTGAGGGAGCGGGTGGAA	C) Moreno Mateos MA et al., 2015	-26.4	0.575221	low	high	high	high	high	high	low	high	high	high
GGCTGCAAGCGCAAGACAAA	C) Moreno Mateos MA et al., 2015	-21.4	0.013766	low	low	high	high	low	high	low	high	high	high
GGCTGCACTGGCTGCTGCTG	C) Moreno Mateos MA et al., 2015	-26.9	0.244838	low	low	high	high	high	high	high	high	high	high
GGCTGCAGATGAAGGTGGAG	C) Moreno Mateos MA et al., 2015	-24.1	0.449361	high	high	high	high	high	high	high	high	high	high
GGCTGCATCAATTGAGATAC	C) Moreno Mateos MA et al., 2015	-21.2	0.00491642	low	low	high	high	high	high	low	high	high	low
GGCTGCCCACCACGGGGCAG	C) Moreno Mateos MA et al., 2015	-29.4	0.161259	high	high	high	high	high	high	high	high	high	high
GGCTGCCCGCACAAAGATGG	C) Moreno Mateos MA et al., 2015	-24.4	0.361849	low	low	high	high	high	high	low	high	high	low
GGCTGCCGACCCACCGGCAC	C) Moreno Mateos MA et al., 2015	-25.6	0.554572	low	low	high	high	high	high	high	high	high	low
GGCTGCCGCTGGCGATGGTC	C) Moreno Mateos MA et al., 2015	-26.5	0.101278	low	high	high	high	high	high	low	high	high	high
GGCTGCTTTTGTCAATGATG	C) Moreno Mateos MA et al., 2015	-23.4	0.126844	low	high	high	high	high	high	low	high	high	high
GGCTGGAATTTCTTGCTACG	C) Moreno Mateos MA et al., 2015	-24.4	0.185841	low	low	high	high	high	high	high	high	high	high
GGCTGGACATGACTCCTGCG	C) Moreno Mateos MA et al., 2015	-24.9	0.136676	high	high	high	high	high	high	high	high	high	high
GGCTGGCACATCAGCCCTGC	C) Moreno Mateos MA et al., 2015	-26.4	0.145526	high	high	high	high	high	high	high	high	high	high
GGCTGGCACTGTTAGCACCA	C) Moreno Mateos MA et al., 2015	-25.4	0.930187	low	low	high	high	high	high	high	high	high	high
GGCTGGCCCGCAACTACATC	C) Moreno Mateos MA et al., 2015	-27.3	0.20059	low	high	high	high	high	high	low	high	high	high
GGCTGGCGCGAGACACGGTG	C) Moreno Mateos MA et al., 2015	-25.9	0.863324	low	high	high	high	high	low	high	high	high	high
GGCTGGTAAAGAGAAGAGGC	C) Moreno Mateos MA et al., 2015	-25.4	0.141593	high	high	high	high	high	high	high	high	high	high
GGCTGTAATCGGGGGTCAGC	C) Moreno Mateos MA et al., 2015	-25.4	0.3235	high	high	high	high	high	high	high	high	high	high
GGCTGTACTGTCTTCAGGTT	C) Moreno Mateos MA et al., 2015	-26.3	0.759095	low	low	high	high	high	high	low	high	high	low
GGCTGTAGTTGAGACTGAGG	C) Moreno Mateos MA et al., 2015	-25	0.718781	low	low	high	high	low	high	high	high	high	low
GGCTGTATGGTAGCTGGATG	C) Moreno Mateos MA et al., 2015	-29.1	0.555556	low	low	high	high	low	high	low	high	high	high
GGCTGTCTGGAAGCACCGAG	C) Moreno Mateos MA et al., 2015	-26.2	0.85939	low	low	high	high	high	high	high	high	high	low
GGCTGTGCTTGAGCAAGTCT	C) Moreno Mateos MA et al., 2015	-25.5	0.0914454	low	high	high	high	high	high	low	high	high	high
GGCTGTGGGGCTCTGCCTGT	C) Moreno Mateos MA et al., 2015	-32.9	0.656834	high	high	high	high	high	high	high	high	high	high
GGCTGTGGTAACCGCTGCTT	C) Moreno Mateos MA et al., 2015	-30.4	0.720747	low	high	high	high	low	high	low	high	high	high
GGCTGTTGCTGGTGTGTAGG	C) Moreno Mateos MA et al., 2015	-24.7	0.274336	low	low	high	high	high	high	low	high	high	low
GGCTGTTTGTCTTCCTGGGC	C) Moreno Mateos MA et al., 2015	-24	0.261554	high	high	high	high	high	high	high	high	high	high
GGCTGTTTTTGTCTCGGTTG	C) Moreno Mateos MA et al., 2015	-26.4	0.142576	low	low	high	high	high	high	high	high	high	low
GGCTTAGGAGCCACAGGTGG	C) Moreno Mateos MA et al., 2015	-27.3	0.981318	low	low	high	high	high	high	high	high	high	low
GGCTTCAAGTCCCAGAGCAT	C) Moreno Mateos MA et al., 2015	-25.1	0.612586	low	high	high	high	high	high	low	high	high	low
GGCTTCAGCAGAGATTAAAG	C) Moreno Mateos MA et al., 2015	-20.8	0.643068	low	high	high	high	high	high	low	high	high	high
GGCTTCTTAACATCTGCTGG	C) Moreno Mateos MA et al., 2015	-23.8	0.226155	high	high	high	high	high	high	high	high	high	high
GGCTTTCAGAGCCCCGCCCA	C) Moreno Mateos MA et al., 2015	-28.7	0.717797	low	high	high	high	high	high	high	high	low	high
GGCTTTCCAAGGCACCGAGG	C) Moreno Mateos MA et al., 2015	-25.8	0.565388	low	low	high	high	high	high	high	high	high	low
GGCTTTCTCCTGGAGTCCAA	C) Moreno Mateos MA et al., 2015	-23.7	0.225172	low	high	high	high	high	high	low	high	high	high
GGCTTTCTGTGTGCTGAATG	C) Moreno Mateos MA et al., 2015	-24.8	0.0186824	low	low	high	high	high	high	low	high	high	low
GGCTTTGGAGCGGGATCAAT	C) Moreno Mateos MA et al., 2015	-28.5	0.343166	low	low	high	high	high	high	low	high	high	low
GGCTTTTAGATACTGCGCCA	C) Moreno Mateos MA et al., 2015	-24.5	0.303835	high	high	high	high	high	high	high	high	high	high
GGCTTTTCAGATGAGACGGA	C) Moreno Mateos MA et al., 2015	-28.1	0.973451	low	high	high	high	high	high	high	high	high	low
GGCTTTTCAGGGGACATGTA	C) Moreno Mateos MA et al., 2015	-27.5	0.783677	low	high	high	high	high	high	low	high	high	low
GGCTTTTGGGCTTGAACTCT	C) Moreno Mateos MA et al., 2015	-26.5	0.353982	low	high	high	high	high	high	low	high	high	high
GGGAAAAGTCTTGATTCACT	C) Moreno Mateos MA et al., 2015	-25.8	0.52409	low	high	high	high	high	high	low	low	high	high
GGGAAACCTTGACAATCTTG	C) Moreno Mateos MA et al., 2015	-23.4	0.0668633	low	low	high	high	high	high	low	high	high	low
GGGAACAATACGACGCGAGC	C) Moreno Mateos MA et al., 2015	-22.1	0.170108	high	high	high	high	high	high	high	high	high	high
GGGAACTCCTCAAACACAGC	C) Moreno Mateos MA et al., 2015	-20.9	0.755162	high	high	high	high	high	high	high	high	high	high
GGGAACTGCTGGGACATAAG	C) Moreno Mateos MA et al., 2015	-23.5	0.383481	low	high	high	high	high	high	low	high	high	high
GGGAACTGGGAGCTCCAGTT	C) Moreno Mateos MA et al., 2015	-26.1	0.270403	low	high	high	high	low	high	low	high	high	high
GGGAACTTCCTATTTGTGTT	C) Moreno Mateos MA et al., 2015	-25.6	0.387414	low	high	high	high	high	high	low	low	high	high
GGGAACTTGGAAGTGCCCCT	C) Moreno Mateos MA et al., 2015	-28.7	0.763029	high	high	high	high	high	high	high	high	high	high
GGGAACTTTCTTGGGAATGG	C) Moreno Mateos MA et al., 2015	-21.7	0.73353	low	high	high	high	high	high	low	high	high	high
GGGAAGACCGCAGGATGCTG	C) Moreno Mateos MA et al., 2015	-27.1	0.420846	low	high	high	high	high	high	low	high	high	high
GGGAAGAGTGCGGCCGGGAA	C) Moreno Mateos MA et al., 2015	-25.9	0.932153	high	high	high	high	high	high	high	high	high	high
GGGAAGATTTTGGACTATTT	C) Moreno Mateos MA et al., 2015	-31.4	0.242871	low	high	high	high	high	high	low	low	high	high
GGGAAGGTCACCACAGGGCG	C) Moreno Mateos MA et al., 2015	-25.1	0.757129	low	low	high	high	high	low	high	high	high	high
GGGAAGTGTCTGAGTCTGGT	C) Moreno Mateos MA et al., 2015	-25	0.687316	low	high	high	high	high	high	low	high	high	high
GGGAATCAAATCTGGCCTGA	C) Moreno Mateos MA et al., 2015	-30.8	0.262537	high	high	high	high	high	high	high	high	high	high
GGGAATCACTGACGGTTTCT	C) Moreno Mateos MA et al., 2015	-25	0.495575	low	high	high	high	low	high	low	high	high	high
GGGAATGCGCTCTGTTTCTG	C) Moreno Mateos MA et al., 2015	-28.6	0.346116	low	low	high	high	high	high	low	high	high	low
GGGAATGTAAGCAGAGCAGC	C) Moreno Mateos MA et al., 2015	-23.7	0.160275	high	high	high	high	high	high	high	high	high	high
GGGAATTAGAAACCCTTCCT	C) Moreno Mateos MA et al., 2015	-24.7	0.0147493	low	high	high	high	high	high	low	high	high	high
GGGACCATTCGGTGGGATTT	C) Moreno Mateos MA et al., 2015	-28.8	0.680433	low	low	high	high	high	high	low	high	high	low
GGGACCCAGAGGAGGCAGAA	C) Moreno Mateos MA et al., 2015	-23.9	0.822026	low	high	high	high	high	high	low	high	high	high
GGGACCCTCCTGACCCAGAA	C) Moreno Mateos MA et al., 2015	-23.3	0.241888	low	high	high	high	high	high	low	high	high	high
GGGACCCTGCCGACACTGGC	C) Moreno Mateos MA et al., 2015	-27.7	0.6706	high	high	high	high	high	high	high	high	high	high
GGGACCCTTCCATCCACATG	C) Moreno Mateos MA et al., 2015	-23.8	0.877089	low	high	high	high	high	high	low	high	high	high
GGGACCGCATGCGCCGCGTC	C) Moreno Mateos MA et al., 2015	-25.8	0.488692	high	high	high	high	high	high	high	high	high	high
GGGACTGGACCTGGCGCTTG	C) Moreno Mateos MA et al., 2015	-32.3	0.896755	low	low	high	high	low	high	high	high	high	high
GGGACTGGGACTGACTCCAG	C) Moreno Mateos MA et al., 2015	-29	0.987217	high	high	high	high	high	high	high	high	high	high
GGGAGAACCTGCTTTGTCAA	C) Moreno Mateos MA et al., 2015	-25.5	0.728614	low	low	high	high	high	high	low	high	high	low
GGGAGAAGGAGACTTTGAGC	C) Moreno Mateos MA et al., 2015	-25.2	0.0442478	low	high	high	high	high	high	low	high	high	high
GGGAGAATAGTAGGGCGCTG	C) Moreno Mateos MA et al., 2015	-26.1	0.671583	low	low	high	high	high	high	high	high	high	high
GGGAGACATGGATGAACTTG	C) Moreno Mateos MA et al., 2015	-27.1	0.984267	low	high	high	high	high	high	low	high	high	high
GGGAGAGGAAGATGCAGCGG	C) Moreno Mateos MA et al., 2015	-23.9	0.762045	high	high	high	high	high	high	high	high	high	high
GGGAGAGGAGACCAAATCCG	C) Moreno Mateos MA et al., 2015	-23.1	0.54179	low	low	high	high	high	high	low	high	high	high
GGGAGAGGCTGCTCTCTGGG	C) Moreno Mateos MA et al., 2015	-26.1	0.924287	high	high	high	high	high	high	high	high	high	high
GGGAGAGTCGTGACGGCTGC	C) Moreno Mateos MA et al., 2015	-29.5	0.743363	high	high	high	high	high	high	high	high	high	high
GGGAGAGTGTGTCAGTGCTC	C) Moreno Mateos MA et al., 2015	-22.5	0.379548	low	low	high	high	high	high	high	high	high	low
GGGAGCCAGCGGCGCTGGAT	C) Moreno Mateos MA et al., 2015	-29.7	0.447394	low	high	high	high	high	high	low	high	high	high
GGGAGCCAGTCCCGTCAGCA	C) Moreno Mateos MA et al., 2015	-26.1	0.968535	low	high	high	high	high	low	low	high	high	high
GGGAGGATGTTGCTCCATGG	C) Moreno Mateos MA et al., 2015	-24	0.974435	high	high	high	high	high	high	high	high	high	high
GGGAGGATTGCCCGAGAGAG	C) Moreno Mateos MA et al., 2015	-25.9	0.92822	low	high	high	high	high	high	low	high	high	high
GGGAGGCTGGCTCCGTTTGG	C) Moreno Mateos MA et al., 2015	-27.9	0.848574	low	high	high	high	high	high	low	high	high	high
GGGAGGGCCGTTGTTTCTGG	C) Moreno Mateos MA et al., 2015	-31.9	0.638151	low	low	high	high	high	high	low	high	high	high
GGGAGGTGGATTGGTAGCCT	C) Moreno Mateos MA et al., 2015	-31.8	0.276303	low	high	high	high	high	high	low	high	high	high
GGGAGTGGGCCTGTAAGCAG	C) Moreno Mateos MA et al., 2015	-27.3	0.945919	low	low	high	high	high	high	low	high	high	high
GGGATAACTGGGGGTTGACT	C) Moreno Mateos MA et al., 2015	-28.5	0.744346	low	high	high	high	high	high	low	high	high	high
GGGATCTCACGCTCATCAAA	C) Moreno Mateos MA et al., 2015	-21	0.158309	low	low	high	high	high	high	low	high	high	low
GGGATCTGCCGAAGCAGCAG	C) Moreno Mateos MA et al., 2015	-26.8	0.553589	high	high	high	high	high	high	high	high	high	high
GGGATCTTGAATGGTGGGAT	C) Moreno Mateos MA et al., 2015	-23.5	0.539823	low	high	high	high	high	high	low	high	high	high
GGGATGAAGCAGAAGCAGCC	C) Moreno Mateos MA et al., 2015	-25.9	0.498525	high	high	high	high	high	high	high	high	high	high
GGGATGGGTATCCTGAGGGG	C) Moreno Mateos MA et al., 2015	-24.2	0.967552	high	high	high	high	high	high	high	high	high	high
GGGATGTTTTCCACACTAGA	C) Moreno Mateos MA et al., 2015	-23.9	0.250737	low	high	high	high	high	high	low	high	high	high
GGGATTCCCTCACCTGGCTG	C) Moreno Mateos MA et al., 2015	-28.7	0.577188	high	high	high	high	high	high	high	high	high	high
GGGATTGGGCCATATTCAAC	C) Moreno Mateos MA et al., 2015	-26.5	0.641101	low	low	high	high	high	high	low	high	high	high
GGGATTTTGAACAGCAGAAC	C) Moreno Mateos MA et al., 2015	-23.2	0.382498	low	high	high	high	high	high	low	high	high	high
GGGCAAACCCGGTGACAGTC	C) Moreno Mateos MA et al., 2015	-28.2	0.143559	low	high	high	high	high	high	low	high	high	high
GGGCAACCAGCAGATGAGGA	C) Moreno Mateos MA et al., 2015	-24.7	0.0766962	low	high	high	high	high	high	low	high	high	high
GGGCAAGTATGAGACTCTGG	C) Moreno Mateos MA et al., 2015	-25.8	0.669617	low	high	high	high	high	high	high	high	high	low
GGGCACAGTTTCCCGGGCGG	C) Moreno Mateos MA et al., 2015	-27.7	0.952802	low	low	high	high	high	high	low	high	high	high
GGGCACATGATGGGTAGGAC	C) Moreno Mateos MA et al., 2015	-26.9	0.481809	low	high	high	high	high	high	low	high	high	high
GGGCACCAGTGTGCACGTTG	C) Moreno Mateos MA et al., 2015	-24.5	0.73058	low	low	high	high	high	high	low	high	low	high
GGGCAGCATCCCTCAATAGC	C) Moreno Mateos MA et al., 2015	-24.1	0.426745	low	high	high	high	high	high	low	high	high	high
GGGCAGCTCCAGTCCACCTG	C) Moreno Mateos MA et al., 2015	-27.9	0.957719	low	low	high	high	high	high	high	high	high	high
GGGCAGTAGGGACACACTAC	C) Moreno Mateos MA et al., 2015	-24.9	0.33825	low	high	high	high	high	high	low	high	high	high
GGGCAGTCTGTGCGCGGTGA	C) Moreno Mateos MA et al., 2015	-25.6	0.99705	high	high	high	high	high	high	high	high	high	high
GGGCAGTTTCTTCTCAAGTT	C) Moreno Mateos MA et al., 2015	-25.6	0.0432645	low	high	high	high	high	high	low	high	high	high
GGGCATCAGTCCCATCCCAG	C) Moreno Mateos MA et al., 2015	-23.8	0.916421	high	high	high	high	high	high	high	high	high	high
GGGCATGAGGGATCCGGTGC	C) Moreno Mateos MA et al., 2015	-27.1	0.602753	high	high	high	high	high	high	high	high	high	high
GGGCCAACCATGTGAGACAC	C) Moreno Mateos MA et al., 2015	-23.1	0.857424	low	high	high	high	high	high	low	high	high	high
GGGCCAAGCTCATCTTTCAG	C) Moreno Mateos MA et al., 2015	-24.8	0.377581	low	low	high	high	high	high	low	high	high	low
GGGCCAGCAGCCTATGGGTC	C) Moreno Mateos MA et al., 2015	-27	0.954769	high	high	high	high	high	high	high	high	high	high
GGGCCAGGAAAGTATGGCTC	C) Moreno Mateos MA et al., 2015	-27.3	0.163225	high	high	high	high	high	high	high	high	high	high
GGGCCCAACCATGTAGGAAA	C) Moreno Mateos MA et al., 2015	-22.3	0.159292	low	low	high	high	high	high	low	high	high	high
GGGCCCAAGTTGGAGGCAGC	C) Moreno Mateos MA et al., 2015	-28.4	0.787611	low	high	high	high	high	high	high	high	high	low
GGGCCCAGGTGGGACTCAGA	C) Moreno Mateos MA et al., 2015	-25.1	0.511308	low	high	high	high	high	high	low	high	high	high
GGGCCGGTTCTGGTGCAGGC	C) Moreno Mateos MA et al., 2015	-27.8	0.825959	low	high	high	high	high	high	high	high	high	low
GGGCCGTGTGGTGACATTGC	C) Moreno Mateos MA et al., 2015	-27.2	0.59882	low	low	high	high	high	high	low	high	high	high
GGGCCTAGAGGATGGGCAGG	C) Moreno Mateos MA et al., 2015	-29.2	0.878073	high	high	high	high	high	high	high	high	high	high
GGGCCTCCACATTCACAGAC	C) Moreno Mateos MA et al., 2015	-21.4	0.181908	low	high	high	high	high	high	low	high	high	high
GGGCCTTCTTCAGATACATG	C) Moreno Mateos MA et al., 2015	-23.4	0.748279	low	high	high	high	high	high	low	high	high	high
GGGCCTTGTGCTCCCTGGCA	C) Moreno Mateos MA et al., 2015	-26.9	0.93412	low	low	high	high	high	low	high	high	high	high
GGGCGATGTGGCCTGTGCCC	C) Moreno Mateos MA et al., 2015	-28.9	0.559489	high	high	high	high	high	high	high	high	high	high
GGGCGCCTATGCACTAGAGC	C) Moreno Mateos MA et al., 2015	-27.4	0.847591	low	high	high	high	high	high	low	high	high	high
GGGCGCTCAAATCCCCTGTT	C) Moreno Mateos MA et al., 2015	-24.8	0.406096	low	high	high	high	high	high	low	high	high	high
GGGCGGAGCAATGAAACAAA	C) Moreno Mateos MA et al., 2015	-24.3	0.252704	low	low	high	high	high	high	low	high	high	high
GGGCGGCATCGACACATCCC	C) Moreno Mateos MA et al., 2015	-23.4	0.0943953	high	high	high	high	high	high	high	high	high	high
GGGCGGGAGCTTGGTTTAGG	C) Moreno Mateos MA et al., 2015	-27.4	0.885939	low	high	high	high	high	high	low	high	high	high
GGGCTCAGAGCTGGTGCAGA	C) Moreno Mateos MA et al., 2015	-28	0.279253	low	low	high	high	high	high	low	high	high	low
GGGCTCATACATTCCCAAAA	C) Moreno Mateos MA et al., 2015	-21.6	0.713864	low	low	high	high	high	high	low	high	high	high
GGGCTCCAACCCGACACACT	C) Moreno Mateos MA et al., 2015	-24.7	0.941986	low	high	high	high	high	high	low	high	high	high
GGGCTCCACCGCAGACAAGC	C) Moreno Mateos MA et al., 2015	-26.6	0.624385	low	high	high	high	high	high	low	high	high	high
GGGCTCCCAGGATGGGGGGA	C) Moreno Mateos MA et al., 2015	-27.5	0.506391	low	low	high	high	high	high	high	high	high	low
GGGCTCCCTTGAGGAGGGTG	C) Moreno Mateos MA et al., 2015	-27.1	0.807276	low	high	high	high	high	low	high	high	low	high
GGGCTCGCCACAGGTCGATA	C) Moreno Mateos MA et al., 2015	-27.3	0.583088	low	high	high	high	high	high	low	high	high	high
GGGCTCTGCAGGACTGTGGT	C) Moreno Mateos MA et al., 2015	-28.2	0.947886	low	high	high	high	high	high	low	high	high	high
GGGCTCTGGTAGCTGCCCCA	C) Moreno Mateos MA et al., 2015	-30.1	0.486726	low	low	high	high	high	high	high	high	high	low
GGGCTGCCTGGGGCTAAGCC	C) Moreno Mateos MA et al., 2015	-32.6	0.311701	low	high	high	high	high	high	low	high	high	high
GGGCTGCGTTTGGGTTTAGG	C) Moreno Mateos MA et al., 2015	-26.4	0.969518	low	high	high	high	high	high	low	high	high	high
GGGCTGGAGTCGTACCCTGG	C) Moreno Mateos MA et al., 2015	-29.5	0.920354	high	high	high	high	high	high	high	high	high	high
GGGCTGGGTGTGTCTCTTCC	C) Moreno Mateos MA et al., 2015	-27	0.843658	low	high	high	high	high	high	low	high	high	high
GGGCTGTTGCTCTTCTTGAG	C) Moreno Mateos MA et al., 2015	-26.5	0.946903	low	high	high	high	high	high	low	high	high	high
GGGCTGTTTCTCCTTCACTA	C) Moreno Mateos MA et al., 2015	-25.5	0.236971	low	high	high	high	high	high	low	high	high	high
GGGCTTCAGAAAGCTCTGGT	C) Moreno Mateos MA et al., 2015	-27.2	0.365782	low	high	high	high	high	high	low	high	high	high
GGGCTTCTCAAGCAGGTATG	C) Moreno Mateos MA et al., 2015	-25.3	0.0157325	low	high	high	high	high	high	low	high	high	high
GGGCTTGATTGACAGCTGAG	C) Moreno Mateos MA et al., 2015	-28.1	0.881023	high	high	high	high	high	high	high	high	high	high
GGGGAAAGCAAAAGTTGTCC	C) Moreno Mateos MA et al., 2015	-21.9	0.105211	low	high	high	high	high	high	low	high	high	high
GGGGACAGCATGCCACGGGG	C) Moreno Mateos MA et al., 2015	-26.4	0.823009	high	high	high	high	high	high	high	high	high	high
GGGGACATGTACCCTTTCAG	C) Moreno Mateos MA et al., 2015	-26.3	0.964602	low	low	high	high	high	high	low	high	high	low
GGGGACCACCGCTACCACCG	C) Moreno Mateos MA et al., 2015	-23.9	0.858407	high	high	high	high	high	high	high	high	high	high
GGGGAGAATCATAACTGGGA	C) Moreno Mateos MA et al., 2015	-22	0.433628	low	low	high	high	low	high	high	high	high	high
GGGGAGAGACCTTTCGTGTG	C) Moreno Mateos MA et al., 2015	-24.3	0.540806	high	high	high	high	high	high	high	high	high	high
GGGGAGATTCTGATTGGCTG	C) Moreno Mateos MA et al., 2015	-30.4	0.0963618	low	high	high	high	high	high	high	high	high	low
GGGGAGGAGGAGAAACAGGC	C) Moreno Mateos MA et al., 2015	-22.4	0.139626	low	high	high	high	high	high	high	high	high	low
GGGGAGGGGGACAGACTCTT	C) Moreno Mateos MA et al., 2015	-31.5	0.999017	low	high	low	high	high	high	low	high	high	high
GGGGATGAAGGGGTTGTGGT	C) Moreno Mateos MA et al., 2015	-29.1	0.903638	low	high	high	high	high	high	low	high	high	low
GGGGATGACTGAAGTGGGAA	C) Moreno Mateos MA et al., 2015	-26.9	0.605703	low	high	high	high	high	high	low	high	high	low
GGGGATGCCGTAACCGTCAG	C) Moreno Mateos MA et al., 2015	-25.7	0.652901	low	low	high	high	high	high	high	high	high	high
GGGGATTCCATGGAGCAACG	C) Moreno Mateos MA et al., 2015	-25.1	0.0688299	low	high	high	high	high	high	high	high	high	low
GGGGCACTCTCTTTGGGCAT	C) Moreno Mateos MA et al., 2015	-26.1	0.255654	high	high	high	high	high	high	high	high	high	high
GGGGCATCTGATTCAGGAGA	C) Moreno Mateos MA et al., 2015	-24.9	0.416912	low	low	high	high	high	high	low	high	high	high
GGGGCATTACAGGGGTAGGA	C) Moreno Mateos MA et al., 2015	-24.6	0.976401	low	high	high	high	high	high	low	high	high	high
GGGGCCATGAGGCCGGGGTG	C) Moreno Mateos MA et al., 2015	-32.3	0.714848	low	low	high	high	high	low	high	high	high	high
GGGGCCTTCTGGTTCTGTGA	C) Moreno Mateos MA et al., 2015	-29.4	0.890855	low	low	high	high	high	high	low	high	high	high
GGGGCGAAGGCGGCACAGTT	C) Moreno Mateos MA et al., 2015	-28.9	0.712881	low	high	high	high	high	high	low	high	high	low
GGGGCTACTTCTGGTGTTAC	C) Moreno Mateos MA et al., 2015	-25.2	0.975418	low	high	high	high	high	high	low	high	high	high
GGGGCTAGGGTGAGAGTAAC	C) Moreno Mateos MA et al., 2015	-26.6	0.79056	low	low	high	high	high	high	low	high	high	high
GGGGCTCCAGGTGGGAGGTA	C) Moreno Mateos MA et al., 2015	-24.2	0.902655	low	low	high	high	high	low	low	high	high	high
GGGGCTCCATAGGTGGAGGC	C) Moreno Mateos MA et al., 2015	-25.8	0.831858	low	high	high	high	high	high	high	high	low	high
GGGGCTCTCGATCTTCGGGA	C) Moreno Mateos MA et al., 2015	-28.5	0.872173	low	low	high	high	high	high	high	high	low	low
GGGGCTGGGGGGTCCACCAT	C) Moreno Mateos MA et al., 2015	-29.7	0.995084	low	high	high	high	high	high	low	high	high	high
GGGGCTGGTCACTACGAGTC	C) Moreno Mateos MA et al., 2015	-29	0.966568	high	high	high	high	high	high	high	high	high	high
GGGGCTTGGAGAGGAACTGC	C) Moreno Mateos MA et al., 2015	-25.2	0.0560472	low	high	high	high	high	high	low	high	high	high
GGGGCTTTTGTTAGGCCTGG	C) Moreno Mateos MA et al., 2015	-30.9	0.518191	high	high	high	high	high	high	high	high	high	high
GGGGGACCTCCAGATGGAAT	C) Moreno Mateos MA et al., 2015	-25.2	0.423795	low	low	high	high	low	high	low	high	high	high
GGGGGAGCTGGAGATGGCCA	C) Moreno Mateos MA et al., 2015	-30.2	0.564405	low	high	high	high	high	high	high	high	high	low
GGGGGCTACAGGGGGCCCCG	C) Moreno Mateos MA et al., 2015	-30	0.339233	low	high	high	high	high	high	low	low	high	high
GGGGGCTCTCCAGTTGTTGG	C) Moreno Mateos MA et al., 2015	-25.2	0.700098	low	high	high	high	high	high	low	high	high	high
GGGGGGCAGTGCCAGTGGCT	C) Moreno Mateos MA et al., 2015	-27.2	0.293019	low	high	high	high	high	high	high	high	low	high
GGGGGTCCCTGAACGTCACC	C) Moreno Mateos MA et al., 2015	-22.2	0.155359	low	low	high	high	high	high	high	high	high	low
GGGGGTCGCCGAGGATTGAC	C) Moreno Mateos MA et al., 2015	-25.5	0.715831	low	low	high	high	high	high	low	high	high	high
GGGGGTCTGTCTCTGATGTC	C) Moreno Mateos MA et al., 2015	-25.2	0.330383	low	low	high	high	high	high	low	high	high	low
GGGGGTGAAGCAGCATCCTC	C) Moreno Mateos MA et al., 2015	-27	0.576205	low	high	high	high	high	high	low	high	high	high
GGGGGTGAAGGGGACTGGGA	C) Moreno Mateos MA et al., 2015	-31.6	0.609636	low	high	high	high	high	high	high	high	high	low
GGGGGTGGTGCAGGACGGGG	C) Moreno Mateos MA et al., 2015	-27.4	0.908555	low	high	high	high	high	high	high	high	high	low
GGGGTAAAGACAGCACCTGT	C) Moreno Mateos MA et al., 2015	-27.1	0.59587	low	high	high	high	high	high	low	high	high	high
GGGGTAGGCTGTGGGGGAGG	C) Moreno Mateos MA et al., 2015	-25.2	0.891839	high	high	high	high	high	high	high	high	high	high
GGGGTAGGGCCGCTCGTGCA	C) Moreno Mateos MA et al., 2015	-26.4	0.841691	high	high	high	high	high	high	high	high	high	high
GGGGTAGGGGCAGGTGGAGG	C) Moreno Mateos MA et al., 2015	-28.3	0.936087	high	high	high	high	high	high	high	high	high	high
GGGGTAGTAGGCTGGCTTTG	C) Moreno Mateos MA et al., 2015	-34.6	0.415929	low	low	high	high	high	high	low	high	high	high
GGGGTATCAGGGCCCAAGTA	C) Moreno Mateos MA et al., 2015	-26.1	0.888889	low	high	high	high	high	low	low	high	high	high
GGGGTCTGGAGGTGGTGGAA	C) Moreno Mateos MA et al., 2015	-25.3	0.811209	low	low	high	high	high	high	low	high	high	low
GGGGTCTTTGGGGCAAGGTT	C) Moreno Mateos MA et al., 2015	-27	0.944936	low	high	high	high	high	high	low	high	high	high
GGGGTGCATTGGGGTAGGTC	C) Moreno Mateos MA et al., 2015	-26.8	0.515241	low	high	high	high	high	high	low	high	high	high
GGGGTGGACGGGTGTGGAGA	C) Moreno Mateos MA et al., 2015	-27.3	0.689282	low	high	high	high	high	high	low	high	high	high
GGGGTGGTACAACGGCTCAG	C) Moreno Mateos MA et al., 2015	-25.6	0.884956	low	low	high	high	low	high	high	high	high	low
GGGGTGGTGGAGACAAAGCA	C) Moreno Mateos MA et al., 2015	-27	0.568338	low	high	high	high	high	low	low	high	high	high
GGGGTGTAGTTCCCCCTCCT	C) Moreno Mateos MA et al., 2015	-26.9	0.771878	high	high	high	high	high	high	high	high	high	high
GGGGTGTCTGATGGCCGCCA	C) Moreno Mateos MA et al., 2015	-28.2	0.960669	low	high	high	high	high	high	high	high	high	low
GGGGTTCAACTGCTGATCTT	C) Moreno Mateos MA et al., 2015	-27.7	0.810226	low	high	low	high	low	high	low	high	high	low
GGGGTTGGATCATACTAGGA	C) Moreno Mateos MA et al., 2015	-25.9	0.752212	low	high	high	high	high	high	low	high	high	low
GGGGTTGTTGGTATCACATT	C) Moreno Mateos MA et al., 2015	-24.3	0.66175	low	high	high	high	high	high	low	high	high	low
GGGGTTTGTATTTGTAATCT	C) Moreno Mateos MA et al., 2015	-20	0.117994	low	low	high	high	high	high	low	low	high	low
GGGTAACACAGCTGAATGAA	C) Moreno Mateos MA et al., 2015	-24.9	0.537856	low	high	high	high	high	high	low	high	high	high
GGGTACAGAGATCTCCTCAT	C) Moreno Mateos MA et al., 2015	-24	0.909538	low	high	high	high	high	high	low	high	high	high
GGGTACATTGGGAGTGCTGT	C) Moreno Mateos MA et al., 2015	-28.6	0.772861	low	high	high	high	high	high	low	high	high	high
GGGTAGATTTGGCAAACGAT	C) Moreno Mateos MA et al., 2015	-23.7	0.120944	low	high	high	high	high	high	low	high	high	high
GGGTAGTACGAGTGGAACAC	C) Moreno Mateos MA et al., 2015	-23.4	0.549656	low	high	high	high	high	high	low	high	high	high
GGGTATGGTGGTGGGCATCG	C) Moreno Mateos MA et al., 2015	-28.7	0.990167	low	high	high	high	high	high	high	high	high	low
GGGTCAACCCATTCTCTCTT	C) Moreno Mateos MA et al., 2015	-26.7	0.0324484	low	high	low	high	high	high	low	high	high	high
GGGTCAAGAGGTGATGGTGT	C) Moreno Mateos MA et al., 2015	-29	0.838741	low	low	high	high	low	high	low	high	high	low
GGGTCAAGTGAAGCTCCAAG	C) Moreno Mateos MA et al., 2015	-24.1	0.093412	low	high	high	high	high	high	low	high	high	low
GGGTCAATGGTAGTGACTGG	C) Moreno Mateos MA et al., 2015	-27.6	0.798427	low	high	high	high	high	high	high	high	high	low
GGGTCACAATATGGGAAACT	C) Moreno Mateos MA et al., 2015	-21.7	0.207473	low	high	high	high	high	high	low	high	high	high
GGGTCACCACTCCTCCGGGA	C) Moreno Mateos MA et al., 2015	-26.6	0.703048	low	low	high	high	high	high	high	high	high	low
GGGTCACTCCACCGTTCAGC	C) Moreno Mateos MA et al., 2015	-22.5	0.123894	low	low	high	high	high	high	low	high	high	low
GGGTCAGCAAGCCCGTCCCC	C) Moreno Mateos MA et al., 2015	-25.2	0.571288	high	high	high	high	high	high	high	high	high	high
GGGTCAGGGGGAGCGGTGGC	C) Moreno Mateos MA et al., 2015	-31.5	0.434612	low	high	high	high	high	high	high	high	high	low
GGGTCATGATGGCCACCCTC	C) Moreno Mateos MA et al., 2015	-28	0.883972	low	high	high	high	high	high	high	high	high	low
GGGTCCAAGTATGGGTTCTC	C) Moreno Mateos MA et al., 2015	-24	0.556539	low	high	high	high	high	high	low	high	high	low
GGGTCCTCAGTTTATGCAAA	C) Moreno Mateos MA et al., 2015	-19.9	0.215339	low	high	high	high	high	high	low	high	high	high
GGGTCGCCTGTGACAGCCAG	C) Moreno Mateos MA et al., 2015	-28.9	0.773845	high	high	high	high	high	high	high	high	high	high
GGGTCGTCTGAAGGGACCAA	C) Moreno Mateos MA et al., 2015	-24.6	0.839725	low	low	high	high	high	high	low	high	high	high
GGGTCGTGAGGTGGTCGCTC	C) Moreno Mateos MA et al., 2015	-24.4	0.0471976	high	high	high	high	high	high	high	high	high	high
GGGTCGTGTAGACAGACGGT	C) Moreno Mateos MA et al., 2015	-25.3	0.941003	high	high	high	high	high	high	high	high	high	high
GGGTCTGGTGCTGTGTGATG	C) Moreno Mateos MA et al., 2015	-25.9	0.437561	low	low	high	high	high	high	low	high	high	high
GGGTCTTCAATGCCGAGAAG	C) Moreno Mateos MA et al., 2015	-23.4	0.281219	low	low	high	high	high	high	low	high	high	low
GGGTGCCCAACTGCTCTCTG	C) Moreno Mateos MA et al., 2015	-26.6	0.781711	low	low	high	high	high	high	low	high	high	high
GGGTGCCCAGGAGGAGCCCT	C) Moreno Mateos MA et al., 2015	-32.5	0.815143	high	high	high	high	high	high	high	high	high	high
GGGTGCTGAGCAAGAGCGTG	C) Moreno Mateos MA et al., 2015	-25.3	0.901672	high	high	high	high	high	high	high	high	high	high
GGGTGGACGTCCAGAGACGC	C) Moreno Mateos MA et al., 2015	-24	0.334317	low	high	high	high	high	high	high	high	low	high
GGGTGGAGATATGCGTTCTT	C) Moreno Mateos MA et al., 2015	-26.6	0.569322	low	high	low	high	high	high	low	high	high	high
GGGTGGCCCATGGGTGGCAT	C) Moreno Mateos MA et al., 2015	-31	0.397247	low	high	high	high	high	high	low	high	high	high
GGGTGGCGGACTGTGAAACA	C) Moreno Mateos MA et al., 2015	-34.3	0.823992	low	high	high	high	high	high	low	high	high	high
GGGTGGGGAATTTTCTGTGC	C) Moreno Mateos MA et al., 2015	-23.6	0.286136	high	high	high	high	high	high	high	high	high	high
GGGTGGTGATCATGCAGTGA	C) Moreno Mateos MA et al., 2015	-24.3	0.647001	low	high	high	high	high	high	low	high	high	high
GGGTGTACTGGGGGGACAGT	C) Moreno Mateos MA et al., 2015	-26.3	0.993117	low	high	high	high	high	high	low	high	high	high
GGGTGTAGAGGAGACAGCGG	C) Moreno Mateos MA et al., 2015	-26.7	0.86529	high	high	high	high	high	high	high	high	high	high
GGGTGTCGTCCGGCTGCAGG	C) Moreno Mateos MA et al., 2015	-26.9	0.912488	high	high	high	high	high	high	high	high	high	high
GGGTGTTATACCTGTCCGCG	C) Moreno Mateos MA et al., 2015	-22.7	0.147493	high	high	high	high	high	high	high	high	high	high
GGGTGTTGAATCGTTGGTAC	C) Moreno Mateos MA et al., 2015	-23.7	0.725664	low	high	high	high	high	high	low	high	high	low
GGGTTAATCTCAGGAGTCTC	C) Moreno Mateos MA et al., 2015	-26	0	low	high	high	high	high	high	low	high	high	high
GGGTTCCCGGCCCCAGGCGG	C) Moreno Mateos MA et al., 2015	-26.7	0.430678	low	low	high	high	high	high	high	low	high	low
GGGTTCTAGGGGCCTCCAGC	C) Moreno Mateos MA et al., 2015	-26.7	0.167158	low	low	high	high	high	high	high	high	high	low
GGGTTGTCCGAAATTCCGGG	C) Moreno Mateos MA et al., 2015	-22.8	0.613569	low	high	high	high	high	high	high	high	high	low
GGGTTTCAGGGATGTCCACC	C) Moreno Mateos MA et al., 2015	-24.1	0.596853	high	high	high	high	high	high	high	high	high	high
GGGTTTGAAGATGGTGATGA	C) Moreno Mateos MA et al., 2015	-25.8	0.626352	low	low	high	high	low	high	low	high	high	low
GGGTTTGCTGCCCGCACTGC	C) Moreno Mateos MA et al., 2015	-27	0.300885	high	high	high	high	high	high	high	high	high	high
GGGTTTTGGGTCGGAATGGT	C) Moreno Mateos MA et al., 2015	-27	0.685349	low	high	high	high	high	high	low	high	high	high
GGTAAAGCAGGTTTTTGGAT	C) Moreno Mateos MA et al., 2015	-23.5	0.357915	low	high	high	high	high	high	low	low	high	low
GGTAACACATCATCAGGACG	C) Moreno Mateos MA et al., 2015	-26.5	0.336283	low	low	high	high	low	high	high	high	high	high
GGTAACGTGTTGCAATCGAT	C) Moreno Mateos MA et al., 2015	-26	0.958702	low	high	high	high	high	high	low	high	high	high
GGTAACTGTCGTCCTAGTTC	C) Moreno Mateos MA et al., 2015	-26.8	0.198623	low	low	high	high	high	high	low	high	high	high
GGTAAGAGGCACTGCGGCGG	C) Moreno Mateos MA et al., 2015	-28.6	0.114061	low	high	high	high	high	high	low	high	high	high
GGTAAGTCCTCCTGGAGAGG	C) Moreno Mateos MA et al., 2015	-23.7	0.240905	high	high	high	high	high	high	high	high	high	high
GGTAATCGTGGTGAGAGGCG	C) Moreno Mateos MA et al., 2015	-25.8	0.589971	low	low	high	high	high	low	high	high	high	high
GGTAATTTGAAAGAGTCCAG	C) Moreno Mateos MA et al., 2015	-24.6	0.318584	low	high	high	high	high	high	high	low	high	high
GGTACATCCCTTTCTTTTTG	C) Moreno Mateos MA et al., 2015	-21.6	0.487709	low	high	high	high	high	high	low	low	high	high
GGTACCGGGAGCTGCAGCAG	C) Moreno Mateos MA et al., 2015	-28.3	0.992134	high	high	high	high	high	high	high	high	high	high
GGTACTTGAGAGAGCCAGAC	C) Moreno Mateos MA et al., 2015	-25.7	0.572271	high	high	high	high	high	high	high	high	high	high
GGTAGAAGACCAGGGATATG	C) Moreno Mateos MA et al., 2015	-25.3	0.227139	low	low	high	high	high	high	low	high	high	high
GGTAGATCCCCATCCTGGGC	C) Moreno Mateos MA et al., 2015	-22.4	0.597837	high	high	high	high	high	high	high	high	high	high
GGTAGATTGTGGACTGCTGC	C) Moreno Mateos MA et al., 2015	-33.9	0.153392	low	high	high	high	high	high	high	high	high	low
GGTAGCTATGCCTATCAAGA	C) Moreno Mateos MA et al., 2015	-25.2	0.0786627	low	high	high	high	high	high	low	high	high	high
GGTAGCTGAGGCTTGGCCGT	C) Moreno Mateos MA et al., 2015	-36.2	0.79351	high	high	high	high	high	high	high	high	high	high
GGTAGGACGCAAGGACGCCG	C) Moreno Mateos MA et al., 2015	-28.5	0.961652	high	high	high	high	high	high	high	high	high	high
GGTAGGACTTGGCACAGCAC	C) Moreno Mateos MA et al., 2015	-27.7	0.600787	high	high	high	high	high	high	high	high	high	high
GGTAGGATGGTGGCAGACAC	C) Moreno Mateos MA et al., 2015	-28.2	0.894789	low	low	high	high	low	high	low	high	high	low
GGTAGTGGCTGGGCAGTAGT	C) Moreno Mateos MA et al., 2015	-30.1	0.985251	low	high	high	high	high	high	low	high	high	high
GGTAGTGGTCTGGATTAAAA	C) Moreno Mateos MA et al., 2015	-28.6	0.886922	low	high	high	high	high	high	low	low	high	high
GGTAGTGTGGGCAGGGGGAG	C) Moreno Mateos MA et al., 2015	-27.6	0.389381	high	high	high	high	high	high	high	high	high	high
GGTATCTTCCCTCTTTGCTG	C) Moreno Mateos MA et al., 2015	-22.7	0.162242	low	low	high	high	high	high	low	high	high	high
GGTATGGGCATGCCTCAGAT	C) Moreno Mateos MA et al., 2015	-33.6	0.218289	low	high	high	high	high	high	low	high	high	high
GGTATGGTGGGATGACCAAA	C) Moreno Mateos MA et al., 2015	-25.1	0.898722	low	high	high	high	high	high	low	high	high	high
GGTCAACATTGACTTCATGG	C) Moreno Mateos MA et al., 2015	-24.1	0.124877	low	high	high	high	high	high	low	high	high	high
GGTCAAGTTTTCTTCACTTT	C) Moreno Mateos MA et al., 2015	-25	0.386431	low	high	low	high	high	high	low	low	high	low
GGTCACATGGTACACTCGCA	C) Moreno Mateos MA et al., 2015	-24	0.325467	high	high	high	high	high	high	high	high	high	high
GGTCACCAGCAGGTGGCTGA	C) Moreno Mateos MA et al., 2015	-27.6	0.258604	high	high	high	high	high	high	high	high	high	high
GGTCACCATGCGGGACGAAG	C) Moreno Mateos MA et al., 2015	-23.4	0.0904621	low	high	high	high	high	high	low	high	high	high
GGTCACTCTGGTGGCGGTAA	C) Moreno Mateos MA et al., 2015	-29	0.882006	low	low	high	high	low	high	low	high	high	high
GGTCACTGGGGGTCAAGACG	C) Moreno Mateos MA et al., 2015	-23.4	0.287119	low	high	high	high	high	high	low	high	high	high
GGTCAGACTTTACAGACCTC	C) Moreno Mateos MA et al., 2015	-25.5	0.172075	high	high	high	high	high	high	high	high	high	high
GGTCAGAGCCCTGCAGGCCA	C) Moreno Mateos MA et al., 2015	-24.7	0.344149	high	high	high	high	high	high	high	high	high	high
GGTCAGCTGGGTCACAAAAC	C) Moreno Mateos MA et al., 2015	-22.4	0.223206	low	high	high	high	high	high	low	high	high	high
GGTCAGGGAGGAGGAGGTGC	C) Moreno Mateos MA et al., 2015	-26.5	0.224189	low	high	high	high	high	high	high	high	high	low
GGTCAGTCACCCGAGAGCCA	C) Moreno Mateos MA et al., 2015	-24.6	0.450344	high	high	high	high	high	high	high	high	high	high
GGTCATGAAGATCCCTTCCA	C) Moreno Mateos MA et al., 2015	-22.8	0.534907	low	high	high	high	low	high	low	high	high	high
GGTCATGCAGTCCCGAGACA	C) Moreno Mateos MA et al., 2015	-23.1	0.824975	low	low	high	high	high	high	low	high	high	high
GGTCATGTGCGGTCACAGGG	C) Moreno Mateos MA et al., 2015	-23.1	0.0570305	high	high	high	high	high	high	high	high	high	high
GGTCATGTGTGTGTACTGAT	C) Moreno Mateos MA et al., 2015	-20.8	0.351032	low	high	high	high	low	high	low	high	high	high
GGTCATTAAATAGCGGCTTT	C) Moreno Mateos MA et al., 2015	-29.3	0.243854	low	high	low	high	low	high	low	low	high	high
GGTCCACGGCCATGTGCAGT	C) Moreno Mateos MA et al., 2015	-28.1	0.195674	low	high	high	high	high	high	low	high	high	high
GGTCCACGGCGTAGTGGAGA	C) Moreno Mateos MA et al., 2015	-27.8	0.849558	low	high	high	high	high	high	low	high	high	high
GGTCCAGAAAGATGGAGGAA	C) Moreno Mateos MA et al., 2015	-25.4	0.380531	low	low	high	high	high	high	low	high	high	high
GGTCCAGAAGTCAAGGACAT	C) Moreno Mateos MA et al., 2015	-23	0.26057	low	low	high	high	high	high	low	high	high	high
GGTCCAGTAGCTGCCTTTTC	C) Moreno Mateos MA et al., 2015	-25.8	0.39233	low	high	high	high	high	high	low	high	high	high
GGTCCCATGCTACACATCAT	C) Moreno Mateos MA et al., 2015	-19.9	0.234022	low	high	high	high	high	high	low	high	high	high
GGTCCCGGGCCTCTTCCAGC	C) Moreno Mateos MA et al., 2015	-26.4	0.177974	high	high	high	high	high	high	high	high	high	high
GGTCCTAGAGCTGCCTTGCT	C) Moreno Mateos MA et al., 2015	-27.2	0.268437	low	low	high	high	high	high	low	high	high	high
GGTCGCTCAACAGACCCCAC	C) Moreno Mateos MA et al., 2015	-24.7	0.222222	high	high	high	high	high	high	high	high	high	high
GGTCGGAATTTGACGTGATG	C) Moreno Mateos MA et al., 2015	-24.2	0.113078	low	low	high	high	low	high	low	high	high	high
GGTCGTTACCTACTGCCATG	C) Moreno Mateos MA et al., 2015	-24.8	0.248771	high	high	high	high	high	high	high	high	high	high
GGTCTACATGGTGATGGAGT	C) Moreno Mateos MA et al., 2015	-29.8	0.355949	low	low	high	high	low	high	low	high	high	high
GGTCTACTTGGACCCTGATG	C) Moreno Mateos MA et al., 2015	-24.6	0.45821	low	low	high	high	high	high	low	high	high	high
GGTCTAGAGGAGCAAAAGAT	C) Moreno Mateos MA et al., 2015	-23.8	0.220256	low	low	high	high	high	high	low	high	high	low
GGTCTCCAATGAGTAGAGGT	C) Moreno Mateos MA et al., 2015	-24.4	0.0521141	low	high	high	high	high	high	low	high	high	high
GGTCTCCAGGTGGTGATCGC	C) Moreno Mateos MA et al., 2015	-24.6	0.520157	high	high	high	high	high	high	high	high	high	high
GGTCTCCCCCCAAACGAAGA	C) Moreno Mateos MA et al., 2015	-20.2	0.834808	low	low	high	high	high	high	low	high	high	high
GGTCTGACCGCACACCTGTG	C) Moreno Mateos MA et al., 2015	-27.2	0.310718	low	low	high	high	high	high	high	high	high	low
GGTCTGTAAGTGAAAGAGGA	C) Moreno Mateos MA et al., 2015	-22.2	0.192724	low	high	high	high	high	high	low	high	high	low
GGTCTGTATCTGTGGAAGAG	C) Moreno Mateos MA et al., 2015	-22.1	0.188791	low	low	high	high	high	high	low	high	high	low
GGTCTGTGGTGGGGGTCCCT	C) Moreno Mateos MA et al., 2015	-28.7	0.333333	high	high	high	high	high	high	high	high	high	high
GGTCTGTTTGTGAGCAGCAA	C) Moreno Mateos MA et al., 2015	-22.8	0	low	low	high	high	high	high	low	high	high	low
GGTCTTTGTAGCTGCAAACG	C) Moreno Mateos MA et al., 2015	-23.9	0.171091	low	low	high	high	high	high	low	high	high	low
GGTGAAGTACCTCCATACAT	C) Moreno Mateos MA et al., 2015	-21.1	0.202557	low	high	high	high	high	high	low	high	high	high
GGTGAAGTTGGCGAATAGGA	C) Moreno Mateos MA et al., 2015	-24.8	0.852507	low	high	high	high	high	high	low	high	high	low
GGTGAATCTGATCCAATGAA	C) Moreno Mateos MA et al., 2015	-19.9	0.696165	low	high	high	high	high	high	low	low	high	high
GGTGAATCTTCCAAAGAAAG	C) Moreno Mateos MA et al., 2015	-19.6	0.557522	low	low	high	high	high	high	low	low	high	low
GGTGAATGCCCCGGTGGCAG	C) Moreno Mateos MA et al., 2015	-26.1	0.174041	high	high	high	high	high	high	high	high	high	high
GGTGACACAGTTACTCCTTT	C) Moreno Mateos MA et al., 2015	-26.8	0.340216	low	high	low	high	low	high	low	high	high	high
GGTGACATTACGACAGCGTT	C) Moreno Mateos MA et al., 2015	-33.6	0.625369	low	high	high	high	low	high	low	high	high	high
GGTGACCTAGCAATTGGAGA	C) Moreno Mateos MA et al., 2015	-26.4	0.0373648	low	high	high	high	high	high	low	high	high	high
GGTGACCTCCTCTCAGTCCT	C) Moreno Mateos MA et al., 2015	-28.9	0.647984	low	high	high	high	high	high	low	high	high	high
GGTGACGAGGATGCTGAGGA	C) Moreno Mateos MA et al., 2015	-28.5	0.835792	low	high	high	high	high	high	low	high	high	high
GGTGACGCCGTAGCGAGTGT	C) Moreno Mateos MA et al., 2015	-32	0.119961	low	high	high	high	high	high	low	high	high	high
GGTGAGCAGAGCATTGTCAT	C) Moreno Mateos MA et al., 2015	-25.6	0.723697	low	high	high	high	high	high	low	high	high	high
GGTGAGCGCATGAGGCTGAG	C) Moreno Mateos MA et al., 2015	-27.7	0.959685	high	high	high	high	high	high	high	high	high	high
GGTGAGCTACTGCAGTCCAT	C) Moreno Mateos MA et al., 2015	-27	0.501475	low	high	high	high	high	high	low	high	high	high
GGTGAGCTGCTCCCTCTGGA	C) Moreno Mateos MA et al., 2015	-25.2	0.106195	low	low	high	high	high	high	low	high	high	low
GGTGAGGAGTTCTCATAGGG	C) Moreno Mateos MA et al., 2015	-23.5	0.753196	low	high	high	high	high	high	low	high	high	high
GGTGAGGGGACTCAGCTGGA	C) Moreno Mateos MA et al., 2015	-34.4	0.741396	high	high	high	high	high	high	high	high	high	high
GGTGAGGTAGAGAAACGTTA	C) Moreno Mateos MA et al., 2015	-24.3	0.0639135	low	low	high	high	low	high	low	high	high	low
GGTGAGGTCAGCATTGGAAT	C) Moreno Mateos MA et al., 2015	-25.8	0.00393314	low	high	high	high	high	high	low	high	high	high
GGTGAGGTCCTGTTCTCCAT	C) Moreno Mateos MA et al., 2015	-26.2	0.53294	low	high	high	high	high	high	low	high	high	high
GGTGAGTAGGGACTGATTAG	C) Moreno Mateos MA et al., 2015	-30.6	0.648968	low	high	high	high	high	high	low	high	high	high
GGTGATAAAAACAAATCTAA	C) Moreno Mateos MA et al., 2015	-22.4	0.00294985	low	high	high	high	high	high	low	low	high	high
GGTGATCCCGCAGTTCCAGA	C) Moreno Mateos MA et al., 2015	-22.1	0.00983284	low	high	high	high	high	high	low	high	high	high
GGTGATGAAGAAGAACCATC	C) Moreno Mateos MA et al., 2015	-24.3	0.574238	low	high	high	high	high	high	low	high	high	high
GGTGATGATGGTGAGCTGTG	C) Moreno Mateos MA et al., 2015	-34.2	0.955752	high	high	high	high	high	high	high	high	high	high
GGTGATGGCGCTTTCTGATT	C) Moreno Mateos MA et al., 2015	-31.6	0.558505	low	high	high	high	low	high	low	high	high	high
GGTGATGGGGTATACTTGGA	C) Moreno Mateos MA et al., 2015	-32	0.66765	low	high	high	high	low	high	low	high	high	high
GGTGATGTAGGAGAGTAGGA	C) Moreno Mateos MA et al., 2015	-27.2	0.509341	low	high	high	high	high	high	low	high	high	high
GGTGATGTCCTGAATGACTT	C) Moreno Mateos MA et al., 2015	-29.4	0.570305	low	high	high	high	low	high	low	high	high	high
GGTGCAATAAATTACTTTTA	C) Moreno Mateos MA et al., 2015	-20.9	0.411996	low	low	high	high	high	high	low	low	high	low
GGTGCACCAGCGGGATTTGA	C) Moreno Mateos MA et al., 2015	-24.2	0.100295	low	low	high	high	low	high	low	high	high	high
GGTGCAGAGGGTCATTCCGT	C) Moreno Mateos MA et al., 2015	-25.7	0.477876	low	high	high	high	high	high	low	high	high	high
GGTGCAGGAGGTTCTTGGGA	C) Moreno Mateos MA et al., 2015	-23.5	0.617502	low	high	high	high	high	high	low	high	high	high
GGTGCCACCCCTTTTCCCAT	C) Moreno Mateos MA et al., 2015	-25.8	0.314651	low	high	high	high	high	high	low	high	high	low
GGTGCCACGACTCCTTTTGG	C) Moreno Mateos MA et al., 2015	-26	0.484759	low	high	high	high	high	high	low	high	high	low
GGTGCCGCTCTCGAACACTA	C) Moreno Mateos MA et al., 2015	-27.7	0.0589971	low	low	high	high	low	high	low	high	high	low
GGTGCGCGGGAGAGAAAGTG	C) Moreno Mateos MA et al., 2015	-26.8	0.722714	low	high	high	high	high	low	low	high	high	high
GGTGCGGACGATCTGTGCCT	C) Moreno Mateos MA et al., 2015	-34	0.610619	high	high	high	high	high	high	high	high	high	high
GGTGCGGGCGTAGGCGAGGG	C) Moreno Mateos MA et al., 2015	-32.4	0.949853	high	high	high	high	high	high	high	high	high	high
GGTGCGTTTGGACCAGGGGC	C) Moreno Mateos MA et al., 2015	-25.8	0.417896	high	high	high	high	high	high	high	high	high	high
GGTGCTCAGGTAAGGAACAA	C) Moreno Mateos MA et al., 2015	-24.6	0.459194	low	low	high	high	high	high	low	high	high	high
GGTGCTGAAGGGCGTGAGAT	C) Moreno Mateos MA et al., 2015	-26.4	0.457227	low	high	high	high	high	high	low	high	high	high
GGTGCTGACTGTGAGGGTGC	C) Moreno Mateos MA et al., 2015	-25.3	0.424779	low	high	high	high	high	high	high	high	high	low
GGTGCTGATGATGGAGGCTG	C) Moreno Mateos MA et al., 2015	-35.3	0.409046	high	high	high	high	high	high	high	high	high	high
GGTGCTGCAATCTCTGTGAC	C) Moreno Mateos MA et al., 2015	-22.7	0.278269	low	low	high	high	high	high	low	high	high	low
GGTGCTGCCGGAGAACATCC	C) Moreno Mateos MA et al., 2015	-27.3	0.998033	low	high	high	high	high	high	low	high	high	high
GGTGCTGCTGCATGCCACTA	C) Moreno Mateos MA et al., 2015	-26.6	0.536873	low	low	high	high	high	high	low	high	high	high
GGTGCTGCTGGTATTAGTGA	C) Moreno Mateos MA et al., 2015	-26.6	0.40118	low	high	high	high	high	high	low	high	high	high
GGTGCTGGGCTCCAGAGATT	C) Moreno Mateos MA et al., 2015	-29.7	0.517207	low	high	high	high	high	high	low	high	high	high
GGTGCTGGTGTTATCAGGCA	C) Moreno Mateos MA et al., 2015	-26.1	0.504425	low	low	high	high	high	low	high	high	high	high
GGTGCTGTAGTCGCCCTTAA	C) Moreno Mateos MA et al., 2015	-23.1	0.427729	low	high	high	high	high	high	low	high	high	high
GGTGCTGTTTATGAAAGCGG	C) Moreno Mateos MA et al., 2015	-23.6	0.405113	high	high	high	high	high	high	high	high	high	high
GGTGCTTCTGTGTGGGGGTG	C) Moreno Mateos MA et al., 2015	-24.9	0.935103	low	low	high	high	high	low	high	high	high	high
GGTGCTTGAATGTGCTTTGG	C) Moreno Mateos MA et al., 2015	-24.7	0.410029	low	high	high	high	high	high	low	high	high	high
GGTGCTTGACTTCCTGTTGC	C) Moreno Mateos MA et al., 2015	-24.2	0.645034	low	high	high	high	high	high	low	high	high	high
GGTGCTTTGCGGGTCTGGGG	C) Moreno Mateos MA et al., 2015	-29.7	0.826942	high	high	high	high	high	high	high	high	high	high
GGTGGAAGGATGCGTTACCG	C) Moreno Mateos MA et al., 2015	-26.4	0.989184	low	high	high	high	high	high	low	high	high	high
GGTGGAGACGCCTTTCCGTG	C) Moreno Mateos MA et al., 2015	-27	0.939036	high	high	high	high	high	high	high	high	high	high
GGTGGAGCTGGAGTACTCTC	C) Moreno Mateos MA et al., 2015	-28	0.516224	low	high	high	high	high	high	low	high	high	high
GGTGGAGGAAAAGGCCAGAG	C) Moreno Mateos MA et al., 2015	-30.9	0.846608	high	high	high	high	high	high	high	high	high	high
GGTGGAGGAGAAGGTGAAAG	C) Moreno Mateos MA et al., 2015	-28.2	0.797443	low	high	high	high	high	high	low	high	high	high
GGTGGAGGAGCCCGAACATT	C) Moreno Mateos MA et al., 2015	-29.2	0.79941	low	high	high	high	high	high	low	high	high	high
GGTGGAGGAGGAGAGCAGTA	C) Moreno Mateos MA et al., 2015	-29.3	0.259587	low	high	high	high	high	low	low	high	high	high
GGTGGAGGATAACTGTGAGT	C) Moreno Mateos MA et al., 2015	-27.5	0.622419	low	high	high	high	high	high	low	high	high	high
GGTGGAGGTGGTGGAGTCGG	C) Moreno Mateos MA et al., 2015	-28.1	0.962635	high	high	high	high	high	high	high	high	high	high
GGTGGAGTCGGCTCGAGTGG	C) Moreno Mateos MA et al., 2015	-25	0.794494	high	high	high	high	high	high	high	high	high	high
GGTGGATATCGAAGGAGCTT	C) Moreno Mateos MA et al., 2015	-28.7	0.46116	low	high	high	high	high	high	low	high	high	low
GGTGGATGGGACAGGGAAGC	C) Moreno Mateos MA et al., 2015	-26.2	0.634218	high	high	high	high	high	high	high	high	high	high
GGTGGCAAGGTGACTGTATA	C) Moreno Mateos MA et al., 2015	-27	0.443461	low	high	high	high	high	high	low	high	high	high
GGTGGCACCAGTGTGCTGAG	C) Moreno Mateos MA et al., 2015	-25.6	0.87414	high	high	high	high	high	high	high	high	high	high
GGTGGCAGAAACTGGAGTGG	C) Moreno Mateos MA et al., 2015	-27.5	0.80236	high	high	high	high	high	high	high	high	high	high
GGTGGCCGCCATCGCACTGC	C) Moreno Mateos MA et al., 2015	-25.6	0.0698132	low	high	high	high	high	high	high	high	low	high
GGTGGCCTTCACCTGGGTCA	C) Moreno Mateos MA et al., 2015	-25.8	0.304818	high	high	high	high	high	high	high	high	high	high
GGTGGCGCAGCTCAAGCAGA	C) Moreno Mateos MA et al., 2015	-29.6	0.0757129	low	high	high	high	high	high	low	high	high	high
GGTGGCGGGTGGGCAGAGGG	C) Moreno Mateos MA et al., 2015	-32	0.978368	high	high	high	high	high	high	high	high	high	high
GGTGGCGTCGAAGTGTGCGC	C) Moreno Mateos MA et al., 2015	-25.9	0.00688299	high	high	high	high	high	high	high	high	high	high
GGTGGCTGTGATGGGGCTTT	C) Moreno Mateos MA et al., 2015	-35.2	0.875123	low	high	low	high	low	high	low	high	high	high
GGTGGGACTGAAAGAGGTGG	C) Moreno Mateos MA et al., 2015	-26.3	0.996067	high	high	high	high	high	high	high	high	high	high
GGTGGGAGTGGGATTGGCTT	C) Moreno Mateos MA et al., 2015	-34	0.363815	low	high	high	high	high	high	low	high	high	high
GGTGGGATTGACATCTTGAA	C) Moreno Mateos MA et al., 2015	-24.8	0.525074	low	high	high	high	high	high	low	high	high	high
GGTGGGCAACAACCAGGTTT	C) Moreno Mateos MA et al., 2015	-26.7	0.657817	low	high	high	high	high	high	low	high	high	high
GGTGGGCATTGTGGTTATAT	C) Moreno Mateos MA et al., 2015	-25.3	0.921337	low	high	high	high	high	high	low	high	high	high
GGTGGGCCTCCCAGAGTCAG	C) Moreno Mateos MA et al., 2015	-25.2	0.915438	low	high	high	high	high	high	low	high	low	high
GGTGGGCGTCTTTCTGAGCC	C) Moreno Mateos MA et al., 2015	-26.2	0.706981	low	high	high	low	high	high	high	high	high	high
GGTGGGGAAGTCGAGCGGCA	C) Moreno Mateos MA et al., 2015	-26.7	0.690265	low	high	high	high	high	low	high	high	high	high
GGTGGGGGTGTGCAAGTGCT	C) Moreno Mateos MA et al., 2015	-29.9	0.418879	low	high	high	high	high	high	low	high	high	high
GGTGGGTGTGCTGGGGGCTG	C) Moreno Mateos MA et al., 2015	-30.3	0.679449	low	low	high	high	high	high	high	high	high	low
GGTGGGTTCGAGGTCGTCTT	C) Moreno Mateos MA et al., 2015	-29	0.769912	low	high	low	high	high	high	low	high	high	low
GGTGGGTTTGGATTCTTGAA	C) Moreno Mateos MA et al., 2015	-24.3	0.47296	low	high	high	high	high	high	low	high	high	high
GGTGGTAGTCGAGAGGTGGC	C) Moreno Mateos MA et al., 2015	-27.6	0.668633	high	high	high	high	high	high	high	high	high	high
GGTGGTCGTCGAATTGGCCT	C) Moreno Mateos MA et al., 2015	-31.8	0.53589	high	high	high	high	high	high	high	high	high	high
GGTGGTGACTATTGAAATTT	C) Moreno Mateos MA et al., 2015	-26.8	0.165192	low	high	high	high	low	high	low	low	high	high
GGTGGTGAGCCAAACGGGTA	C) Moreno Mateos MA et al., 2015	-29.2	0.951819	low	low	high	high	low	low	high	high	high	high
GGTGGTGAGGACACATATGG	C) Moreno Mateos MA et al., 2015	-27.6	0.454277	low	high	high	high	high	high	low	high	high	high
GGTGGTGCCTGATGTTCGCT	C) Moreno Mateos MA et al., 2015	-25.1	0.813176	low	high	high	high	high	high	low	high	high	high
GGTGGTGCTATCATGCTGTG	C) Moreno Mateos MA et al., 2015	-24.6	0.0353982	high	high	high	high	high	high	high	high	high	high
GGTGGTGCTATGCTGTGTTG	C) Moreno Mateos MA et al., 2015	-25.1	0.684366	low	high	high	high	high	high	low	high	high	high
GGTGGTGGCGGAGTCCTCCC	C) Moreno Mateos MA et al., 2015	-33.7	0.893805	high	high	high	high	high	high	high	high	high	high
GGTGGTGGGGGGAGTGATCG	C) Moreno Mateos MA et al., 2015	-27.9	0.349066	low	high	high	high	high	high	low	high	high	high
GGTGGTGTTGTACGGTGCGA	C) Moreno Mateos MA et al., 2015	-26	0.731563	low	low	high	high	low	high	high	high	high	low
GGTGGTTGGGGCGGCTCTCA	C) Moreno Mateos MA et al., 2015	-28.6	0.551622	low	high	high	high	high	high	low	high	high	high
GGTGTAGCTGAAGCTCTGGG	C) Moreno Mateos MA et al., 2015	-26.7	0.265487	low	low	high	high	high	high	high	high	high	high
GGTGTAGGCTGTACCTTTGT	C) Moreno Mateos MA et al., 2015	-26.7	0.102262	low	high	high	high	high	high	low	high	high	high
GGTGTAGTAGTCGACGCCGC	C) Moreno Mateos MA et al., 2015	-25.8	0.00884956	low	high	high	high	high	high	low	high	high	high
GGTGTATAACGCGCAGGTGT	C) Moreno Mateos MA et al., 2015	-28.3	0.732547	low	high	high	high	high	high	low	high	high	high
GGTGTCAGCGAATGGCTTTC	C) Moreno Mateos MA et al., 2015	-29.1	0.0108161	low	high	high	high	low	high	low	high	high	high
GGTGTCCCGCTGGGGTTCGG	C) Moreno Mateos MA et al., 2015	-24.2	0.32645	low	low	high	high	high	high	high	high	high	low
GGTGTCCTCGGAGAGCAAAG	C) Moreno Mateos MA et al., 2015	-27.7	0.627335	low	high	high	high	high	high	low	high	high	high
GGTGTCGACAGCCGAGGAGC	C) Moreno Mateos MA et al., 2015	-26.5	0.282203	high	high	high	high	high	high	high	high	high	high
GGTGTCTATGGCGGACCGAG	C) Moreno Mateos MA et al., 2015	-29.5	0.889872	low	low	high	high	low	high	high	high	high	low
GGTGTCTGTAAACCTGCTGG	C) Moreno Mateos MA et al., 2015	-24.9	0.0894789	high	high	high	high	high	high	high	high	high	high
GGTGTGGAACGTCCGTGTTA	C) Moreno Mateos MA et al., 2015	-23.8	0.205506	low	low	high	high	high	high	low	high	high	high
GGTGTGGGTGGTTGAGGTAT	C) Moreno Mateos MA et al., 2015	-23.6	0.674533	low	high	high	high	high	high	low	high	high	high
GGTGTGTACAACAAATGTTC	C) Moreno Mateos MA et al., 2015	-20.5	0.110128	low	low	high	high	high	high	low	low	high	low
GGTGTGTCGGACACCCCGGG	C) Moreno Mateos MA et al., 2015	-29.7	0.864307	low	high	high	high	high	high	low	high	high	high
GGTGTTAGATACAGAGAGCA	C) Moreno Mateos MA et al., 2015	-23.7	0.490659	low	high	high	high	high	low	low	high	high	high
GGTGTTCACCGTGGCTATGA	C) Moreno Mateos MA et al., 2015	-23.6	0.615536	low	high	high	high	high	high	low	high	high	high
GGTGTTGAATATGGAGCATG	C) Moreno Mateos MA et al., 2015	-29.5	0.870206	low	high	high	high	high	high	low	high	high	low
GGTGTTGCGGGACGAGAAGA	C) Moreno Mateos MA et al., 2015	-26.7	0.0737463	low	high	high	high	high	high	low	high	high	high
GGTGTTGCTGCACATATGCG	C) Moreno Mateos MA et al., 2015	-23.3	0.151426	low	low	high	high	high	high	low	high	high	low
GGTGTTGGGGAGGGGGTCAC	C) Moreno Mateos MA et al., 2015	-28.5	0.327434	low	high	high	high	high	high	high	high	high	low
GGTGTTGGTGGTTGCATGCG	C) Moreno Mateos MA et al., 2015	-25.3	0.421829	high	high	high	high	high	high	high	high	high	high
GGTGTTTTGATGCAAGGGAA	C) Moreno Mateos MA et al., 2015	-23.4	0.201573	low	low	high	high	high	high	low	high	high	high
GGTTAAATATTAAAGTGTCT	C) Moreno Mateos MA et al., 2015	-21.7	0.107178	low	high	high	high	high	high	low	low	high	high
GGTTAAATCAGTGTTCATGC	C) Moreno Mateos MA et al., 2015	-19.3	0.0707965	low	low	high	high	high	high	low	low	high	low
GGTTAAGTGGGGTCTGGGTC	C) Moreno Mateos MA et al., 2015	-27.1	0.294002	low	high	high	high	high	high	high	high	high	low
GGTTACTGCTGTTGCTGTAC	C) Moreno Mateos MA et al., 2015	-23.5	0.27237	low	high	high	high	high	high	low	high	high	high
GGTTACTGTGGTGACTGTGG	C) Moreno Mateos MA et al., 2015	-23.7	0.918387	low	low	high	high	low	high	high	high	high	high
GGTTAGAAGAGGAGAACAAC	C) Moreno Mateos MA et al., 2015	-21.3	0.950836	low	high	high	high	high	high	low	high	high	low
GGTTATATCACTCTTCATTT	C) Moreno Mateos MA et al., 2015	-21.6	0.208456	low	high	high	high	high	high	low	low	high	low
GGTTATGATAAACCTGGTCA	C) Moreno Mateos MA et al., 2015	-28.4	0.513274	low	high	high	high	high	high	low	low	high	high
GGTTCACATCCGAGCCAGAG	C) Moreno Mateos MA et al., 2015	-24.4	0.193707	high	high	high	high	high	high	high	high	high	high
GGTTCAGCAGGGCGCGGTGT	C) Moreno Mateos MA et al., 2015	-28.1	0.399213	high	high	high	high	high	high	high	high	high	high
GGTTCAGGATACCCATGGCT	C) Moreno Mateos MA et al., 2015	-27.6	0.289086	low	high	high	high	high	high	low	high	high	high
GGTTCCACTGAGCAGGATGT	C) Moreno Mateos MA et al., 2015	-25.5	0.0993117	low	low	high	high	high	high	low	high	high	high
GGTTCCAGAGAGGTTGCTTC	C) Moreno Mateos MA et al., 2015	-24.7	0.148476	low	high	high	high	high	high	low	high	high	high
GGTTCCGGATGAAGATGCAA	C) Moreno Mateos MA et al., 2015	-27.1	0.80826	low	high	high	high	high	high	low	high	high	high
GGTTCTGAGAGGACAGGTCA	C) Moreno Mateos MA et al., 2015	-29.1	0.0265487	low	high	high	high	high	high	low	high	high	high
GGTTCTGGAGTTGACGGATC	C) Moreno Mateos MA et al., 2015	-28.6	0.630285	low	low	high	high	high	high	high	high	high	low
GGTTCTGTTCAGCTTGATGG	C) Moreno Mateos MA et al., 2015	-23.5	0.455261	low	low	high	high	high	high	low	high	high	low
GGTTCTTGAGGAGGCTAGAC	C) Moreno Mateos MA et al., 2015	-28.8	0.256637	low	high	high	high	high	high	low	high	high	low
GGTTCTTGGGCATTGGAGGA	C) Moreno Mateos MA et al., 2015	-24.7	0.108161	high	high	high	high	high	high	high	high	high	high
GGTTGAACAACAACAGGAGC	C) Moreno Mateos MA et al., 2015	-23.5	0.705998	low	high	high	high	high	high	high	high	high	low
GGTTGAACTGCAATTGCATG	C) Moreno Mateos MA et al., 2015	-23.9	0.0491642	low	high	high	high	high	high	low	high	high	low
GGTTGAAGTGGAGAAACTGA	C) Moreno Mateos MA et al., 2015	-27.9	0.980334	low	high	high	high	high	high	low	high	high	low
GGTTGAGGCATGCCTTGCAA	C) Moreno Mateos MA et al., 2015	-29	0.385447	low	high	high	high	high	high	low	high	high	low
GGTTGATTGGTGGTAGCACT	C) Moreno Mateos MA et al., 2015	-32.7	0.776794	low	high	high	high	high	high	low	high	high	low
GGTTGCGATTGGGTACAAAT	C) Moreno Mateos MA et al., 2015	-25.1	0.812193	low	high	high	high	high	high	low	high	high	high
GGTTGCTTACAAAAGTGTTG	C) Moreno Mateos MA et al., 2015	-23.2	0.317601	low	low	high	high	low	high	low	low	high	high
GGTTGGCAACACGGATTTGA	C) Moreno Mateos MA et al., 2015	-28	0.0609636	low	low	high	high	low	high	low	high	high	low
GGTTGGTGAGTTCATCCAAT	C) Moreno Mateos MA et al., 2015	-25.7	0.72763	low	high	high	high	high	high	low	high	high	low
GGTTGGTGGTTATGTTGGGA	C) Moreno Mateos MA et al., 2015	-24	0.80531	low	low	high	high	low	high	low	high	high	low
GGTTGTACATGTCCAGGTTG	C) Moreno Mateos MA et al., 2015	-24.1	0.284169	low	low	high	high	high	high	low	high	high	low
GGTTTATCCAGTTCTTCCTG	C) Moreno Mateos MA et al., 2015	-22.7	0.316618	low	high	high	high	high	high	low	high	high	high
GGTTTCAATGACGGGTAAGA	C) Moreno Mateos MA et al., 2015	-26	0.496559	low	low	high	high	low	high	low	high	high	high
GGTTTGACCTCAACAAGACG	C) Moreno Mateos MA et al., 2015	-22.3	0.271386	low	low	high	high	high	high	low	high	high	low
GGTTTGGAGGGACTGTCTTG	C) Moreno Mateos MA et al., 2015	-33	0.471976	low	low	high	high	high	high	low	high	high	high
GGTTTGGGAGACCATGTCGT	C) Moreno Mateos MA et al., 2015	-26.9	0.867257	low	high	high	high	high	high	low	high	high	high
GGTTTGGTGGCACCGCTTGT	C) Moreno Mateos MA et al., 2015	-27.5	0.294985	low	high	high	high	low	high	low	high	high	high
GGTTTGGTGGTCGGACCCAA	C) Moreno Mateos MA et al., 2015	-31.7	0.876106	low	high	high	high	high	high	low	high	high	high
GGTTTTGTCTGAGGATGGGC	C) Moreno Mateos MA et al., 2015	-26.6	0.315634	high	high	high	high	high	high	high	high	high	high
GGAAGAGTTGGTGGTCGGCT	D) Gagnon JA et al., 2014	-31	0.336842	low	low	high	high	low	high	high	high	high	low
GGAAGGCAAACCTTTTCACC	D) Gagnon JA et al., 2014	-21.6	0.00842105	low	high	high	high	high	high	low	high	low	high
GGAAGGCGCGGCGGTGCCCG	D) Gagnon JA et al., 2014	-31.3	0.683158	low	high	high	high	high	high	high	low	high	high
GGACACCCTTCATGGCCGAT	D) Gagnon JA et al., 2014	-30.5	0	high	high	high	high	high	high	high	high	high	high
GGACAGCCGACTGAGCGAGC	D) Gagnon JA et al., 2014	-29	0.250526	high	high	high	high	high	high	high	high	high	high
GGACCAGACGAACCTGTTCG	D) Gagnon JA et al., 2014	-24.8	0.108421	low	high	high	high	high	high	low	high	high	high
GGACCGGTCAGCCATTGACA	D) Gagnon JA et al., 2014	-26.2	0.0578947	low	high	high	high	high	high	low	high	high	high
GGACGACCGTCTCTCTCACC	D) Gagnon JA et al., 2014	-23.9	0.0147368	high	high	high	high	high	high	high	high	high	high
GGACGGTGTGGCAGCATTTG	D) Gagnon JA et al., 2014	-28.1	0.544211	low	high	high	high	high	high	low	high	high	high
GGACGTCCATCCGCAACATT	D) Gagnon JA et al., 2014	-25.1	0.00315789	low	high	high	high	high	high	low	high	high	high
GGACTCAGGCTCGGTCATCC	D) Gagnon JA et al., 2014	-27.6	0.925263	low	high	high	high	high	high	low	high	high	high
GGACTCGTTCGCTCTCGCTC	D) Gagnon JA et al., 2014	-26.3	0.116842	low	low	high	high	high	high	high	high	high	high
GGACTCTGCGGTGAACCGCT	D) Gagnon JA et al., 2014	-29.6	0	high	high	high	high	high	high	high	high	high	high
GGAGACCACGAGTACATGAC	D) Gagnon JA et al., 2014	-22.5	0.0168421	low	low	high	high	high	high	low	high	high	low
GGAGATGGTCTGGGCGAAGC	D) Gagnon JA et al., 2014	-30.4	0	high	high	high	high	high	high	high	high	high	high
GGAGCGGGGCATGTGGATAT	D) Gagnon JA et al., 2014	-25.6	0.514737	low	high	high	high	high	high	low	high	high	high
GGAGGATGGTGTGGATCCTG	D) Gagnon JA et al., 2014	-29.6	0.0452632	low	high	high	high	high	high	low	high	high	high
GGAGGGAAAGGAGAGAAGGT	D) Gagnon JA et al., 2014	-23.6	0.454737	low	high	high	high	high	high	low	high	high	high
GGAGTCCATATTGGCCCTTC	D) Gagnon JA et al., 2014	-26.1	0.0652632	high	high	high	high	high	high	high	high	high	high
GGAGTCCTTTGACCTGGCTC	D) Gagnon JA et al., 2014	-28.8	0.0957895	low	low	high	high	high	high	high	high	high	low
GGAGTGCAAATTTAAAGAGT	D) Gagnon JA et al., 2014	-23	0	low	high	high	high	high	high	low	low	high	high
GGATCATATTCAAGGGATCA	D) Gagnon JA et al., 2014	-24.9	0.411579	low	low	high	high	high	high	low	low	high	low
GGATGAACTCAAAAAAGAAG	D) Gagnon JA et al., 2014	-20	0.00105263	low	high	high	high	high	high	low	low	high	high
GGATGATGATGATTTCTGTG	D) Gagnon JA et al., 2014	-26.3	0	low	high	high	high	high	high	low	low	high	high
GGATGGACCCTGAACAGTGC	D) Gagnon JA et al., 2014	-25.2	0.142105	low	low	high	high	high	high	high	high	high	high
GGATGTTGAGGAGGGATCAG	D) Gagnon JA et al., 2014	-28.9	0.22	low	high	high	high	high	high	low	high	high	low
GGATGTTGTCACTCGCTGAC	D) Gagnon JA et al., 2014	-26	0.0368421	high	high	high	high	high	high	high	high	high	high
GGATTATTACATCAAGTGCA	D) Gagnon JA et al., 2014	-23	0	low	high	high	high	high	high	low	low	high	high
GGCAGCAGTGGAGGCCATTT	D) Gagnon JA et al., 2014	-28	0.0621053	low	high	high	high	high	high	low	high	high	high
GGCAGCGGAGACCCTGAGGG	D) Gagnon JA et al., 2014	-28.6	0.305263	low	low	high	high	high	high	high	high	high	high
GGCAGCTCCGGGTCCCAACA	D) Gagnon JA et al., 2014	-21.4	0.0873684	low	high	high	high	high	high	low	high	high	high
GGCAGGATGTCAGCCAGAGG	D) Gagnon JA et al., 2014	-27.4	0.631579	high	high	high	high	high	high	high	high	high	high
GGCCCAGGAGGAGCCCACAC	D) Gagnon JA et al., 2014	-27.1	1	high	high	high	high	high	high	high	high	high	high
GGCCCTCATGACACTACTGA	D) Gagnon JA et al., 2014	-24.6	0	low	high	high	high	high	high	low	high	high	high
GGCCGAGCTGAACTTTGAGG	D) Gagnon JA et al., 2014	-22.7	0.526316	low	high	high	high	high	high	low	high	high	high
GGCGCAGTTTGTCCAGCTGG	D) Gagnon JA et al., 2014	-24.8	0.685263	high	high	high	high	high	high	high	high	high	high
GGCTCAGACAGCCTGCCATT	D) Gagnon JA et al., 2014	-29.7	0.165263	low	high	high	high	high	high	low	high	high	high
GGCTCAGACCGCATGTATCC	D) Gagnon JA et al., 2014	-23.3	0.131579	low	low	high	high	high	high	low	high	high	low
GGCTCCTGCCAAACTGATGA	D) Gagnon JA et al., 2014	-26.7	0.115789	low	low	high	high	low	high	low	high	high	high
GGCTCTGTCCACCGAGCGCT	D) Gagnon JA et al., 2014	-25.8	0.130526	low	low	high	high	high	high	high	high	high	low
GGCTGTTCCCGAGGAAGCTC	D) Gagnon JA et al., 2014	-25.7	0.174737	low	low	high	high	high	high	low	high	high	low
GGCTTACGATGAACCTTGTG	D) Gagnon JA et al., 2014	-25.1	0.124211	low	low	high	high	high	high	low	high	high	low
GGCTTCCAGCCTTGTGCAGA	D) Gagnon JA et al., 2014	-27.1	0	low	low	high	high	high	high	low	high	high	high
GGCTTTGCCCAAATTTAAGA	D) Gagnon JA et al., 2014	-22.1	0.0315789	low	high	high	high	high	high	low	low	high	high
GGGAAAAGCGAGAGAAACCG	D) Gagnon JA et al., 2014	-24.5	0.427368	low	high	high	high	high	high	low	high	high	high
GGGAAGAAGAAGGTCAGTAG	D) Gagnon JA et al., 2014	-23.1	0.0210526	low	high	high	high	high	high	low	high	high	high
GGGAAGAGGGAGCACGGGCT	D) Gagnon JA et al., 2014	-28.7	0.203158	low	low	high	high	low	high	high	high	high	high
GGGAAGGTATATAAAATCCT	D) Gagnon JA et al., 2014	-21.7	0.231579	low	high	high	high	high	high	low	low	high	high
GGGAAGTTTGTCCAGAGCAG	D) Gagnon JA et al., 2014	-23	0.8	high	high	high	high	high	high	high	high	high	high
GGGAGCGCGCGCGCAGCAGG	D) Gagnon JA et al., 2014	-27.6	0	low	high	high	high	high	high	high	low	high	high
GGGAGTCTTACCCTACGGCG	D) Gagnon JA et al., 2014	-24.8	0	low	low	high	high	low	low	high	high	high	high
GGGATCCCGCACACTGGTTC	D) Gagnon JA et al., 2014	-26.6	0.0978947	low	high	high	high	high	high	low	high	high	high
GGGCAAACGGCTCAATGACA	D) Gagnon JA et al., 2014	-24.9	0.0515789	low	low	high	high	high	high	low	high	high	high
GGGCATCCAGCAGCTGGGTT	D) Gagnon JA et al., 2014	-27.7	0.113684	low	high	high	high	high	high	low	high	low	high
GGGCCAATGACAAACTCAAA	D) Gagnon JA et al., 2014	-21.3	0.0231579	low	high	high	high	high	high	low	high	high	high
GGGCCGTACAACCTATGAAC	D) Gagnon JA et al., 2014	-21.2	0.0989474	low	low	high	high	high	high	low	high	high	high
GGGCGAGACACTGTACATCG	D) Gagnon JA et al., 2014	-24.1	0.270526	low	low	high	high	high	high	low	high	high	low
GGGGCGGCACTTCAGGGCAG	D) Gagnon JA et al., 2014	-28	0.514737	high	high	high	high	high	high	high	high	high	high
GGGGTGCCTTCTCCGTGGTG	D) Gagnon JA et al., 2014	-26.5	0.461053	low	high	high	high	high	low	high	high	high	high
GGGTAATCTGAATGCTTCTT	D) Gagnon JA et al., 2014	-26.9	0.641053	low	high	low	high	low	high	low	low	high	high
GGGTCAGAATGTGTGAAAGT	D) Gagnon JA et al., 2014	-19.7	0.00315789	low	high	high	high	high	high	low	high	high	high
GGGTTGTGATCAAAATGATC	D) Gagnon JA et al., 2014	-22.5	0	low	high	high	high	high	high	low	low	low	low
GGGTTTCCAGGGTCTGCTGG	D) Gagnon JA et al., 2014	-27.8	0.494737	high	high	high	high	high	high	high	high	high	high
GGTCAAAACTCAGACAGGTC	D) Gagnon JA et al., 2014	-23.7	0.273684	high	high	high	high	high	high	high	high	high	high
GGTCAATCTGAGTGATTATC	D) Gagnon JA et al., 2014	-21.8	0.0231579	low	high	high	high	high	high	low	low	high	low
GGTCCCGTGTGCTGCTACTG	D) Gagnon JA et al., 2014	-24.4	0.782105	low	high	high	high	high	high	low	high	high	high
GGTCCTGCTCGTTGGATTTC	D) Gagnon JA et al., 2014	-22.2	0	low	low	high	high	high	high	low	high	high	low
GGTCTCACGTCTCCAGCCCT	D) Gagnon JA et al., 2014	-28.1	0.172632	high	high	high	high	high	high	high	high	high	high
GGTCTGTGGACTCGAAACAC	D) Gagnon JA et al., 2014	-24.4	0.52	low	high	high	high	high	high	low	high	high	high
GGTGAGAATTCTCCAGCAGC	D) Gagnon JA et al., 2014	-23.9	0	high	high	high	high	high	high	high	high	high	high
GGTGCACAATGAAAACTGCC	D) Gagnon JA et al., 2014	-24.2	0.0252632	high	high	high	high	high	high	high	high	high	high
GGTGGACAAATACACACGCC	D) Gagnon JA et al., 2014	-24.7	0.416842	high	high	high	high	high	high	high	high	high	high
GGTGGGAGTGTCGGGACGCT	D) Gagnon JA et al., 2014	-25.7	0.0789474	low	high	high	high	high	high	high	high	high	low
GGTGGTCTGTGTATGAGTCC	D) Gagnon JA et al., 2014	-22.2	0.341053	high	high	high	high	high	high	high	high	high	high
GGTGTATTTCAAATTGAACA	D) Gagnon JA et al., 2014	-21.3	0.0136842	low	low	high	high	high	high	low	low	high	low
GGTTCCAAAAACGTTGTCAA	D) Gagnon JA et al., 2014	-23	0.00631579	low	low	high	high	high	high	low	low	high	low
GGTTGAAGACTTTGAGAACA	D) Gagnon JA et al., 2014	-24	0.0978947	low	high	high	high	high	high	low	low	high	low
GGTTTTACCCGCTAACCCAG	D) Gagnon JA et al., 2014	-23.3	0.148421	high	high	high	high	high	high	high	high	high	high
GAACATTGGGAGGGTAGCGG	E) Gandhi S et al., 2016	-27.7	0.355932	low	high	high	high	high	high	high	high	high	low
GAACCAGATCTTGACCTGGG	E) Gandhi S et al., 2016	-22.9	0.627119	high	high	high	high	high	high	high	high	high	high
GAACTCCTGAGTTCTTGAGA	E) Gandhi S et al., 2016	-21.7	0.983051	low	low	high	high	high	high	low	high	high	low
GAAGCAAAGGGGGACTCCCT	E) Gandhi S et al., 2016	-29.4	0.59322	high	high	high	high	high	high	high	high	high	high
GAATCAGTTACTCAAGTCAC	E) Gandhi S et al., 2016	-21.8	0.779661	low	high	high	high	high	high	low	low	high	high
GAATTGGGGACACATTGTCC	E) Gandhi S et al., 2016	-24.6	0.627119	low	high	high	high	high	high	low	high	high	high
GACACAGAAAGACACTGGGG	E) Gandhi S et al., 2016	-23.2	0.728814	high	high	high	high	high	high	high	high	high	high
GACACCCCGATCTGTATACC	E) Gandhi S et al., 2016	-19.3	0.491525	low	high	high	high	high	high	low	high	high	high
GACAGCCACCTCGCTTATGA	E) Gandhi S et al., 2016	-24.9	0.474576	low	low	high	high	high	high	low	high	high	high
GACCCGACAGCTCCCATACC	E) Gandhi S et al., 2016	-22.2	0.440678	low	high	high	high	high	high	low	high	high	high
GACTCTGCCCATCCCGCCAA	E) Gandhi S et al., 2016	-24.1	0.288136	low	high	high	high	high	high	high	high	high	low
GAGAATGCCTCAGTTAAACT	E) Gandhi S et al., 2016	-22.6	0.508475	low	high	high	high	high	high	low	low	high	high
GAGAGAGGTCCCAATACAAA	E) Gandhi S et al., 2016	-19.8	0.0169492	low	high	high	high	high	high	low	high	high	high
GAGTCTTTATTCCGTAGCTC	E) Gandhi S et al., 2016	-25.9	0.322034	low	low	high	high	high	high	low	high	high	low
GATATCTCGCCCACAAATGG	E) Gandhi S et al., 2016	-24.1	0.152542	low	low	high	high	high	high	low	high	high	low
GATCTTGATAGGTTGCAGTC	E) Gandhi S et al., 2016	-26.4	0.0847458	high	high	high	high	high	high	high	high	high	high
GATGGGGTTTGTGGCGTAAC	E) Gandhi S et al., 2016	-27.4	0.254237	low	high	high	high	high	high	low	high	high	high
GATGTGGTTGCTCGGCATCC	E) Gandhi S et al., 2016	-25.9	0.20339	high	high	high	high	high	high	high	high	high	high
GATTGGACCATGACGAGAGA	E) Gandhi S et al., 2016	-24.2	0.169492	low	low	high	high	low	high	low	high	high	high
GCAAACGGAGCACCAAAAAG	E) Gandhi S et al., 2016	-25.2	0.508475	low	high	high	high	high	high	low	high	high	high
GCAACACACGTCTTACCTTC	E) Gandhi S et al., 2016	-25	0.40678	low	high	high	high	low	high	low	high	high	high
GCAAGACAAAACCTTAGAGC	E) Gandhi S et al., 2016	-21.4	0.220339	low	high	high	high	high	high	low	high	high	high
GCAATGCTATCCATTGGGGC	E) Gandhi S et al., 2016	-23.6	0.711864	high	high	high	high	high	high	high	high	high	high
GCATCCACTGGTGCAGGGGT	E) Gandhi S et al., 2016	-26.6	0.779661	low	low	high	high	high	high	high	high	high	low
GCATCGTTAATTCTACTCTG	E) Gandhi S et al., 2016	-25	0	low	low	high	high	high	high	low	low	high	low
GCATCTCGGTGGACAATATG	E) Gandhi S et al., 2016	-23.7	0.338983	low	high	high	high	high	high	low	high	high	low
GCCAGAACGTAGAAATCCGA	E) Gandhi S et al., 2016	-22.9	0.0508475	low	high	high	high	high	high	low	high	high	high
GCCATTCGCTGCGACCGCTG	E) Gandhi S et al., 2016	-24.3	0.491525	low	low	high	high	low	high	high	high	high	high
GCCCGCAATTCAGTACCTGT	E) Gandhi S et al., 2016	-21.8	0.627119	low	high	high	high	high	high	low	high	high	high
GCCCGTACAGTCGCCGGTAT	E) Gandhi S et al., 2016	-21.8	0.508475	low	high	high	high	high	high	low	high	high	high
GCGTAAGATTGTCGCCTGTG	E) Gandhi S et al., 2016	-25.7	0.728814	high	high	high	high	high	high	high	high	high	high
GCGTAGAGGCTGACGTCACG	E) Gandhi S et al., 2016	-24.7	0.59322	high	high	high	high	high	high	high	high	high	high
GCTACAGCACAAATAGATAC	E) Gandhi S et al., 2016	-19.2	0.0508475	low	high	high	high	high	high	low	low	high	high
GCTACGGTAGGGGTAGTAGT	E) Gandhi S et al., 2016	-29.5	0.728814	low	high	high	high	high	high	low	high	high	high
GCTAGAAGTTATCACCACGA	E) Gandhi S et al., 2016	-21.6	0.40678	low	low	high	high	high	high	high	high	high	low
GCTCGGAGACATAGCCAGCG	E) Gandhi S et al., 2016	-28.2	0.661017	low	high	high	high	high	low	high	high	high	high
GCTGAGGGTTGGACAACAGG	E) Gandhi S et al., 2016	-25.7	0.627119	low	high	high	high	high	high	low	high	high	high
GCTGCATAATACGCGGGACC	E) Gandhi S et al., 2016	-23.3	0	high	high	high	high	high	high	high	high	high	high
GCTTAAGGGCGTCGTACGCT	E) Gandhi S et al., 2016	-26.1	0.0847458	low	low	high	high	high	high	low	high	low	low
GCTTACCATTACGTCTTGTG	E) Gandhi S et al., 2016	-24.3	0.389831	low	low	high	high	high	high	low	high	high	low
GCTTACCTTGCTACTTCATC	E) Gandhi S et al., 2016	-21.9	0	low	low	high	high	high	high	low	high	high	high
GCTTAGTCAAAGGGCCGAAT	E) Gandhi S et al., 2016	-24.6	0.389831	low	high	high	high	high	high	low	high	high	high
GGAACCCTTGTTTGATAACT	E) Gandhi S et al., 2016	-25.6	0.135593	low	low	high	high	high	high	low	low	high	high
GGACGAACTGAAGAGATGCG	E) Gandhi S et al., 2016	-24.9	0.542373	low	low	high	high	high	high	high	high	high	high
GGAGCGTCCGCAGTTGTCGC	E) Gandhi S et al., 2016	-23.3	0.0508475	high	high	high	high	high	high	high	high	high	high
GGAGCTTCTCCTGCATCGAG	E) Gandhi S et al., 2016	-23.6	0.627119	low	low	high	high	high	high	low	high	high	low
GGAGTGGTCCAATCCAACTG	E) Gandhi S et al., 2016	-26.7	0.644068	low	high	high	high	high	high	low	high	high	high
GGATGCGGCAGGGGTCTGTA	E) Gandhi S et al., 2016	-29.4	0.728814	low	high	high	high	high	high	low	high	high	high
GGCAACCGAAAACCCACACA	E) Gandhi S et al., 2016	-20	0.20339	low	high	high	high	high	high	low	high	high	high
GGCATCCATCCTCTCACTGC	E) Gandhi S et al., 2016	-19.6	0.0677966	high	high	high	high	high	high	high	high	high	high
GGGAAGTGATTCATCCGTAC	E) Gandhi S et al., 2016	-20.6	0.237288	high	high	high	high	high	high	high	high	high	high
GGGACGACTAGTTGGAAAGG	E) Gandhi S et al., 2016	-28	0.525424	low	high	high	high	high	high	low	high	high	high
GGGAGGGAGTCCTGGAGGGT	E) Gandhi S et al., 2016	-26.9	0.661017	high	high	high	high	high	high	high	high	high	high
GGGCTGCAATCGTATCAACC	E) Gandhi S et al., 2016	-24.1	0.576271	low	high	high	high	high	high	low	high	high	high
GGGGTTCCGCGCCGACTTAA	E) Gandhi S et al., 2016	-27	0.0847458	low	high	high	high	high	high	low	high	high	low
GGGTCATTCTGTCACTGACT	E) Gandhi S et al., 2016	-21.5	0.305085	low	low	high	high	low	high	low	high	high	high
GGTATATATAAGGGGCTCAG	E) Gandhi S et al., 2016	-27.1	0.644068	low	low	high	high	high	high	high	high	high	high
GGTTGAGACTGAGATTGTGA	E) Gandhi S et al., 2016	-25.8	0.644068	low	high	high	high	high	high	low	high	high	low
GTACATCCAGTTCGTAAGTA	E) Gandhi S et al., 2016	-22.1	0.40678	low	low	high	high	high	low	low	low	high	low
GTACGACAGACAAGGGCAGC	E) Gandhi S et al., 2016	-26.1	0.40678	high	high	high	high	high	high	high	high	high	high
GTACTTCGGTGTAAGTCAAT	E) Gandhi S et al., 2016	-25.4	0.389831	low	high	high	high	high	high	low	low	high	low
GTAGACTTACCTCTTGTGAC	E) Gandhi S et al., 2016	-23	0.457627	low	low	high	high	high	high	low	high	high	high
GTAGTGTTGCCGCCCTCCGT	E) Gandhi S et al., 2016	-22	0.542373	low	high	high	high	high	high	high	high	high	low
GTCAAAAGGAGACGAAGACG	E) Gandhi S et al., 2016	-24	0	low	low	high	high	low	high	low	high	high	low
GTGAGCCTTATGTCTCTGCA	E) Gandhi S et al., 2016	-25.3	0.542373	low	low	high	high	high	high	low	high	high	high
GTGATCTGGCAATCACAGCA	E) Gandhi S et al., 2016	-24.3	1	low	high	high	high	high	low	low	high	high	high
GTGCGAATGCACTTACCGAC	E) Gandhi S et al., 2016	-24.9	0.254237	high	high	high	high	high	high	high	high	high	high
GTGTTCATTTAGGCTTACCA	E) Gandhi S et al., 2016	-23.6	0.169492	low	high	high	high	high	high	low	low	high	high
GTTCCCTCCTCCTCCGCAGC	E) Gandhi S et al., 2016	-20.1	0.101695	high	high	high	high	high	high	high	high	high	high
GTTGAACTGCACATCTAAAC	E) Gandhi S et al., 2016	-21.7	0.0338983	low	high	high	high	high	high	low	low	high	low
GTTGGAGAAAATTTCTTTGA	E) Gandhi S et al., 2016	-20.3	0	low	high	high	high	high	high	low	low	low	high
GTTTGTATCCGACGGTACGT	E) Gandhi S et al., 2016	-25.5	0.59322	low	low	high	high	low	high	low	high	high	high
GAAACACTTTCAATTTGATAA	F) Farboud B et al., 2015	-25.6	0	low	high	high	high	high	high	low	low	high	low
GAAACCTGCCTCCTCTCGTTG	F) Farboud B et al., 2015	-23.1	0	low	low	high	high	high	high	low	high	high	low
GAACATTTCCACAACGAGAGG	F) Farboud B et al., 2015	-21.9	0.51	low	low	high	high	low	high	high	high	high	high
GAACGGATGAGAATCTGACAA	F) Farboud B et al., 2015	-25.7	0.21	low	low	high	high	high	high	low	high	high	high
GAATATCGTTTACCAAAACGG	F) Farboud B et al., 2015	-21.3	0.13	low	low	high	high	high	high	low	low	low	low
GAATCAGCCGAGATGTAAGTT	F) Farboud B et al., 2015	-23.9	0	low	high	high	high	high	high	low	high	high	high
GACAATTACAGTGAAGTACAG	F) Farboud B et al., 2015	-19.8	0	low	high	high	high	high	high	low	low	high	high
GAGCGATTTCTGGCGATTGGG	F) Farboud B et al., 2015	-26.8	0.1	low	low	high	high	high	high	low	high	high	low
GATACGCACCGATGCTCTCCG	F) Farboud B et al., 2015	-25.5	0.14	low	low	high	high	high	high	high	high	high	low
GATATGAGGGGAGTGAGGCGG	F) Farboud B et al., 2015	-27.9	0.29	high	high	high	high	high	high	high	high	high	high
GATTACAGTGAAGTACAGCGG	F) Farboud B et al., 2015	-22.6	0.21	high	high	high	high	high	high	high	high	high	high
GCACTTTCAATTTGATAATGG	F) Farboud B et al., 2015	-32.3	0.52	low	high	high	high	high	high	low	low	high	low
GCATTTGATATGAGGGGAGTG	F) Farboud B et al., 2015	-28.8	0.2	low	low	high	high	high	low	high	high	high	high
GCGCACCGATGCTCTCCGAGG	F) Farboud B et al., 2015	-24.5	0.57	low	low	high	high	high	high	high	high	high	low
GCTCGGCTGATTTTCGCAGTT	F) Farboud B et al., 2015	-24.8	0.01	low	high	high	high	high	high	low	high	high	high
GGAACCCGTTGCCGAATACAC	F) Farboud B et al., 2015	-21.9	0.05	low	high	high	high	high	high	low	high	high	high
GGAATATTGAAAGACTATGAT	F) Farboud B et al., 2015	-23.5	0.1	low	high	high	high	high	high	low	low	high	high
GGAATTTTCTGAAATTAAAGA	F) Farboud B et al., 2015	-23.8	0.037	low	low	high	high	high	high	low	low	high	high
GGATAGGAAGCATCAGATTGA	F) Farboud B et al., 2015	-22.4	0	low	low	high	high	high	high	low	low	high	low
GGATCCACAAGTTACAATTGG	F) Farboud B et al., 2015	-21.5	0.803	low	high	high	high	high	high	low	low	high	low
GGATGCTTGTAGTCTGGAACT	F) Farboud B et al., 2015	-26.5	0	low	high	high	high	high	high	low	high	high	high
GGATGGACGGGATGGTAGAGA	F) Farboud B et al., 2015	-29.6	0	low	high	high	high	high	high	low	high	high	high
GGATTGGAGAGTTAGACCACG	F) Farboud B et al., 2015	-25.4	0.2	high	high	high	high	high	high	high	high	high	high
GGCAAGGATCTTCAAAAAGCA	F) Farboud B et al., 2015	-21.9	0.1	low	high	high	high	high	low	low	low	high	high
GGCCTTTGCTTCGATTTTCTT	F) Farboud B et al., 2015	-25.5	0	low	high	low	high	high	high	low	low	high	high
GGCTGAGAGAAGAATCCATCG	F) Farboud B et al., 2015	-22.3	0.15	low	low	high	high	high	high	high	high	high	low
GGGACAAAGAGAGGGGGTGAG	F) Farboud B et al., 2015	-23.4	0.075	high	high	high	high	high	high	high	high	high	high
GGGACATTGACACTAAAATCA	F) Farboud B et al., 2015	-22.8	0.005	low	low	high	high	high	high	low	low	high	high
GGGAGCTTACTGAGACTCTTC	F) Farboud B et al., 2015	-25.8	0.208	low	low	high	high	high	high	low	high	high	high
GGGAGGTTGACTCCAATACTA	F) Farboud B et al., 2015	-28.4	0.014	low	low	high	high	high	high	low	high	high	high
GGGATATCACTTCCCAGAACT	F) Farboud B et al., 2015	-25.6	0	low	low	high	high	high	high	low	high	high	low
GGGATGAGAATCTGACAAAGG	F) Farboud B et al., 2015	-22.7	0.54	low	low	high	high	high	high	low	high	high	high
GGGATGGATGTGTAGTCAATT	F) Farboud B et al., 2015	-30.8	0.181	low	high	high	high	low	high	low	low	high	high
GGGATTTGCTGCTACTGAATC	F) Farboud B et al., 2015	-24.7	0	low	low	high	high	high	high	low	high	high	high
GGGCTCAGATTGACGAGGCGC	F) Farboud B et al., 2015	-26	0.24	high	high	high	high	high	high	high	high	high	high
GGGGAAACTATACCCTCACTG	F) Farboud B et al., 2015	-26.1	0.3	low	low	high	high	high	high	low	high	high	high
GGGGAGAAAGTGATTTGCAGT	F) Farboud B et al., 2015	-26.9	0	low	high	high	high	high	high	low	high	high	low
GGGGCACCATACCGAGTGATG	F) Farboud B et al., 2015	-24.3	1	low	low	high	high	high	high	low	high	high	high
GGGTTTCCTGGAGCTCCGGCT	F) Farboud B et al., 2015	-25.5	0	high	high	high	high	high	high	high	high	high	high
GGTCGGATTCGGCGCTGCATG	F) Farboud B et al., 2015	-28.5	0	low	high	high	high	high	high	low	high	high	high
GGTGGTTGGGATGAGCGATTC	F) Farboud B et al., 2015	-27.8	0	low	high	high	high	high	high	low	high	high	high
GGTTATAGCCTGTTCGGTTAC	F) Farboud B et al., 2015	-26	0.049	low	high	high	high	high	high	low	high	high	high
GGTTATCGTCATCCGGTGACG	F) Farboud B et al., 2015	-25.1	0.1	low	low	high	high	high	high	high	high	high	high
GGTTGAGTGCAGCCATTTGCT	F) Farboud B et al., 2015	-30.6	0.05	low	low	high	high	high	high	low	high	high	low
GGTTGCTGAACTGGGAGAGCT	F) Farboud B et al., 2015	-28.8	0	low	high	high	high	high	high	low	high	high	low
GGTTGGATCATAGGATACCGG	F) Farboud B et al., 2015	-27.2	0.38	low	high	high	high	high	high	high	high	high	low
GTCTAGCGATTTCTGGCGATT	F) Farboud B et al., 2015	-30.3	0	low	high	high	high	low	high	low	high	high	high
GTGGAACATTTCCACAACGAG	F) Farboud B et al., 2015	-24.8	0.08	low	low	high	high	low	high	low	high	low	high
GTTGAATATCGTTTACCAAAA	F) Farboud B et al., 2015	-22.6	0	low	high	high	high	high	high	low	low	high	low
GTTGACTCGTTCCATTTCAGC	F) Farboud B et al., 2015	-23.8	0	low	low	high	high	high	high	low	high	high	high
GAAAAACCAATTTTCTTGGAA	G) Xiang X et al, 2021, (2d)	-21.1	0.0929204	low	low	high	high	high	high	low	low	high	high
GAAAAAGCAGATTGAAGCTAT	G) Xiang X et al, 2021, (2d)	-27.6	0.210591	low	high	high	high	high	high	low	low	high	high
GAAAAAGCCAACCTGCTCCTC	G) Xiang X et al, 2021, (2d)	-23.6	0.202359	low	high	high	high	high	high	high	high	high	low
GAAAAATGCGACAGGACCTGG	G) Xiang X et al, 2021, (2d)	-27.8	0.653753	high	high	high	high	high	high	high	high	high	high
GAAAAATGCGAGCAATTCTTC	G) Xiang X et al, 2021, (2d)	-22.4	0.219644	low	high	high	high	low	high	low	low	high	high
GAAAACAACTTGATATGGAAC	G) Xiang X et al, 2021, (2d)	-25	0.655462	low	low	high	high	high	high	low	low	high	low
GAAAACAACTTGGTCATAGTG	G) Xiang X et al, 2021, (2d)	-23.1	0.5	low	high	high	high	high	low	low	low	high	high
GAAAACAGGGCAGAAGCCTTA	G) Xiang X et al, 2021, (2d)	-34.4	0.325764	low	low	high	high	low	high	low	high	high	high
GAAAACAGTATGCACACTGGA	G) Xiang X et al, 2021, (2d)	-20.6	0.454762	low	high	high	high	high	high	low	high	high	high
GAAAACCACAAGTTACACTCC	G) Xiang X et al, 2021, (2d)	-20.7	0.857143	low	high	high	high	high	high	high	high	high	low
GAAAACCACGAAAAGCGTCCA	G) Xiang X et al, 2021, (2d)	-23.6	0.00449438	high	high	high	high	high	high	high	high	high	high
GAAAACCAGATGGACAAGGCA	G) Xiang X et al, 2021, (2d)	-29.9	0.328767	low	high	high	high	high	low	low	high	high	high
GAAAACGAGCCGACAGCCACG	G) Xiang X et al, 2021, (2d)	-30.2	0.29902	high	high	high	high	high	high	high	high	high	high
GAAAACGATACGCAGGTAGAG	G) Xiang X et al, 2021, (2d)	-23.2	0.464427	low	high	high	high	high	high	low	high	high	high
GAAAACGCCAGTAGCAGAAGA	G) Xiang X et al, 2021, (2d)	-25.3	0.17029	low	high	high	high	high	high	low	high	high	high
GAAAACTCGACTCCAAATGCA	G) Xiang X et al, 2021, (2d)	-21.5	0.291045	low	high	high	high	high	high	low	high	high	high
GAAAACTCGATGTACCTCTTG	G) Xiang X et al, 2021, (2d)	-22.6	0.249399	low	low	high	high	high	high	low	high	high	low
GAAAAGACCAGATGACTTGCT	G) Xiang X et al, 2021, (2d)	-28	0.328889	low	low	high	high	high	high	low	high	high	high
GAAAAGCCAACCTGCTCCTCG	G) Xiang X et al, 2021, (2d)	-23.8	0.353591	low	low	high	high	high	high	high	high	high	low
GAAAAGCCCAGGCTTTCCCCT	G) Xiang X et al, 2021, (2d)	-25.1	0.576214	low	high	high	high	high	high	high	high	low	high
GAAAAGCCGAGACCAGGAGGC	G) Xiang X et al, 2021, (2d)	-23.1	0.15873	high	high	high	high	high	high	high	high	high	high
GAAAAGGCCATTTTTCTCTCA	G) Xiang X et al, 2021, (2d)	-21.1	0.297663	low	low	high	high	high	high	low	low	high	low
GAAAATCCAGGCGAGTTTTCG	G) Xiang X et al, 2021, (2d)	-24.3	0.27686	low	high	high	high	low	high	low	high	high	high
GAAAATGCAACTCAATTACAA	G) Xiang X et al, 2021, (2d)	-18.9	1	low	high	high	high	high	high	low	low	high	high
GAAAATGCCGAGGCCTCTGGT	G) Xiang X et al, 2021, (2d)	-27.4	0.349107	low	high	high	high	low	high	low	high	high	high
GAAAATTCAAGCCATGTGGAG	G) Xiang X et al, 2021, (2d)	-23.1	0	low	low	high	high	high	high	high	high	high	low
GAAAATTGCAAATCCTGAGAG	G) Xiang X et al, 2021, (2d)	-19.3	0.398931	low	low	high	high	high	high	low	low	high	high
GAAACAAACGATGGTCTGACA	G) Xiang X et al, 2021, (2d)	-24.4	0.402027	low	high	high	high	high	high	low	high	high	high
GAAACAACCTGAATCCAACTT	G) Xiang X et al, 2021, (2d)	-22.8	0.0939794	low	high	high	high	high	high	low	low	high	high
GAAACAAGCTTATACACAATT	G) Xiang X et al, 2021, (2d)	-22.1	0.530194	low	high	high	high	high	high	low	low	high	high
GAAACAAGTGGAAATGTCTTA	G) Xiang X et al, 2021, (2d)	-28	0.246903	low	low	high	high	high	high	low	low	high	low
GAAACACCAGATTCACCGACG	G) Xiang X et al, 2021, (2d)	-22.7	1	low	low	high	high	low	high	high	high	high	high
GAAACACCCACTCTCCCCCTC	G) Xiang X et al, 2021, (2d)	-21.4	1	high	high	high	high	high	high	high	high	high	high
GAAACAGAAACAGCTTAGTGA	G) Xiang X et al, 2021, (2d)	-22.8	0.562044	low	high	high	high	high	high	low	low	high	high
GAAACAGAAAGGCCGGATGCT	G) Xiang X et al, 2021, (2d)	-26.9	0.445977	low	low	high	high	high	high	low	high	high	high
GAAACAGACCCAGTACTACTT	G) Xiang X et al, 2021, (2d)	-27.1	0.244656	low	high	high	high	low	high	low	high	high	high
GAAACAGCCGATCTTCCCTGC	G) Xiang X et al, 2021, (2d)	-24.9	0.22179	high	high	high	high	high	high	high	high	high	high
GAAACAGCCTAAATCCGAAGC	G) Xiang X et al, 2021, (2d)	-21.9	0.202786	low	low	high	high	high	high	high	high	high	low
GAAACAGCTCACTCAGATTGA	G) Xiang X et al, 2021, (2d)	-25.6	0.345854	low	low	high	high	high	high	low	high	high	low
GAAACAGGAGCATCCTGAATG	G) Xiang X et al, 2021, (2d)	-23.4	0.336842	low	high	high	high	high	high	low	high	high	high
GAAACAGGAGCGAGAGCCTGT	G) Xiang X et al, 2021, (2d)	-31.3	0.249012	low	high	high	high	low	high	high	high	high	high
GAAACAGGCAGTCTGTTCCAA	G) Xiang X et al, 2021, (2d)	-24.8	0.274841	low	high	high	high	high	high	low	high	high	high
GAAACAGGCGTGTCTGCCCTC	G) Xiang X et al, 2021, (2d)	-28.6	0.336357	high	high	high	high	high	high	high	high	high	high
GAAACAGGTGCTATCCCTCGG	G) Xiang X et al, 2021, (2d)	-25.7	0.580544	high	high	high	high	high	high	high	high	high	high
GAAACAGTTAACCCTGAACCT	G) Xiang X et al, 2021, (2d)	-22.7	0.606999	low	high	high	high	high	high	low	high	high	high
GAAACATCCAGCGGCTGCAAG	G) Xiang X et al, 2021, (2d)	-28.6	0.134783	low	high	high	high	high	high	low	high	high	high
GAAACCAAGCGTACACTCCAC	G) Xiang X et al, 2021, (2d)	-23.5	0	high	high	high	high	high	high	high	high	high	high
GAAACCACAAGTTACACTCCA	G) Xiang X et al, 2021, (2d)	-21	1	low	high	high	high	high	high	low	high	high	low
GAAACCACACGCTGGACTGGT	G) Xiang X et al, 2021, (2d)	-30.3	0.563715	low	high	high	high	high	high	low	high	high	high
GAAACCACAGGCCCTGGACTC	G) Xiang X et al, 2021, (2d)	-25.2	0.09271	low	low	high	high	high	high	high	high	high	high
GAAACCACGAAAAGCGTCCAG	G) Xiang X et al, 2021, (2d)	-22.6	0.194444	low	low	high	high	high	high	high	high	high	low
GAAACCACGTCGACACCTCAG	G) Xiang X et al, 2021, (2d)	-23.1	0	high	high	high	high	high	high	high	high	high	high
GAAACCAGAAGATCCCCATAG	G) Xiang X et al, 2021, (2d)	-20.7	0.399194	low	low	high	high	high	high	low	high	high	low
GAAACCAGAGACTTGAATTAT	G) Xiang X et al, 2021, (2d)	-21.8	0.411848	low	low	high	high	high	high	low	low	high	high
GAAACCAGATACTTAAATGAT	G) Xiang X et al, 2021, (2d)	-18.5	0.283186	low	high	high	high	high	high	low	low	high	high
GAAACCAGCTGTCCCAGAACC	G) Xiang X et al, 2021, (2d)	-20.9	0.296233	low	high	high	high	high	high	low	high	high	high
GAAACCAGGGCTGGTTCTCGA	G) Xiang X et al, 2021, (2d)	-29.8	0.352037	low	high	high	high	high	high	low	high	high	high
GAAACCAGTTGAGTGTACCAA	G) Xiang X et al, 2021, (2d)	-22.3	0.196537	low	high	high	high	high	high	low	high	high	low
GAAACCATTCCACCATGAGCT	G) Xiang X et al, 2021, (2d)	-21.6	0.875	low	high	high	high	high	high	low	high	high	high
GAAACCCAAGGATCCAAGATC	G) Xiang X et al, 2021, (2d)	-21.5	0	low	high	high	high	high	high	low	high	high	high
GAAACCCAGGACAACACCACC	G) Xiang X et al, 2021, (2d)	-23.8	0	high	high	high	high	high	high	high	high	high	high
GAAACCGAGTTAAGAAGACCA	G) Xiang X et al, 2021, (2d)	-23.9	0.746667	low	low	high	high	high	high	low	high	high	low
GAAACCGTCGAACTGCCAATG	G) Xiang X et al, 2021, (2d)	-25.3	0.610544	low	high	high	high	high	high	low	high	high	high
GAAACGAACAACAAAGAGAGC	G) Xiang X et al, 2021, (2d)	-21.1	0.376068	low	low	high	high	high	high	high	high	high	low
GAAACGACTGCCCTTCTGCAA	G) Xiang X et al, 2021, (2d)	-27.5	0.772994	low	high	high	high	low	high	low	high	high	high
GAAACGCGATGTAAGGAAGCC	G) Xiang X et al, 2021, (2d)	-28.7	1	high	high	high	high	high	high	high	high	high	high
GAAACGTGCAGCCGGAGGATG	G) Xiang X et al, 2021, (2d)	-27.9	0.103022	low	high	high	high	high	high	low	high	high	high
GAAACTCCCAGGAACAGACTC	G) Xiang X et al, 2021, (2d)	-23.9	0.140584	low	high	high	high	high	high	low	high	high	high
GAAACTGTCCAGAGCACAGTG	G) Xiang X et al, 2021, (2d)	-21.1	0.291322	low	high	high	high	high	low	low	high	high	high
GAAACTTCCAGTATCCTTCGT	G) Xiang X et al, 2021, (2d)	-20.6	0.319266	low	high	high	high	low	high	low	high	high	high
GAAAGAACAGTTTGGCCAAGA	G) Xiang X et al, 2021, (2d)	-25.4	0.280612	low	high	high	high	high	high	low	high	high	high
GAAAGAACCAGGCAGCCACCT	G) Xiang X et al, 2021, (2d)	-27.7	0.597846	high	high	high	high	high	high	high	high	high	high
GAAAGAACGAATTCAGAATGC	G) Xiang X et al, 2021, (2d)	-21.6	0.392655	low	high	high	high	high	high	low	low	high	high
GAAAGAAGAGTGGGAAATTGA	G) Xiang X et al, 2021, (2d)	-21.3	0.410405	low	low	high	high	high	high	low	low	high	high
GAAAGAAGCAAGGATACAGCA	G) Xiang X et al, 2021, (2d)	-24.5	0.464889	low	high	high	high	high	low	low	high	high	high
GAAAGAAGGATTGTCCAAATG	G) Xiang X et al, 2021, (2d)	-25.6	0.182955	low	high	high	high	high	high	low	low	high	high
GAAAGAAGGTCACTGAAGGAA	G) Xiang X et al, 2021, (2d)	-20.8	0.391781	low	low	high	high	high	high	low	high	high	low
GAAAGACAAAAGAGAGTCTTC	G) Xiang X et al, 2021, (2d)	-24.8	0.00311526	low	high	high	high	high	high	low	low	high	high
GAAAGACAATATGAAGCAGAA	G) Xiang X et al, 2021, (2d)	-20.6	0	low	high	high	high	high	high	low	low	high	high
GAAAGACCGACCATTCTTCCC	G) Xiang X et al, 2021, (2d)	-22.9	0.330612	low	high	high	high	low	high	high	high	high	high
GAAAGACTCGACTTCGAGCCA	G) Xiang X et al, 2021, (2d)	-27.2	0.0769231	high	high	high	high	high	high	high	high	high	high
GAAAGAGCAAGAGATTCTGAA	G) Xiang X et al, 2021, (2d)	-21.5	0.347359	low	high	high	high	high	high	low	low	high	low
GAAAGAGCCACACCTTCATGT	G) Xiang X et al, 2021, (2d)	-22	0.2811	low	low	high	high	high	high	low	high	high	high
GAAAGAGCCAGGAGACAAGGA	G) Xiang X et al, 2021, (2d)	-22.4	0.519886	low	high	high	high	high	high	low	high	high	high
GAAAGATCCAGTTTTCGCCAC	G) Xiang X et al, 2021, (2d)	-24.7	1	high	high	high	high	high	high	high	high	high	high
GAAAGATTCAGCTGACATTTG	G) Xiang X et al, 2021, (2d)	-22.6	0.308348	low	high	high	high	high	high	low	low	high	high
GAAAGCAACCAAGAAATATAG	G) Xiang X et al, 2021, (2d)	-19.4	0.376884	low	low	high	high	high	high	low	low	high	low
GAAAGCAACTGGCCTCGGGAA	G) Xiang X et al, 2021, (2d)	-29.2	0.38632	high	high	high	high	high	high	high	high	high	high
GAAAGCAGAAGGTGTTCCGCC	G) Xiang X et al, 2021, (2d)	-23.6	0.182961	high	high	high	high	high	high	high	high	high	high
GAAAGCAGATTGAAGAGCTGA	G) Xiang X et al, 2021, (2d)	-28.3	0.22372	low	high	high	high	high	high	low	high	high	high
GAAAGCAGCACGTGGTGTCTG	G) Xiang X et al, 2021, (2d)	-28.2	0.209953	low	low	high	high	high	high	low	high	high	low
GAAAGCAGGTAGCAGAGAAAC	G) Xiang X et al, 2021, (2d)	-22.9	0.385151	low	high	high	high	high	high	low	high	high	high
GAAAGCAGTTGCTCCAAGACG	G) Xiang X et al, 2021, (2d)	-22.6	0.236967	low	low	high	high	high	high	low	high	high	low
GAAAGCCAAGAGCTGAGCAAC	G) Xiang X et al, 2021, (2d)	-24.2	0.140884	low	high	high	high	high	high	low	high	high	high
GAAAGCCACAAGAATCCGCAC	G) Xiang X et al, 2021, (2d)	-19.8	0.381579	high	high	high	high	high	high	high	high	high	high
GAAAGCCAGTACCAGCTGTTA	G) Xiang X et al, 2021, (2d)	-23.8	0.398946	low	high	high	high	high	high	low	high	high	high
GAAAGCCAGTCGTTGATGCCA	G) Xiang X et al, 2021, (2d)	-24.6	0.553173	low	high	high	high	high	high	low	high	high	low
GAAAGCCAGTCTGATGGGCAA	G) Xiang X et al, 2021, (2d)	-28.3	0.310968	low	low	high	high	low	high	high	high	high	high
GAAAGCCGAAGAGACTGGGGC	G) Xiang X et al, 2021, (2d)	-25.9	0.182955	high	high	high	high	high	high	high	high	high	high
GAAAGCGAATCTCTAAGGAGA	G) Xiang X et al, 2021, (2d)	-23.9	0.00806452	low	high	high	high	high	high	low	high	high	high
GAAAGCGAATTACCTCAGAAC	G) Xiang X et al, 2021, (2d)	-24.3	1	low	high	high	high	high	high	low	high	high	high
GAAAGCGATTGAAGCAAGCCA	G) Xiang X et al, 2021, (2d)	-26.2	0.017094	low	high	high	high	high	high	low	high	high	high
GAAAGCTCCAGGAGCGTCCGA	G) Xiang X et al, 2021, (2d)	-25.8	0.471173	low	low	high	high	high	high	high	high	high	low
GAAAGCTCCAGTTAGGTCCTT	G) Xiang X et al, 2021, (2d)	-26.8	0.136686	low	high	low	high	low	high	low	high	high	high
GAAAGCTTCAGTATAACCTAG	G) Xiang X et al, 2021, (2d)	-22.4	0.6875	low	high	high	high	high	high	low	low	high	low
GAAAGGACAAGTTTCAGTTAA	G) Xiang X et al, 2021, (2d)	-24.9	0.20436	low	low	high	high	high	high	low	low	high	high
GAAAGGAGCAGAGCAAAACCG	G) Xiang X et al, 2021, (2d)	-23	0.294416	low	high	high	high	high	high	low	high	high	high
GAAAGGCCCAGATACCCAAGA	G) Xiang X et al, 2021, (2d)	-20.7	1	low	high	high	high	high	high	low	high	high	high
GAAAGGCGAAGCCCAGTGCCG	G) Xiang X et al, 2021, (2d)	-25.5	0.523596	high	high	high	high	high	high	high	high	high	high
GAAAGGGCCAGTGATCACCTT	G) Xiang X et al, 2021, (2d)	-29.7	0.373062	low	high	low	high	high	high	low	high	high	high
GAAAGGGCCAGTGGAAATTCA	G) Xiang X et al, 2021, (2d)	-23.2	0.0563003	low	high	high	high	high	high	low	high	high	high
GAAAGGTCAAGACACTGTCAA	G) Xiang X et al, 2021, (2d)	-22.9	0.213789	low	high	high	high	high	high	low	high	high	high
GAAAGGTGCGACAGTGCCTGC	G) Xiang X et al, 2021, (2d)	-28.4	0.32439	high	high	high	high	high	high	high	high	high	high
GAAAGTCCAACAAAAGGAAGG	G) Xiang X et al, 2021, (2d)	-21.4	0.559441	low	low	high	high	high	high	high	high	high	high
GAAAGTCCAGGTATTATTTTC	G) Xiang X et al, 2021, (2d)	-21.1	0.121573	low	high	high	high	high	high	low	low	high	high
GAAAGTCCAGTTGAGGGCAAT	G) Xiang X et al, 2021, (2d)	-26.3	0.377678	low	high	high	high	high	high	low	high	high	low
GAAAGTCCATTTGACAAAGCC	G) Xiang X et al, 2021, (2d)	-25.1	0.783471	low	high	high	high	high	high	low	high	high	high
GAAAGTCCCAGTTGCTGGGGT	G) Xiang X et al, 2021, (2d)	-25.5	0.553153	low	high	high	high	high	high	high	high	low	high
GAAAGTGCAAGTAGAGTACAA	G) Xiang X et al, 2021, (2d)	-22.3	0.158289	low	high	high	high	high	high	low	low	high	low
GAAAGTTCCAGGTGTGGGTGA	G) Xiang X et al, 2021, (2d)	-24.9	0.388389	low	high	high	high	high	high	high	high	high	low
GAAAGTTTCCACTCGGCGCCC	G) Xiang X et al, 2021, (2d)	-29.1	0.173307	low	low	high	high	high	high	low	high	high	low
GAAATACCAGTTCCAGGCCTG	G) Xiang X et al, 2021, (2d)	-26.7	0.00469043	high	high	high	high	high	high	high	high	high	high
GAAATACCCAATCTGGGCAGC	G) Xiang X et al, 2021, (2d)	-26.3	0.168693	high	high	high	high	high	high	high	high	high	high
GAAATATTCCAGTCCTTGTCA	G) Xiang X et al, 2021, (2d)	-21	0.0742616	low	low	high	high	high	high	low	low	high	high
GAAATATTTACCAGAAAATCA	G) Xiang X et al, 2021, (2d)	-17.7	0.723192	low	high	high	high	high	high	low	low	high	high
GAAATCAAGGGCAACAGTATG	G) Xiang X et al, 2021, (2d)	-25.7	0.287257	low	high	high	high	high	high	low	high	high	high
GAAATCAGATTCATACTGGAA	G) Xiang X et al, 2021, (2d)	-22.7	0.0245902	low	high	high	high	high	high	low	low	high	high
GAAATCAGCCAGAGGGAAGCA	G) Xiang X et al, 2021, (2d)	-24.8	0.60091	low	high	high	high	high	low	low	high	high	high
GAAATCAGCTCCATGAACGAG	G) Xiang X et al, 2021, (2d)	-23.5	0.98	low	low	high	high	high	high	low	high	high	low
GAAATCCCAGTACCTGCAACT	G) Xiang X et al, 2021, (2d)	-20.9	0.526316	low	high	high	high	high	high	low	high	high	high
GAAATGACCAGGACACCCTCA	G) Xiang X et al, 2021, (2d)	-27.2	0.118644	high	high	high	high	high	high	high	high	high	high
GAAATGCAGTTGCTGAAAGGG	G) Xiang X et al, 2021, (2d)	-22.3	0.393996	low	low	high	high	high	high	low	high	high	low
GAAATGCCCAGAGCTGGATGA	G) Xiang X et al, 2021, (2d)	-24.4	0.304891	low	low	high	high	high	high	low	high	high	high
GAAATGGCCATCTCATTGGTT	G) Xiang X et al, 2021, (2d)	-25.9	0.418129	low	low	high	high	high	high	low	high	high	low
GAAATGGCCCAAATCATTGTG	G) Xiang X et al, 2021, (2d)	-21.8	0.48855	low	high	high	high	high	high	low	high	high	high
GAAATGTGCAGCTTCCTGGCA	G) Xiang X et al, 2021, (2d)	-24.2	0.28351	low	high	high	high	high	low	high	high	high	high
GAAATTACCAAGAATACAATC	G) Xiang X et al, 2021, (2d)	-17.5	0.60101	low	high	high	high	high	high	low	low	high	high
GAAATTCAGGCGTCGAGGACC	G) Xiang X et al, 2021, (2d)	-24.5	0.440585	low	low	high	high	high	high	high	high	high	low
GAAATTCTCAGCCCCCTGTAC	G) Xiang X et al, 2021, (2d)	-21	0.279452	low	low	high	high	high	high	low	high	high	low
GAAATTGCAAATCCTGAGAGT	G) Xiang X et al, 2021, (2d)	-19.4	0.340594	low	high	high	high	high	high	low	low	high	high
GAAATTGCAAGAGAAGTCCTC	G) Xiang X et al, 2021, (2d)	-24.8	0.34015	high	high	high	high	high	high	high	high	high	high
GAAATTTTCAAGCTTTTGATG	G) Xiang X et al, 2021, (2d)	-25.2	0	low	low	high	high	high	high	low	low	high	low
GAACAACAGATGATGTATGCA	G) Xiang X et al, 2021, (2d)	-24.8	0.23348	low	high	high	high	high	high	low	low	high	high
GAACAACAGCCACTGATGGGC	G) Xiang X et al, 2021, (2d)	-24.8	0.764706	high	high	high	high	high	high	high	high	high	high
GAACAAGCCAGGTGCAGTGAA	G) Xiang X et al, 2021, (2d)	-22.6	0.369492	low	high	high	high	high	high	low	high	high	high
GAACAATGCAGAATTTCCAGA	G) Xiang X et al, 2021, (2d)	-19.4	0	low	high	high	high	high	high	low	low	high	high
GAACAATTCAGAGTTTTGAAC	G) Xiang X et al, 2021, (2d)	-22.6	0.136364	low	low	high	high	high	high	low	low	high	low
GAACACAGGACCGCAAGGCAC	G) Xiang X et al, 2021, (2d)	-25.1	0.71875	high	high	high	high	high	high	high	high	high	high
GAACACCAGAAGCAGCATCTC	G) Xiang X et al, 2021, (2d)	-22.6	1	low	low	high	high	high	high	low	high	high	low
GAACACCAGAGTTTCCTGCAA	G) Xiang X et al, 2021, (2d)	-20.7	0.136977	low	low	high	high	high	high	low	high	high	low
GAACACCAGGCATAAGTCACC	G) Xiang X et al, 2021, (2d)	-22.8	0.00746269	high	high	high	high	high	high	high	high	high	high
GAACACGACAGGTGTGTCCAT	G) Xiang X et al, 2021, (2d)	-25.1	0.388711	low	high	high	high	high	high	low	high	high	high
GAACACGATCATTAATTAGTA	G) Xiang X et al, 2021, (2d)	-23.6	0.463466	low	high	high	high	high	low	low	low	high	high
GAACACTCCAGAGATCCACGG	G) Xiang X et al, 2021, (2d)	-21.6	0.994382	low	low	high	high	high	high	high	high	high	low
GAACAGACCACAGGGGCTGAG	G) Xiang X et al, 2021, (2d)	-24.7	0.339888	high	high	high	high	high	high	high	high	high	high
GAACAGCAGGGCCTGGCCTCT	G) Xiang X et al, 2021, (2d)	-34.9	0.322061	low	high	high	high	low	high	high	high	high	high
GAACAGCAGGTGGCAAAGCGA	G) Xiang X et al, 2021, (2d)	-23.9	0.362812	low	high	high	high	high	high	low	high	high	high
GAACAGCCACCGAGGGGACTC	G) Xiang X et al, 2021, (2d)	-26.1	0.707143	low	low	high	high	high	high	high	high	high	high
GAACAGCCACTCTGGGATCCT	G) Xiang X et al, 2021, (2d)	-25.4	0.264249	low	high	high	high	high	high	low	high	high	high
GAACAGCCCAGATTGGCATCG	G) Xiang X et al, 2021, (2d)	-27.5	0.296644	high	high	high	high	high	high	high	high	high	high
GAACAGCCCAGGAGACTTCGG	G) Xiang X et al, 2021, (2d)	-22.8	0.801418	low	low	high	high	high	high	high	high	high	low
GAACAGCGCGATTCATGGCCG	G) Xiang X et al, 2021, (2d)	-30.1	0.170468	high	high	high	high	high	high	high	high	high	high
GAACAGGCAGCTGTTGGTTCT	G) Xiang X et al, 2021, (2d)	-26.3	0.16623	low	high	high	high	high	high	low	high	high	high
GAACATCCAGCCCATGTACCT	G) Xiang X et al, 2021, (2d)	-21.2	0.673529	low	high	high	high	high	high	low	high	high	high
GAACATCCAGCTGGACATTGA	G) Xiang X et al, 2021, (2d)	-23.5	0.394508	low	high	high	high	high	high	low	high	high	high
GAACCAAAAATACAACACCCA	G) Xiang X et al, 2021, (2d)	-20	0.205882	low	high	high	high	high	high	high	low	high	high
GAACCAAAACAAGTGGACACT	G) Xiang X et al, 2021, (2d)	-23.3	0.255556	low	high	high	high	high	high	low	high	high	low
GAACCAAACAGATCAGAACAC	G) Xiang X et al, 2021, (2d)	-21.4	0.990196	low	high	high	high	high	high	low	high	high	high
GAACCAAGAGCATGAAAGCCA	G) Xiang X et al, 2021, (2d)	-23.9	0	low	high	high	high	high	high	low	high	high	low
GAACCAAGCAAATCCAGGAAC	G) Xiang X et al, 2021, (2d)	-20.6	0.0124224	low	low	high	high	high	high	low	high	high	low
GAACCAAGTCACAATTGGGGT	G) Xiang X et al, 2021, (2d)	-24.1	0.128884	low	low	high	high	high	high	high	high	high	low
GAACCAATACTTCGGCTACTC	G) Xiang X et al, 2021, (2d)	-23.5	0.991667	low	high	high	high	high	high	low	high	high	high
GAACCACCTCACAAAGCCCTG	G) Xiang X et al, 2021, (2d)	-23.7	0.466077	high	high	high	high	high	high	high	high	high	high
GAACCACTGGAATTCAGCCAT	G) Xiang X et al, 2021, (2d)	-29.4	0.152284	low	high	high	high	high	high	low	high	high	high
GAACCACTGTCGGGCCTCGAT	G) Xiang X et al, 2021, (2d)	-26.1	0.23596	low	high	high	high	low	high	low	high	high	high
GAACCACTTGATTGTAGGTTG	G) Xiang X et al, 2021, (2d)	-25.5	0.342857	low	low	high	high	high	high	low	high	high	low
GAACCAGAACCTGAAGGAGCA	G) Xiang X et al, 2021, (2d)	-23.2	0.095064	low	low	high	high	high	low	high	high	high	high
GAACCAGACAGACATCAACGT	G) Xiang X et al, 2021, (2d)	-23.1	0.285714	low	high	high	high	high	high	low	high	high	high
GAACCAGACCATCGCCACCTC	G) Xiang X et al, 2021, (2d)	-22.1	0.187175	high	high	high	high	high	high	high	high	high	high
GAACCAGACGCAGCCTGAGAG	G) Xiang X et al, 2021, (2d)	-26.4	0.342049	low	high	high	high	high	high	low	high	high	high
GAACCAGACGCCCCCACCAGA	G) Xiang X et al, 2021, (2d)	-20.9	0.629508	low	high	high	high	high	high	low	high	high	high
GAACCAGACGGATATCAACGT	G) Xiang X et al, 2021, (2d)	-27.8	0.577103	low	high	high	high	high	high	low	high	high	high
GAACCAGAGCTTAAAGCGATT	G) Xiang X et al, 2021, (2d)	-24	0.0931373	low	high	high	high	high	high	low	high	high	high
GAACCAGATGTGGAACCGAGA	G) Xiang X et al, 2021, (2d)	-22.6	0.165211	high	high	high	high	high	high	high	high	high	high
GAACCAGCAGCCCCTCTCTGG	G) Xiang X et al, 2021, (2d)	-24.5	0.104308	high	high	high	high	high	high	high	high	high	high
GAACCAGCCCCAGAGCAGCGA	G) Xiang X et al, 2021, (2d)	-22.6	0.880597	low	low	high	high	high	high	high	high	high	low
GAACCAGCCTCGAGGTCCAGT	G) Xiang X et al, 2021, (2d)	-24.7	0.00431034	low	high	high	high	high	high	low	high	high	high
GAACCAGCCTGCTGGGGCAGG	G) Xiang X et al, 2021, (2d)	-27.8	0.141002	low	low	high	high	high	high	high	high	high	low
GAACCAGCCTGTGTTTCTGGC	G) Xiang X et al, 2021, (2d)	-29.1	0.21887	low	low	high	high	high	high	high	high	high	high
GAACCAGCTGGTGGAGACCGG	G) Xiang X et al, 2021, (2d)	-25.5	0.342058	high	high	high	high	high	high	high	high	high	high
GAACCAGCTGTCCCAGAACCG	G) Xiang X et al, 2021, (2d)	-21	0.623229	high	high	high	high	high	high	high	high	high	high
GAACCAGCTTTCTGTGCCTTT	G) Xiang X et al, 2021, (2d)	-27.6	0.396034	low	high	low	high	low	high	low	high	high	high
GAACCAGGAAATGTATGCCAT	G) Xiang X et al, 2021, (2d)	-27.3	0.554878	low	high	high	high	high	high	low	high	high	high
GAACCAGGAGAGGTGAGGCTC	G) Xiang X et al, 2021, (2d)	-26.1	0.220183	low	low	high	high	high	high	high	high	high	low
GAACCAGGAGCCCCCATGGAC	G) Xiang X et al, 2021, (2d)	-23.9	0.204482	low	high	high	high	high	high	low	high	high	low
GAACCAGGAGGAAGTGGTGGC	G) Xiang X et al, 2021, (2d)	-25.4	0.440594	low	high	high	high	high	high	high	high	high	low
GAACCAGGAGTCCTTCATGAA	G) Xiang X et al, 2021, (2d)	-23.3	0.991848	low	high	high	high	high	high	low	high	high	high
GAACCAGGCCAGCGTGGAGAA	G) Xiang X et al, 2021, (2d)	-24	0.368231	low	low	high	high	high	high	low	high	high	low
GAACCAGGCGGGCGGAGACCT	G) Xiang X et al, 2021, (2d)	-32.8	0.355183	low	high	high	high	high	high	low	high	high	high
GAACCAGGGCAAATGTAAAGA	G) Xiang X et al, 2021, (2d)	-22.4	0.041206	low	high	high	high	high	high	low	high	high	high
GAACCAGGGGCTCTACCGCCT	G) Xiang X et al, 2021, (2d)	-29.1	0.267045	high	high	high	high	high	high	high	high	high	high
GAACCAGGTGCCACGGAGTGT	G) Xiang X et al, 2021, (2d)	-29.1	0.233859	low	high	high	high	high	high	low	high	high	low
GAACCAGTAGAGGTCAGTGTC	G) Xiang X et al, 2021, (2d)	-26.5	0.255096	low	high	high	high	high	high	low	high	high	high
GAACCAGTCCAATGTCATGCC	G) Xiang X et al, 2021, (2d)	-22.2	0.263852	high	high	high	high	high	high	high	high	high	high
GAACCAGTCCCCAGTGGATCA	G) Xiang X et al, 2021, (2d)	-23.5	0.558158	low	low	high	high	high	high	low	high	high	high
GAACCAGTGCCGGGCAGACAC	G) Xiang X et al, 2021, (2d)	-26.5	0.644898	low	high	high	high	high	high	low	high	high	high
GAACCAGTTTAACAGAGGTGG	G) Xiang X et al, 2021, (2d)	-22.3	0.535256	high	high	high	high	high	high	high	high	high	high
GAACCAGTTTAACTGGCCTTT	G) Xiang X et al, 2021, (2d)	-31.7	0.107444	low	high	low	high	high	high	low	high	high	high
GAACCAGTTTGTATACCGAGA	G) Xiang X et al, 2021, (2d)	-21	0.304452	low	low	high	high	low	high	high	high	high	low
GAACCATGTTAGGCGTTGAGG	G) Xiang X et al, 2021, (2d)	-20.9	0.529595	low	high	high	high	high	high	low	high	high	high
GAACCCAACGACTGAAGATTA	G) Xiang X et al, 2021, (2d)	-23.9	0.26387	low	low	high	high	low	high	low	high	high	high
GAACCCAACGGCTTACTTTCA	G) Xiang X et al, 2021, (2d)	-26.8	0.227516	low	high	high	high	low	high	low	high	high	high
GAACCCAAGAGGCCCCACTTT	G) Xiang X et al, 2021, (2d)	-24.1	0	low	high	low	high	high	high	low	high	high	high
GAACCCACTGGAAGCCGCGCA	G) Xiang X et al, 2021, (2d)	-26	0.224292	high	high	high	high	high	high	high	high	high	high
GAACCCAGAAGGAAATTGAGC	G) Xiang X et al, 2021, (2d)	-22.4	0.424658	low	high	high	high	high	high	low	high	high	high
GAACCCAGCACCGGCTGCTGG	G) Xiang X et al, 2021, (2d)	-32.1	0.329738	low	low	high	high	high	high	high	high	low	low
GAACCCAGCGCAGGGCTGTCC	G) Xiang X et al, 2021, (2d)	-27.8	0.399225	high	high	high	high	high	high	high	high	high	high
GAACCCAGGAATAAGGGAAAG	G) Xiang X et al, 2021, (2d)	-27.5	0.24477	low	low	high	high	high	high	low	high	high	low
GAACCCAGGTCTCGGAGCCCG	G) Xiang X et al, 2021, (2d)	-29.7	0.8	high	high	high	high	high	high	high	high	high	high
GAACCCAGTGGTAGTCCATGG	G) Xiang X et al, 2021, (2d)	-28.7	0.278673	low	low	high	high	high	high	high	high	high	low
GAACCCATCCTCGGCCATATC	G) Xiang X et al, 2021, (2d)	-21.7	0.183403	low	high	high	high	high	high	low	high	high	high
GAACCCCAACTGGCGGGCGAC	G) Xiang X et al, 2021, (2d)	-27.2	0.287474	low	low	high	high	low	high	high	high	high	high
GAACCCCACACGGAGTGGGGT	G) Xiang X et al, 2021, (2d)	-30.3	0.237069	low	high	high	high	high	high	high	high	low	high
GAACCCCAGAGCTGCGCCCTC	G) Xiang X et al, 2021, (2d)	-24.7	0.355109	high	high	high	high	high	high	high	high	high	high
GAACCCCAGGCCCGTCGTCAC	G) Xiang X et al, 2021, (2d)	-21.4	0.290196	high	high	high	high	high	high	high	high	high	high
GAACCCCAGGGCATGGTGTAG	G) Xiang X et al, 2021, (2d)	-27.9	0.391781	low	high	high	high	high	high	low	high	high	high
GAACCCCAGTGTGGGAGGTGC	G) Xiang X et al, 2021, (2d)	-24.2	0.432489	low	high	high	high	high	high	high	high	low	high
GAACCCCCAGTTCATTGTGGA	G) Xiang X et al, 2021, (2d)	-21.2	0.349481	low	high	high	high	high	high	low	high	high	high
GAACCCGCAGTCCGGGCTGCC	G) Xiang X et al, 2021, (2d)	-31.7	0.00587084	high	high	high	high	high	high	high	high	high	high
GAACCCTCAGCACGGCGGCGG	G) Xiang X et al, 2021, (2d)	-25.8	0.547458	low	high	high	high	high	high	low	high	high	high
GAACCCTTCAGAGGAGAGACT	G) Xiang X et al, 2021, (2d)	-22.8	0.198653	low	low	high	high	high	high	low	high	high	high
GAACCGAAGATTTGTACTTTG	G) Xiang X et al, 2021, (2d)	-25.4	0.201784	low	low	high	high	high	high	low	low	high	low
GAACCGAAGGGCATCTGTGAG	G) Xiang X et al, 2021, (2d)	-24.2	0.380653	low	high	high	high	high	high	low	high	high	high
GAACCGAATCATCACAGCCGA	G) Xiang X et al, 2021, (2d)	-25.9	0.473684	high	high	high	high	high	high	high	high	high	high
GAACCGACGTCACCGGATGCC	G) Xiang X et al, 2021, (2d)	-27.8	0.339339	high	high	high	high	high	high	high	high	high	high
GAACCGAGAGGCCACAGTGAA	G) Xiang X et al, 2021, (2d)	-24.7	0.137436	low	high	high	high	high	high	low	high	high	high
GAACCGATTCCTGAACCCTGA	G) Xiang X et al, 2021, (2d)	-22.8	0.553835	high	high	high	high	high	high	high	high	high	high
GAACCGCCCAGTCACCAGCAA	G) Xiang X et al, 2021, (2d)	-21	0.326531	low	high	high	high	high	high	low	high	high	high
GAACCGGCAGAACCGAAGCCG	G) Xiang X et al, 2021, (2d)	-28.8	0.538153	low	low	high	high	high	high	high	high	high	low
GAACCTAGCCAGTTCAGGGCA	G) Xiang X et al, 2021, (2d)	-26	0.458146	low	low	high	high	high	low	high	high	high	high
GAACCTCCAGGGCCGCATCGG	G) Xiang X et al, 2021, (2d)	-25	0.47973	low	low	high	high	high	high	high	high	high	low
GAACCTCCAGGGCCTTGGACC	G) Xiang X et al, 2021, (2d)	-25.3	0.239958	high	high	high	high	high	high	high	high	high	high
GAACCTCCCAGTAATGTTGGC	G) Xiang X et al, 2021, (2d)	-23.9	0.273171	high	high	high	high	high	high	high	high	high	high
GAACCTGCAAAACAACGAGGC	G) Xiang X et al, 2021, (2d)	-21.4	0.360612	high	high	high	high	high	high	high	high	high	high
GAACCTGCAGCCGGAGCTAGC	G) Xiang X et al, 2021, (2d)	-29.9	0.0055325	high	high	high	high	high	high	high	high	high	high
GAACCTGCAGTCCACCTTCTC	G) Xiang X et al, 2021, (2d)	-20.4	0.0732984	low	high	high	high	high	high	low	high	high	high
GAACCTGCCAGAGCATCTCAT	G) Xiang X et al, 2021, (2d)	-23.1	0.168073	low	high	high	high	high	high	low	high	high	high
GAACCTTCCACCCGGGGAGGC	G) Xiang X et al, 2021, (2d)	-25.8	0.123337	low	high	high	high	high	high	high	high	low	high
GAACCTTCCGAGGAATTGGCA	G) Xiang X et al, 2021, (2d)	-26	0.19357	low	high	high	high	high	low	low	high	high	high
GAACCTTGCAGAAGCGAGAGG	G) Xiang X et al, 2021, (2d)	-23.4	0.202346	low	high	high	high	high	high	high	high	low	high
GAACCTTTCGAGTGGCCGTGG	G) Xiang X et al, 2021, (2d)	-29.1	0.288069	high	high	high	high	high	high	high	high	high	high
GAACGCAGGGCCCCAGCTATT	G) Xiang X et al, 2021, (2d)	-30.2	0.164127	low	high	high	high	low	high	low	high	high	high
GAACGCCAGCATCCGGGCAAG	G) Xiang X et al, 2021, (2d)	-24.7	1	high	high	high	high	high	high	high	high	high	high
GAACGCCGAAGAAGGCTGGAT	G) Xiang X et al, 2021, (2d)	-25.8	0.012474	low	high	high	high	high	high	low	high	high	high
GAACGGCCGACAGCTCCGTAC	G) Xiang X et al, 2021, (2d)	-24.9	0.00530504	high	high	high	high	high	high	high	high	high	high
GAACGGCGAACTCGCTCTGCC	G) Xiang X et al, 2021, (2d)	-27.3	0.0954839	high	high	high	high	high	high	high	high	high	high
GAACGGGCAGGCGGGCGGCGG	G) Xiang X et al, 2021, (2d)	-31.4	0.364188	low	high	high	high	high	high	low	low	high	high
GAACGTCCCCAGCCGATGAGG	G) Xiang X et al, 2021, (2d)	-24.1	0.391417	low	high	high	high	high	high	low	high	high	high
GAACGTGCAGCCGGAGGATGA	G) Xiang X et al, 2021, (2d)	-26.4	0.372816	low	high	high	high	high	high	low	high	high	high
GAACTACAGCCGTTCATATTT	G) Xiang X et al, 2021, (2d)	-23.9	0.359807	low	high	high	high	low	high	low	low	high	high
GAACTACCCAGTCGTACGTGC	G) Xiang X et al, 2021, (2d)	-21.5	0.263158	high	high	high	high	high	high	high	high	high	high
GAACTACCGACTACACCAGCT	G) Xiang X et al, 2021, (2d)	-25.6	1	high	high	high	high	high	high	high	high	high	high
GAACTATCGAGTGCCCAGCCG	G) Xiang X et al, 2021, (2d)	-26.7	0.277228	low	high	high	high	high	high	high	high	high	low
GAACTATGCAGGAGAAATTCA	G) Xiang X et al, 2021, (2d)	-20.9	0.459459	low	high	high	high	high	high	low	low	high	high
GAACTCAAGGCTCAGGCTGGT	G) Xiang X et al, 2021, (2d)	-27.9	0.333478	low	high	high	high	high	high	high	high	high	low
GAACTCACAGCCCAACATCAA	G) Xiang X et al, 2021, (2d)	-21.8	0.142857	low	high	high	high	high	high	low	high	high	high
GAACTCAGATATTTTTTTCCT	G) Xiang X et al, 2021, (2d)	-21.9	0.0938198	low	high	high	high	high	high	low	low	high	high
GAACTCAGGGTGAGCAGCTGG	G) Xiang X et al, 2021, (2d)	-28.4	0.278539	low	high	high	high	high	high	high	high	high	low
GAACTCCCAGGAGAAGGCAGT	G) Xiang X et al, 2021, (2d)	-27	0.332143	high	high	high	high	high	high	high	high	high	high
GAACTCGAAAATCAGTAACAG	G) Xiang X et al, 2021, (2d)	-22.1	0.161512	low	low	high	high	high	high	low	low	high	low
GAACTCGATCTGGGGGAGCCA	G) Xiang X et al, 2021, (2d)	-28.5	0.281628	high	high	high	high	high	high	high	high	high	high
GAACTCTCAACTCCAGAGGGC	G) Xiang X et al, 2021, (2d)	-22.8	0.291765	low	low	high	high	high	high	high	high	high	low
GAACTGAACCAGCACCCATAC	G) Xiang X et al, 2021, (2d)	-20	0.550781	low	high	high	high	high	high	low	high	high	high
GAACTGACCAGCAGGGTGGTG	G) Xiang X et al, 2021, (2d)	-25.2	0.519019	low	high	high	high	high	low	high	high	high	high
GAACTGCAGGCCACCTTGGAT	G) Xiang X et al, 2021, (2d)	-22.8	0.414154	low	high	high	high	low	high	low	high	high	high
GAACTGCCAGAAGAGAATGGC	G) Xiang X et al, 2021, (2d)	-24.4	0.616822	low	low	high	high	high	high	low	high	high	low
GAACTGGCCAGGCGGTGGCAG	G) Xiang X et al, 2021, (2d)	-28.9	0.440678	high	high	high	high	high	high	high	high	high	high
GAACTGGGCAGGTGGAGAGTG	G) Xiang X et al, 2021, (2d)	-26.2	0.214868	low	low	high	high	high	low	low	high	high	low
GAACTGTGCAAGGGGGTACTG	G) Xiang X et al, 2021, (2d)	-28.3	0.586408	low	low	high	high	high	high	low	high	high	low
GAACTTCAAGTGTTGGACTTG	G) Xiang X et al, 2021, (2d)	-30.9	0.364126	low	low	high	high	high	high	low	high	high	low
GAACTTCCAGGGGCGCTACGA	G) Xiang X et al, 2021, (2d)	-25.1	0.640678	low	high	high	high	high	high	low	high	high	high
GAACTTCGAAGGCAAATGTGG	G) Xiang X et al, 2021, (2d)	-19.4	0.232082	low	low	high	high	high	high	low	high	high	low
GAACTTGGCAACTTCTTGGCA	G) Xiang X et al, 2021, (2d)	-23.9	0.175	low	high	high	high	high	low	low	high	high	high
GAAGAACACAACGACCAGCTA	G) Xiang X et al, 2021, (2d)	-26.5	0.00286533	low	high	high	high	high	high	low	high	high	high
GAAGAACCAATTATGGCTGGA	G) Xiang X et al, 2021, (2d)	-24.1	0.971429	high	high	high	high	high	high	high	high	high	high
GAAGAACCAGTTTAACAGAGG	G) Xiang X et al, 2021, (2d)	-20.9	0.019774	low	low	high	high	low	high	high	high	high	low
GAAGAAGCAAGAGTTAGCCCG	G) Xiang X et al, 2021, (2d)	-27.5	0.640909	high	high	high	high	high	high	high	high	high	high
GAAGAAGCAAGGATACAGCAC	G) Xiang X et al, 2021, (2d)	-24.7	0.592767	high	high	high	high	high	high	high	high	high	high
GAAGAAGGCAAAAACGTGAAT	G) Xiang X et al, 2021, (2d)	-20.5	0.391705	low	low	high	high	high	high	low	low	high	low
GAAGACAAAAGGAAATTAAAC	G) Xiang X et al, 2021, (2d)	-21.4	0.179811	low	high	high	high	high	high	low	low	high	high
GAAGACAGCAAAACCAAGCAT	G) Xiang X et al, 2021, (2d)	-22.8	0	low	high	high	high	high	high	low	high	high	high
GAAGACAGCCAGAGTTTTGCT	G) Xiang X et al, 2021, (2d)	-28.2	0.126616	low	low	high	high	high	high	low	high	high	high
GAAGACAGGCCTTTCTTTTGG	G) Xiang X et al, 2021, (2d)	-27.7	0.0567458	low	low	high	high	high	high	low	high	high	high
GAAGACCAGGCCTTTGGGGAC	G) Xiang X et al, 2021, (2d)	-26	0.290669	high	high	high	high	high	high	high	high	high	high
GAAGACCCAGAGGATGCTGAG	G) Xiang X et al, 2021, (2d)	-25.8	0.444785	high	high	high	high	high	high	high	high	high	high
GAAGACCGACCATTCTTCCCT	G) Xiang X et al, 2021, (2d)	-25.2	0.193042	low	high	high	high	high	high	low	high	high	high
GAAGACGAGACTACCTGCTTC	G) Xiang X et al, 2021, (2d)	-33.3	0.314667	low	high	high	high	high	high	low	high	high	high
GAAGACGGCCAGTGCTCCTGC	G) Xiang X et al, 2021, (2d)	-28.3	0.208092	high	high	high	high	high	high	high	high	high	high
GAAGACGTCAGGGAGACTTGA	G) Xiang X et al, 2021, (2d)	-25.3	0.292994	low	low	high	high	high	high	low	high	low	low
GAAGACTCGACTTCGAGCCAT	G) Xiang X et al, 2021, (2d)	-31.7	0	low	high	high	high	high	high	low	high	high	high
GAAGACTTCAGGTCAATATCT	G) Xiang X et al, 2021, (2d)	-22.4	0.222374	low	high	high	high	high	high	low	low	high	low
GAAGAGACCAGAGAGATATGC	G) Xiang X et al, 2021, (2d)	-20.9	0.982456	low	high	high	high	high	high	low	high	high	high
GAAGAGCAAAAGCAGGAGATC	G) Xiang X et al, 2021, (2d)	-20.5	0.785467	low	low	high	high	high	high	low	high	high	low
GAAGAGCAACATCACTTGGAA	G) Xiang X et al, 2021, (2d)	-22	0.331461	low	high	high	high	high	high	low	high	high	low
GAAGAGCAGACTATTTACCGC	G) Xiang X et al, 2021, (2d)	-27.1	0.405243	high	high	high	high	high	high	high	high	high	high
GAAGAGCAGCGCGACGTCCAC	G) Xiang X et al, 2021, (2d)	-27.9	0.180168	high	high	high	high	high	high	high	high	high	high
GAAGAGCAGGCAGGGCTGGAA	G) Xiang X et al, 2021, (2d)	-28.7	0.606357	low	high	high	high	high	high	low	high	high	high
GAAGAGCCGATCTCCTCACAA	G) Xiang X et al, 2021, (2d)	-22.3	1	low	high	high	high	high	high	low	high	high	high
GAAGAGCGAGAAGAAGATTTG	G) Xiang X et al, 2021, (2d)	-22.7	0.55144	low	low	high	high	high	high	low	high	high	low
GAAGAGCGAGGAGCAAGGGCA	G) Xiang X et al, 2021, (2d)	-26	0.442605	low	low	high	high	high	low	high	high	high	low
GAAGAGGCAGTCCTCAGCAGA	G) Xiang X et al, 2021, (2d)	-25.3	0.290123	low	high	high	high	high	high	low	high	high	high
GAAGAGGTCCACTTCAGGTGA	G) Xiang X et al, 2021, (2d)	-22.1	0.475504	low	high	high	high	high	high	low	high	high	high
GAAGAGTACCAAATATCAAGG	G) Xiang X et al, 2021, (2d)	-21.4	0.315068	low	high	high	high	high	high	low	low	high	low
GAAGATCCAGGACACAATGGC	G) Xiang X et al, 2021, (2d)	-27.1	0.0174672	low	high	high	high	high	high	low	high	high	high
GAAGATCCGAGCCAATGAGCC	G) Xiang X et al, 2021, (2d)	-24.3	0.384534	high	high	high	high	high	high	high	high	high	high
GAAGATCCGAGTGCACTCGCG	G) Xiang X et al, 2021, (2d)	-25.5	0.334884	low	low	high	high	high	high	high	high	high	low
GAAGATGCAGCAGGTGGAGAA	G) Xiang X et al, 2021, (2d)	-23.6	0.370239	low	low	high	high	high	high	low	high	high	low
GAAGATTCAGCTGCAGGATGC	G) Xiang X et al, 2021, (2d)	-22.5	0.133648	high	high	high	high	high	high	high	high	high	high
GAAGCAAACCAAAATCGAGTA	G) Xiang X et al, 2021, (2d)	-22.3	0.811978	low	low	high	high	high	low	low	low	high	high
GAAGCAAATACCATTTCCATC	G) Xiang X et al, 2021, (2d)	-18.5	0.280224	low	low	high	high	high	high	low	low	high	low
GAAGCAAGCAGGCCGGCCTAA	G) Xiang X et al, 2021, (2d)	-30.3	0.75	low	high	high	high	high	high	low	high	high	high
GAAGCAAGCGCTGAGGGAGGC	G) Xiang X et al, 2021, (2d)	-26.5	0.418251	low	high	high	high	high	high	high	high	high	low
GAAGCAAGCTGTCTTCTTTGT	G) Xiang X et al, 2021, (2d)	-23.7	0.314451	low	high	high	high	low	high	low	high	high	high
GAAGCAAGTACTACTGAAGTC	G) Xiang X et al, 2021, (2d)	-23.5	0.0294118	low	high	high	high	high	high	low	high	high	low
GAAGCAAGTCATCGCTGGGGT	G) Xiang X et al, 2021, (2d)	-23.6	0.2	low	high	high	high	high	high	high	high	high	low
GAAGCACAGCTGGTTGAAGAA	G) Xiang X et al, 2021, (2d)	-23.8	0.593131	low	high	high	high	high	high	low	high	high	high
GAAGCACAGTCTCAGCCCCAT	G) Xiang X et al, 2021, (2d)	-26.2	0.566778	high	high	high	high	high	high	high	high	high	high
GAAGCAGAACCAGCTCGGCGC	G) Xiang X et al, 2021, (2d)	-27.1	0.197545	low	high	high	high	high	high	low	high	high	low
GAAGCAGAACTTACTATCCGT	G) Xiang X et al, 2021, (2d)	-26.6	0.268251	low	high	high	high	high	high	low	high	high	high
GAAGCAGAAGAAGCTGTTTAA	G) Xiang X et al, 2021, (2d)	-22.4	0.331593	low	high	high	high	high	high	low	low	high	high
GAAGCAGAAGGTGTTCCGCCT	G) Xiang X et al, 2021, (2d)	-25.7	0.50356	high	high	high	high	high	high	high	high	high	high
GAAGCAGACCATCCACGAGGA	G) Xiang X et al, 2021, (2d)	-22.4	0.720798	high	high	high	high	high	high	high	high	high	high
GAAGCAGACCCTGAGCTTCAC	G) Xiang X et al, 2021, (2d)	-25.6	0.32252	low	high	high	high	high	high	low	high	high	high
GAAGCAGACGACCTGGGAAGG	G) Xiang X et al, 2021, (2d)	-26	0.267081	high	high	high	high	high	high	high	high	high	high
GAAGCAGATGCCACAGTATCG	G) Xiang X et al, 2021, (2d)	-24.7	0.0169492	low	low	high	high	high	high	low	high	low	low
GAAGCAGATGTCCAGGGTAGC	G) Xiang X et al, 2021, (2d)	-26.4	0.289782	high	high	high	high	high	high	high	high	high	high
GAAGCAGATTGAAGAGCTGAA	G) Xiang X et al, 2021, (2d)	-25.5	0.151316	low	high	high	high	high	high	low	high	high	high
GAAGCAGCCAGACATCACGGA	G) Xiang X et al, 2021, (2d)	-21.9	0.28754	high	high	high	high	high	high	high	high	high	high
GAAGCAGCGGCGGATCAAACT	G) Xiang X et al, 2021, (2d)	-27.4	0.656371	low	high	high	high	high	high	low	high	high	high
GAAGCAGCTGATGGGCCTGGC	G) Xiang X et al, 2021, (2d)	-31	0.33567	high	high	high	high	high	high	high	high	high	high
GAAGCAGCTGCAGAAGAGATT	G) Xiang X et al, 2021, (2d)	-22.4	0.369231	low	high	high	high	low	high	low	high	high	high
GAAGCAGGAGCAGGAGACACA	G) Xiang X et al, 2021, (2d)	-22.1	0.333333	low	high	high	high	high	high	low	high	high	high
GAAGCAGTATGTTCTAAAAGG	G) Xiang X et al, 2021, (2d)	-23.4	0.265823	low	low	high	high	high	high	low	low	high	low
GAAGCCAAGACAGAATGCCTC	G) Xiang X et al, 2021, (2d)	-27.4	0.00606061	high	high	high	high	high	high	high	high	high	high
GAAGCCACAAGAATCCGCACA	G) Xiang X et al, 2021, (2d)	-20.1	0.00649351	high	high	high	high	high	high	high	high	high	high
GAAGCCACAATGTGCTGCTTA	G) Xiang X et al, 2021, (2d)	-27.1	0.0246914	low	high	high	high	high	high	low	high	high	high
GAAGCCACATGCTGAAATGGT	G) Xiang X et al, 2021, (2d)	-23.6	0.176142	low	high	high	high	high	high	low	high	high	high
GAAGCCACTGGAGGTCCTGGC	G) Xiang X et al, 2021, (2d)	-25.9	0.267396	high	high	high	high	high	high	high	high	high	high
GAAGCCAGACAGAGCCCGAGG	G) Xiang X et al, 2021, (2d)	-26.9	0.00862069	high	high	high	high	high	high	high	high	high	high
GAAGCCAGATGCTGAAATGAT	G) Xiang X et al, 2021, (2d)	-22.9	0.209256	low	low	high	high	high	high	low	high	high	high
GAAGCCAGCGGATGGTGGGCG	G) Xiang X et al, 2021, (2d)	-29.8	0.0881743	low	high	high	high	high	low	high	high	high	high
GAAGCCAGGCCTTCCCGGGCT	G) Xiang X et al, 2021, (2d)	-27.3	0.260753	low	low	high	high	high	high	high	high	high	high
GAAGCCAGTACAGCATGGAGC	G) Xiang X et al, 2021, (2d)	-22.3	0.0010929	high	high	high	high	high	high	high	high	high	high
GAAGCCAGTCTGATGGGCAAT	G) Xiang X et al, 2021, (2d)	-25.7	0.31405	low	high	high	high	high	high	low	high	high	high
GAAGCCAGTTAAAAATTTGTA	G) Xiang X et al, 2021, (2d)	-23	0.380414	low	low	high	high	high	high	low	low	high	high
GAAGCCAGTTGCTGAAATGGC	G) Xiang X et al, 2021, (2d)	-26.3	0.252747	low	low	high	high	high	high	low	high	high	high
GAAGCCATGTGTTACTAATCA	G) Xiang X et al, 2021, (2d)	-21.4	0.330518	low	low	high	high	high	high	low	low	high	high
GAAGCCCAGTGTCTACGTCTG	G) Xiang X et al, 2021, (2d)	-24.6	0.195783	high	high	high	high	high	high	high	high	high	high
GAAGCCCCAGAGCAGGGCCAG	G) Xiang X et al, 2021, (2d)	-24.8	0.640756	high	high	high	high	high	high	high	high	high	high
GAAGCCCCAGCAAAAAGCGTT	G) Xiang X et al, 2021, (2d)	-26.8	0.57513	low	high	high	high	high	high	low	high	high	high
GAAGCCCGCAAACCGCTTCCC	G) Xiang X et al, 2021, (2d)	-22.2	0.251318	high	high	high	high	high	high	high	high	high	high
GAAGCCCGCAGCCAGCCCTGC	G) Xiang X et al, 2021, (2d)	-25.9	0.374737	low	low	high	high	high	high	high	high	high	high
GAAGCCGAAAGGTGATTGTTG	G) Xiang X et al, 2021, (2d)	-24	0.508682	low	low	high	high	low	high	low	high	high	high
GAAGCCGAGAACCCAGGCAAC	G) Xiang X et al, 2021, (2d)	-22	0.40678	high	high	high	high	high	high	high	high	high	high
GAAGCCGAGACCAGGAGGCTG	G) Xiang X et al, 2021, (2d)	-29.6	0.161994	low	low	high	high	high	high	high	high	high	high
GAAGCCTGCAGCGCCACAGCC	G) Xiang X et al, 2021, (2d)	-26	0.463215	low	high	high	low	high	high	high	high	high	high
GAAGCGAATCTCTAAGGAGAA	G) Xiang X et al, 2021, (2d)	-23.1	0.704082	low	low	high	high	high	high	low	high	high	low
GAAGCGAGCAGCTGGCTGGCA	G) Xiang X et al, 2021, (2d)	-30.7	0.177281	low	high	high	high	high	low	high	high	high	high
GAAGCGAGGCCTGGAGTGCGA	G) Xiang X et al, 2021, (2d)	-24.9	0.596349	high	high	high	high	high	high	high	high	high	high
GAAGCGATTTTTGGGCCCTTG	G) Xiang X et al, 2021, (2d)	-27.8	0.486166	low	low	high	high	high	high	high	high	high	high
GAAGCGCCAGGCCCAGTCCCC	G) Xiang X et al, 2021, (2d)	-24.8	0.523985	high	high	high	high	high	high	high	high	high	high
GAAGCGCCAGGGCATGACAGG	G) Xiang X et al, 2021, (2d)	-24.9	0.222874	low	high	high	high	high	high	high	high	high	low
GAAGCGCCAGGTGGTGGCAGC	G) Xiang X et al, 2021, (2d)	-27.7	0.0616915	low	high	high	high	high	high	high	high	high	low
GAAGCGCCCAGACCAACCACA	G) Xiang X et al, 2021, (2d)	-22.9	0.787582	low	high	high	high	high	high	low	high	high	high
GAAGCTCAACTTGCATTAATT	G) Xiang X et al, 2021, (2d)	-24	0.706468	low	low	high	high	high	high	low	low	high	low
GAAGCTCGAAGAGTAACTGGT	G) Xiang X et al, 2021, (2d)	-25.2	0.231299	low	high	high	high	high	high	low	high	low	high
GAAGCTCGCGACTCTCCAAGA	G) Xiang X et al, 2021, (2d)	-29	0.153727	low	low	high	high	high	high	low	high	high	low
GAAGCTGCAGGTGAACCAGGA	G) Xiang X et al, 2021, (2d)	-24.2	0.266276	low	low	high	high	high	high	high	high	high	low
GAAGCTGCAGTGTCATGGGCA	G) Xiang X et al, 2021, (2d)	-25.4	0.41038	low	low	high	high	low	low	high	high	high	high
GAAGCTTCAGGAGAAGGATGA	G) Xiang X et al, 2021, (2d)	-25.4	0.0019685	low	low	high	high	high	high	low	high	high	low
GAAGCTTCCAGACCACAGGTC	G) Xiang X et al, 2021, (2d)	-24.5	0.15806	low	low	high	high	high	high	high	high	low	low
GAAGGAAATCTTTACCGCCCT	G) Xiang X et al, 2021, (2d)	-25.4	0.278351	high	high	high	high	high	high	high	high	high	high
GAAGGACAAGGGACCATCTGC	G) Xiang X et al, 2021, (2d)	-28	0.275601	low	high	high	high	high	high	low	high	high	high
GAAGGACCAGGATTCTATTAC	G) Xiang X et al, 2021, (2d)	-22.7	0	low	low	high	high	high	high	low	high	high	high
GAAGGAGCAACTGATCCAGGA	G) Xiang X et al, 2021, (2d)	-23	0.170892	low	high	high	high	high	high	high	high	high	low
GAAGGAGCAGCGGCTGAACTT	G) Xiang X et al, 2021, (2d)	-33.5	0.569811	low	high	high	high	low	high	low	high	high	high
GAAGGAGCAGGAAAACCGGAA	G) Xiang X et al, 2021, (2d)	-23.1	0.332103	high	high	high	high	high	high	high	high	high	high
GAAGGAGCAGTTTGGCCAGGA	G) Xiang X et al, 2021, (2d)	-25.8	0.371515	high	high	high	high	high	high	high	high	high	high
GAAGGAGGCAGGAGCTGGCTC	G) Xiang X et al, 2021, (2d)	-31.1	0.704296	high	high	high	high	high	high	high	high	high	high
GAAGGATGGCTGCGGCCTGCA	G) Xiang X et al, 2021, (2d)	-31.2	0.381948	high	high	high	high	high	high	high	high	high	high
GAAGGCAAACAATAGTTGAGT	G) Xiang X et al, 2021, (2d)	-23.1	0	low	high	high	high	high	high	low	low	high	high
GAAGGCAAGAACTAGCAGTTC	G) Xiang X et al, 2021, (2d)	-26.4	0.339056	low	high	high	high	high	high	low	high	high	high
GAAGGCAAGTGCCAAAGTGCT	G) Xiang X et al, 2021, (2d)	-26.1	0.25621	low	high	high	high	high	high	low	high	high	high
GAAGGCCACAGGATAAGTTTC	G) Xiang X et al, 2021, (2d)	-27.8	0.416523	low	high	high	high	high	high	low	high	high	high
GAAGGCCAGCAGTACAGAAAC	G) Xiang X et al, 2021, (2d)	-20.7	0.188948	low	high	high	high	high	high	low	high	high	high
GAAGGCCAGTACTTTCATAGC	G) Xiang X et al, 2021, (2d)	-24	0.276305	low	high	high	high	high	high	low	high	high	high
GAAGGCCCAAGCCACTAGCAC	G) Xiang X et al, 2021, (2d)	-29.2	0.359944	low	high	high	high	high	high	low	high	high	high
GAAGGCGAAGCCCAGTGCCGC	G) Xiang X et al, 2021, (2d)	-26.7	0.23777	high	high	high	high	high	high	high	high	high	high
GAAGGCGCAGTCCCTGACCAC	G) Xiang X et al, 2021, (2d)	-23.3	0.511076	high	high	high	high	high	high	high	high	high	high
GAAGGCTCCATTGTGGAGGGC	G) Xiang X et al, 2021, (2d)	-25	0.249153	low	high	high	high	high	high	high	high	low	high
GAAGGCTGCGAAAGGAGGGCG	G) Xiang X et al, 2021, (2d)	-25.3	0.51229	low	low	high	high	high	low	high	high	high	low
GAAGGCTTCGACACCTCGGAC	G) Xiang X et al, 2021, (2d)	-24.3	0.164452	high	high	high	high	high	high	high	high	high	high
GAAGGGCAGGAGCGAGCTCCG	G) Xiang X et al, 2021, (2d)	-27.3	0.984694	high	high	high	high	high	high	high	high	high	high
GAAGGGCCAAAAAGGAGACCC	G) Xiang X et al, 2021, (2d)	-22.5	1	high	high	high	high	high	high	high	high	high	high
GAAGGGCCAAGGCGAATACAC	G) Xiang X et al, 2021, (2d)	-23.1	0.31993	low	high	high	high	high	high	low	high	high	high
GAAGGGCCAGGGCGAATACTC	G) Xiang X et al, 2021, (2d)	-25.7	0.292308	low	high	high	high	high	high	low	high	high	high
GAAGGGCCCATGGCCGGCCCT	G) Xiang X et al, 2021, (2d)	-32.3	0.00687285	low	high	high	high	high	high	high	high	low	high
GAAGGGCCGAGACACCGTGCA	G) Xiang X et al, 2021, (2d)	-23.7	0.165652	low	high	high	high	high	high	high	high	high	low
GAAGGGGCAGATCCTGGTTAA	G) Xiang X et al, 2021, (2d)	-26.5	0.208748	low	high	high	high	high	high	low	high	high	high
GAAGGGTCAGCCAGGCATCTG	G) Xiang X et al, 2021, (2d)	-25.7	0.178862	low	low	high	high	high	high	low	high	high	low
GAAGGTCAACCATTCATTCGT	G) Xiang X et al, 2021, (2d)	-20.8	0.398137	low	high	high	high	high	high	low	high	high	high
GAAGGTCAACGAAAGGCATTT	G) Xiang X et al, 2021, (2d)	-27.6	0.232177	low	high	high	high	low	high	low	high	high	high
GAAGGTCCAAGTGGTATTGGA	G) Xiang X et al, 2021, (2d)	-27.6	0.316785	low	high	high	high	high	high	low	high	high	low
GAAGGTCCAGTTTTTACTAGT	G) Xiang X et al, 2021, (2d)	-23.2	0.0885467	low	high	high	high	high	high	low	low	high	high
GAAGGTCGATTTGGAGAAGTT	G) Xiang X et al, 2021, (2d)	-28.8	0.163561	low	high	high	high	high	high	low	high	high	low
GAAGGTGCAAGTCGCTGAAGA	G) Xiang X et al, 2021, (2d)	-21.8	0.419672	low	high	high	high	high	high	low	high	high	high
GAAGGTGCAGAGCCGTCTGGT	G) Xiang X et al, 2021, (2d)	-26.4	0.555556	low	high	high	high	high	high	low	high	high	low
GAAGGTTCAGATGCAAATGGA	G) Xiang X et al, 2021, (2d)	-22.8	0.0027933	low	high	high	high	high	high	low	high	high	low
GAAGTAAGGCTGTCACAAGGC	G) Xiang X et al, 2021, (2d)	-21.9	0.503067	low	low	high	high	high	high	high	high	high	low
GAAGTACCAGCTTAGGAAAAC	G) Xiang X et al, 2021, (2d)	-22.7	0.583127	low	high	high	high	high	high	low	high	high	low
GAAGTACCCAAGGGCCCATTG	G) Xiang X et al, 2021, (2d)	-23.9	0.324924	low	low	high	high	high	high	low	high	high	low
GAAGTCAGACTCGGGCCATTA	G) Xiang X et al, 2021, (2d)	-30.2	0.417983	low	low	high	high	high	high	low	high	high	low
GAAGTCAGCAGAAGAAATTAG	G) Xiang X et al, 2021, (2d)	-19.1	0.235043	low	high	high	high	high	high	low	low	high	high
GAAGTCAGCAGGCCAAGTTTG	G) Xiang X et al, 2021, (2d)	-25	0.294075	low	high	high	high	high	high	low	high	high	high
GAAGTCATCAGCCATTACAGT	G) Xiang X et al, 2021, (2d)	-21.3	0.644737	low	high	high	high	high	high	low	high	high	high
GAAGTCCATCCCATGAGGGGC	G) Xiang X et al, 2021, (2d)	-24.3	0.395265	high	high	high	high	high	high	high	high	high	high
GAAGTCCCAGGCCAAGATGAG	G) Xiang X et al, 2021, (2d)	-21.1	0.249201	low	high	high	high	high	high	low	high	high	high
GAAGTCGAGATGAGGAGACCT	G) Xiang X et al, 2021, (2d)	-28.5	0.477105	low	high	high	high	high	high	low	high	high	low
GAAGTCGCAGATAGAGAAGGA	G) Xiang X et al, 2021, (2d)	-21.7	0.127345	low	low	high	high	high	high	low	high	high	high
GAAGTCTGCAGGTCGTTGATC	G) Xiang X et al, 2021, (2d)	-21.5	0.319588	low	high	high	high	high	high	low	high	low	high
GAAGTGAACAACAGCCACTGA	G) Xiang X et al, 2021, (2d)	-23.3	0.245098	low	high	high	high	high	high	low	high	high	high
GAAGTGAGCAGAGAGTATCCA	G) Xiang X et al, 2021, (2d)	-24.3	0.152209	low	high	high	high	high	high	low	high	high	low
GAAGTGCAAGTAGAGTACAAG	G) Xiang X et al, 2021, (2d)	-22.4	0.682274	low	low	high	high	low	high	low	high	high	low
GAAGTGCAGAGGCTGCAGTCC	G) Xiang X et al, 2021, (2d)	-24.3	0.35124	low	high	high	high	high	high	high	high	low	high
GAAGTGCAGCAGACGGTGTAC	G) Xiang X et al, 2021, (2d)	-24.8	0.183604	low	high	high	high	high	high	low	high	high	low
GAAGTGCAGTATGTCGCCCTG	G) Xiang X et al, 2021, (2d)	-23	0.169797	low	high	high	high	high	high	high	high	high	low
GAAGTGCCACTCATCCCGCTC	G) Xiang X et al, 2021, (2d)	-24.5	0.342301	low	low	high	high	high	high	high	high	high	low
GAAGTGCCCAGCCAGAGCGAC	G) Xiang X et al, 2021, (2d)	-22.8	0.257803	low	high	high	high	high	high	high	high	high	low
GAAGTGCTCAATTGTTTTTTG	G) Xiang X et al, 2021, (2d)	-21.3	0.0759109	low	low	high	high	high	high	low	low	high	low
GAAGTGGCAGGAGCAGTATGA	G) Xiang X et al, 2021, (2d)	-27.4	0.309771	low	high	high	high	high	high	low	high	high	high
GAAGTGGGCAAGATGAGTCTT	G) Xiang X et al, 2021, (2d)	-31.1	0.478341	low	high	low	high	high	high	low	high	high	low
GAAGTGGTCAAAATGAGAGAA	G) Xiang X et al, 2021, (2d)	-23.2	0.0134529	low	low	high	high	low	high	low	low	high	low
GAAGTGTGCCAGGCATAGGTG	G) Xiang X et al, 2021, (2d)	-24.1	0.482422	low	high	high	high	high	low	low	high	high	low
GAAGTTACAACCCCAGCGGTC	G) Xiang X et al, 2021, (2d)	-21.8	0.00290698	low	high	high	low	high	high	high	high	high	high
GAAGTTCAGAGTGAAATCGAA	G) Xiang X et al, 2021, (2d)	-20.6	0.534091	low	low	high	high	high	high	low	low	high	low
GAAGTTCAGCACCAGCAGCAG	G) Xiang X et al, 2021, (2d)	-23.2	1	low	high	high	high	high	high	high	high	high	low
GAAGTTCCACACTTGCTCCAG	G) Xiang X et al, 2021, (2d)	-22.8	0.488512	low	low	high	high	high	high	high	high	high	low
GAATAAACAAGAAAAAAACAG	G) Xiang X et al, 2021, (2d)	-18.4	0.0143885	low	low	high	high	high	high	low	low	high	low
GAATAAATCAATGGAGGAACA	G) Xiang X et al, 2021, (2d)	-23.3	0.592593	low	low	high	high	high	high	low	low	high	high
GAATAACCAGCAGGTGTTCAA	G) Xiang X et al, 2021, (2d)	-23.2	0.361093	low	low	high	high	high	high	low	high	high	low
GAATAACCAGCTCTTCTTCCT	G) Xiang X et al, 2021, (2d)	-23.1	0.340408	low	low	high	high	high	high	low	high	high	low
GAATAACCCACCAAATGGAGC	G) Xiang X et al, 2021, (2d)	-23.1	0.250958	high	high	high	high	high	high	high	high	high	high
GAATAAGTCAATATAGGTTTA	G) Xiang X et al, 2021, (2d)	-25.9	0.304839	low	low	high	high	high	high	low	low	high	low
GAATACACCACTCCTCAAATT	G) Xiang X et al, 2021, (2d)	-20.1	0	low	high	high	high	low	high	low	low	high	high
GAATACAGAACCAAACACTGC	G) Xiang X et al, 2021, (2d)	-19.8	0.50519	high	high	high	high	high	high	high	high	high	high
GAATACAGCTTATGCATAACC	G) Xiang X et al, 2021, (2d)	-20.3	0	low	low	high	high	high	high	low	low	high	low
GAATACCAGGCCACAGCGAAG	G) Xiang X et al, 2021, (2d)	-23.6	0.146252	high	high	high	high	high	high	high	high	high	high
GAATACCCAAAATGGGGATGT	G) Xiang X et al, 2021, (2d)	-24.5	0.468379	low	low	high	high	high	high	low	high	high	high
GAATACCCAAGATGGTCACAA	G) Xiang X et al, 2021, (2d)	-22.4	0.237952	low	low	high	high	low	high	low	high	high	high
GAATAGGCCGAATGATTGCTG	G) Xiang X et al, 2021, (2d)	-23.7	0.314945	low	low	high	high	high	high	low	high	high	high
GAATAGTCCCAGTGACCTTTG	G) Xiang X et al, 2021, (2d)	-21.6	0.216473	low	low	high	high	high	high	low	high	high	high
GAATATCAAAAATCTGTTGGG	G) Xiang X et al, 2021, (2d)	-22	0.257485	low	low	high	high	high	high	high	low	high	low
GAATATGACCATGCCAGCCCA	G) Xiang X et al, 2021, (2d)	-28	0.0822917	high	high	high	high	high	high	high	high	high	high
GAATATTACAATCAACTCTTA	G) Xiang X et al, 2021, (2d)	-19.3	0	low	high	high	high	high	high	low	low	high	high
GAATCAAATGACTGCCGATCC	G) Xiang X et al, 2021, (2d)	-26.1	0.684211	high	high	high	high	high	high	high	high	high	high
GAATCAACATGTAAAACAAAA	G) Xiang X et al, 2021, (2d)	-20.4	0	low	low	high	high	high	high	low	low	high	low
GAATCAAGAAACCAGTAATAG	G) Xiang X et al, 2021, (2d)	-21.9	0.256831	low	low	high	high	high	high	low	low	high	low
GAATCAAGCAGCACCTGCATT	G) Xiang X et al, 2021, (2d)	-24.9	0.316098	low	high	high	high	low	high	low	high	high	high
GAATCAAGCAGCACGAAGGCC	G) Xiang X et al, 2021, (2d)	-26	0.16447	low	high	high	low	high	high	high	high	high	low
GAATCAAGGCAGGCACTTCTG	G) Xiang X et al, 2021, (2d)	-24.4	0.237728	low	high	high	high	high	high	low	high	high	low
GAATCAAGTTCTTGATGAAAT	G) Xiang X et al, 2021, (2d)	-25.5	0.253724	low	low	high	high	low	high	low	low	high	low
GAATCAGATAAGCAGCCTCCA	G) Xiang X et al, 2021, (2d)	-28.2	1	high	high	high	high	high	high	high	high	high	high
GAATCAGCAAAACCACTATGA	G) Xiang X et al, 2021, (2d)	-19.9	1	low	low	high	high	high	high	low	low	high	low
GAATCAGCTTCAGACAAGTCT	G) Xiang X et al, 2021, (2d)	-27	0.00510204	low	high	high	high	high	high	low	high	high	high
GAATCAGGCTGCAGATTATTT	G) Xiang X et al, 2021, (2d)	-25.2	0.224838	low	high	high	high	low	high	low	low	high	low
GAATCAGGGCTCCTCCCTGTT	G) Xiang X et al, 2021, (2d)	-27.4	0.0843661	low	high	high	high	high	high	low	high	high	high
GAATCAGGTATGTCAATCTTC	G) Xiang X et al, 2021, (2d)	-21.9	0.68018	low	high	high	high	high	high	low	low	high	low
GAATCAGTACAAAGCCACAAT	G) Xiang X et al, 2021, (2d)	-23	0	low	high	high	high	high	high	low	low	high	high
GAATCAGTGGGCTGTGGATTC	G) Xiang X et al, 2021, (2d)	-25	0.150526	low	high	high	high	high	high	low	high	high	high
GAATCATCCATAGCATGATGA	G) Xiang X et al, 2021, (2d)	-22	0.433988	low	low	high	high	low	high	low	low	high	high
GAATCCAGAGAGGAAACACTA	G) Xiang X et al, 2021, (2d)	-24.5	0.45975	low	low	high	high	low	high	low	high	high	high
GAATCCAGAGAGTGGCTGAAG	G) Xiang X et al, 2021, (2d)	-27.1	0.145506	low	high	high	high	high	high	low	high	high	high
GAATCCAGGAGCCGGTGTGGC	G) Xiang X et al, 2021, (2d)	-26.6	0.170352	high	high	high	high	high	high	high	high	high	high
GAATCCAGGATCGAGGAGACC	G) Xiang X et al, 2021, (2d)	-23.2	0.655542	high	high	high	high	high	high	high	high	high	high
GAATCCAGGATGAAGAACGAA	G) Xiang X et al, 2021, (2d)	-23.7	0.957895	low	low	high	high	low	high	low	high	high	low
GAATCCAGGCATCCACCCAGG	G) Xiang X et al, 2021, (2d)	-22.4	0.829684	low	low	high	high	high	high	high	high	high	low
GAATCCAGGCCAGGTCGTGCT	G) Xiang X et al, 2021, (2d)	-24.7	0	high	high	high	high	high	high	high	high	high	high
GAATCCAGTAAAATTGTTGAC	G) Xiang X et al, 2021, (2d)	-19	0.29734	low	low	high	high	high	high	low	low	high	high
GAATCCAGTCCCACGGGCTGC	G) Xiang X et al, 2021, (2d)	-29.3	0.354809	high	high	high	high	high	high	high	high	high	high
GAATCCATATGGAGGTGTGGA	G) Xiang X et al, 2021, (2d)	-25.1	0.290957	low	high	high	high	high	high	low	high	low	high
GAATCCATGAGGCTGAGTCTG	G) Xiang X et al, 2021, (2d)	-29.5	0.340818	low	high	high	high	high	high	low	high	high	high
GAATCCATGTGGTTTGCACAG	G) Xiang X et al, 2021, (2d)	-23.4	0.130435	low	low	high	high	high	high	high	high	high	low
GAATCCCAAGTCTCGTACCAA	G) Xiang X et al, 2021, (2d)	-20.2	0.429418	low	high	high	high	high	high	low	high	high	low
GAATCCCACAGAAAACTGATG	G) Xiang X et al, 2021, (2d)	-22.1	0	low	low	high	high	low	high	low	high	high	high
GAATCCCACAGGTTCCCGGCC	G) Xiang X et al, 2021, (2d)	-25.3	0.232398	low	high	high	high	high	high	low	high	high	high
GAATCCCGAGACATCTTTGGG	G) Xiang X et al, 2021, (2d)	-26.7	0.306502	low	low	high	high	high	high	low	high	low	low
GAATCCTCAGGATTTTAAGCC	G) Xiang X et al, 2021, (2d)	-27.6	0.260472	low	high	high	high	high	high	low	high	high	high
GAATCGAAACGCCATCCACCC	G) Xiang X et al, 2021, (2d)	-20.6	1	high	high	high	high	high	high	high	high	high	high
GAATCGATTCCATATGATGAA	G) Xiang X et al, 2021, (2d)	-19.6	0.352034	low	low	high	high	high	high	low	low	high	high
GAATCGATTTCTGGATGACCA	G) Xiang X et al, 2021, (2d)	-25.7	0.412965	low	high	high	high	high	high	low	high	high	high
GAATCGCCCACCGTAGCACAT	G) Xiang X et al, 2021, (2d)	-23.6	0.177919	low	high	high	high	high	high	low	high	high	high
GAATCGGGCCACCTGTTCTTA	G) Xiang X et al, 2021, (2d)	-26.9	0.400435	low	low	high	high	high	high	low	high	high	low
GAATCTACAACCCCATGATGC	G) Xiang X et al, 2021, (2d)	-19.5	0.268587	low	low	high	high	high	high	low	high	high	low
GAATGAGCCAAGGGCTGCAGA	G) Xiang X et al, 2021, (2d)	-29.5	0.894502	low	high	high	high	high	high	low	high	high	high
GAATGATCCAGCAGTTGGTGG	G) Xiang X et al, 2021, (2d)	-24.2	0.0608175	low	low	high	high	high	high	high	high	high	low
GAATGATGGGACAGAATTTGG	G) Xiang X et al, 2021, (2d)	-26.3	0.0935484	low	high	high	high	high	high	low	high	high	high
GAATGCAGACTTTGCTTTCCT	G) Xiang X et al, 2021, (2d)	-27.3	0.38663	low	high	high	high	low	high	low	high	high	high
GAATGCAGCTGCTGTACTACC	G) Xiang X et al, 2021, (2d)	-22.8	0.413969	low	high	high	high	high	high	low	high	low	high
GAATGCAGTTATCACCTGCTG	G) Xiang X et al, 2021, (2d)	-23.3	0.289492	low	low	high	high	low	high	high	high	high	low
GAATGCCACAAGAACTAATTG	G) Xiang X et al, 2021, (2d)	-21.9	1	low	low	high	high	low	high	low	low	high	high
GAATGCCACTCCCCAATGCCA	G) Xiang X et al, 2021, (2d)	-22.1	0.46468	low	high	high	high	high	high	low	high	high	high
GAATGCCAGCTCTGCTTGGCC	G) Xiang X et al, 2021, (2d)	-24.8	0.242445	high	high	high	high	high	high	high	high	high	high
GAATGCCCAGAATGTCTGCTT	G) Xiang X et al, 2021, (2d)	-24	0.254122	low	high	high	high	high	high	low	high	low	high
GAATGCCCAGCCAGCTTTGGA	G) Xiang X et al, 2021, (2d)	-23.6	0.15756	low	high	high	high	high	high	low	high	high	high
GAATGCCCAGGGGCAGGGTAA	G) Xiang X et al, 2021, (2d)	-25.3	0.36794	low	high	high	high	high	high	low	high	high	high
GAATGCCCAGGTCAAAGCAGA	G) Xiang X et al, 2021, (2d)	-23.1	0.0939511	low	high	high	high	high	high	low	high	high	high
GAATGCGAGTTAACGTGGACA	G) Xiang X et al, 2021, (2d)	-28.1	0.05	low	low	high	high	high	high	low	high	high	low
GAATGCTGCGATCTTCTGCCA	G) Xiang X et al, 2021, (2d)	-24.7	0.17491	high	high	high	high	high	high	high	high	high	high
GAATGGACAAGATCCCGTTAA	G) Xiang X et al, 2021, (2d)	-26.8	0.313679	low	high	high	high	high	high	low	high	high	high
GAATGGACAGTCATTAACCAA	G) Xiang X et al, 2021, (2d)	-27.6	0.402108	low	high	high	high	low	high	low	low	high	high
GAATGGCAGGAGCGTCAGGCC	G) Xiang X et al, 2021, (2d)	-27.3	0.334369	low	high	high	low	high	high	high	high	high	high
GAATGGCCACCACCTTTCTTT	G) Xiang X et al, 2021, (2d)	-25.1	0.264281	low	high	low	high	low	high	low	high	high	high
GAATGGCCAGATGGTGACAGA	G) Xiang X et al, 2021, (2d)	-23.2	0.37013	low	high	high	high	high	high	low	high	high	high
GAATGGGGCAAAGCGTGCTCC	G) Xiang X et al, 2021, (2d)	-28.9	0.923077	low	low	high	high	high	high	high	high	low	low
GAATGGTCAGATTGATGTACC	G) Xiang X et al, 2021, (2d)	-23.9	0.256818	low	low	high	high	high	high	low	high	high	low
GAATGTACAACCTTTAAGGCA	G) Xiang X et al, 2021, (2d)	-20.6	0.764706	low	high	high	high	low	low	low	low	high	high
GAATGTACCAAAAGCAAATAT	G) Xiang X et al, 2021, (2d)	-20.7	0.342936	low	high	high	high	high	high	low	low	high	high
GAATGTGCAATACTGGAAAAA	G) Xiang X et al, 2021, (2d)	-21.7	0.443609	low	high	high	high	high	high	low	low	high	high
GAATGTGCCCAATCTGATGAC	G) Xiang X et al, 2021, (2d)	-23.8	0.319749	low	low	high	high	high	high	low	high	high	low
GAATGTGCGAAAAGAGGAGCT	G) Xiang X et al, 2021, (2d)	-23.4	0.128171	high	high	high	high	high	high	high	high	high	high
GAATGTTCAGAAAGAAGGACA	G) Xiang X et al, 2021, (2d)	-24.4	0.246725	low	low	high	high	high	high	low	low	high	high
GAATGTTCAGTTCATCAATGT	G) Xiang X et al, 2021, (2d)	-20.6	0.411538	low	low	high	high	high	high	low	low	high	low
GAATGTTCAGTTTGACCACTA	G) Xiang X et al, 2021, (2d)	-26.1	0.336074	low	low	high	high	low	high	low	low	high	low
GAATTAACCACAGCTGGGTAC	G) Xiang X et al, 2021, (2d)	-24.7	0.149267	high	high	high	high	high	high	high	high	high	high
GAATTCAAGATTTCTTGTGGA	G) Xiang X et al, 2021, (2d)	-22.6	0.172225	low	low	high	high	high	high	low	low	high	low
GAATTCAGAACATCCACTTTG	G) Xiang X et al, 2021, (2d)	-19.7	0.238095	low	low	high	high	high	high	low	low	high	low
GAATTCAGAGTTTTGAACAGG	G) Xiang X et al, 2021, (2d)	-23.3	0.170688	low	low	high	high	high	high	low	low	high	low
GAATTCAGGACCTGCTGGAAA	G) Xiang X et al, 2021, (2d)	-27.4	0.777302	low	high	high	high	high	high	low	high	high	high
GAATTCCAGCCCAGCGCTGGC	G) Xiang X et al, 2021, (2d)	-25.6	0.374781	low	low	high	high	high	high	high	high	high	low
GAATTCCCAGGCATCTATATC	G) Xiang X et al, 2021, (2d)	-22.4	0.301303	low	low	high	high	high	high	low	high	high	low
GAATTCGACAAGAGATTGAGA	G) Xiang X et al, 2021, (2d)	-20.9	0.314356	low	low	high	high	high	high	low	low	high	low
GAATTCGAGGCCGGGCAGCCC	G) Xiang X et al, 2021, (2d)	-33.9	0.510566	low	high	high	high	high	high	high	high	high	low
GAATTCTCAGGGAAACCGTTT	G) Xiang X et al, 2021, (2d)	-24.9	0.10551	low	high	high	high	high	high	low	high	high	high
GAATTGCTCAGCTGAAGAATA	G) Xiang X et al, 2021, (2d)	-22.2	0.310275	low	low	high	high	high	high	low	low	high	low
GAATTGTCCAGAAATGCCTAC	G) Xiang X et al, 2021, (2d)	-24.4	0.344988	high	high	high	high	high	high	high	high	high	high
GAATTTCAGAGGGGCTCCGAG	G) Xiang X et al, 2021, (2d)	-28.1	0.346667	high	high	high	high	high	high	high	high	high	high
GAATTTCCCAGAAACATGTGG	G) Xiang X et al, 2021, (2d)	-22.3	0.254902	low	low	high	high	high	high	low	high	high	low
GAATTTTTCCAATGCCTTCCA	G) Xiang X et al, 2021, (2d)	-23.9	0.115429	low	high	high	high	high	high	low	low	high	high
GAATTTTTGAGGGAATTGCCA	G) Xiang X et al, 2021, (2d)	-29.3	0.252953	low	high	high	high	high	high	low	low	high	high
GACAAACAGTTCTCCCTGAAC	G) Xiang X et al, 2021, (2d)	-21.9	0.228598	low	low	high	high	high	high	low	high	high	low
GACAAACCACTGACAAAAGGC	G) Xiang X et al, 2021, (2d)	-21.7	0.106719	low	high	high	high	high	high	low	high	high	high
GACAAACCGAATTGGCATGAT	G) Xiang X et al, 2021, (2d)	-25.8	0.348983	low	high	high	high	high	high	low	high	high	high
GACAAAGCCAGACAGAGCCCG	G) Xiang X et al, 2021, (2d)	-27.8	0.23951	high	high	high	high	high	high	high	high	high	high
GACAACAAGCTTCAGTTCTAC	G) Xiang X et al, 2021, (2d)	-24.1	1	low	low	high	high	high	high	low	high	high	low
GACAACAAGTAAATCCCACAA	G) Xiang X et al, 2021, (2d)	-19.5	0.391304	low	low	high	high	high	high	low	low	high	low
GACAACACAACCTACAGCCTC	G) Xiang X et al, 2021, (2d)	-28.2	0.5	high	high	high	high	high	high	high	high	high	high
GACAACACCAGTATGAGATCC	G) Xiang X et al, 2021, (2d)	-19.6	0.274306	low	high	high	high	high	high	low	high	high	high
GACAACAGCCACTGATGGGCT	G) Xiang X et al, 2021, (2d)	-27.8	1	low	low	high	high	low	high	high	high	high	high
GACAACAGGATCTACCACTTT	G) Xiang X et al, 2021, (2d)	-30.2	0.56	low	high	low	high	low	high	low	high	high	high
GACAACCAATTCAGAAGTCCC	G) Xiang X et al, 2021, (2d)	-22.3	0.304989	high	high	high	high	high	high	high	high	high	high
GACAACCAGAAGAGTGACATC	G) Xiang X et al, 2021, (2d)	-21.3	0.712687	low	high	high	high	high	high	low	high	high	high
GACAACCAGACTGAAGAGAGG	G) Xiang X et al, 2021, (2d)	-23.1	0.177215	high	high	high	high	high	high	high	high	high	high
GACAACCAGACTGTCTTCTAC	G) Xiang X et al, 2021, (2d)	-27.6	0.191719	low	high	high	high	low	high	low	high	high	high
GACAACCAGATGAAAGGAATG	G) Xiang X et al, 2021, (2d)	-27	0.3	low	low	high	high	high	high	low	high	high	high
GACAACCTCAAATCCTCCTGT	G) Xiang X et al, 2021, (2d)	-21.4	0.0162602	low	high	high	high	low	high	low	high	high	high
GACAACTGCAAGAAGAGGATC	G) Xiang X et al, 2021, (2d)	-21.1	0.322034	low	low	high	high	high	high	low	high	high	low
GACAAGCAGGGCTTCGGCAGT	G) Xiang X et al, 2021, (2d)	-31	0.395315	high	high	high	high	high	high	high	high	high	high
GACAAGCCCAAGCCCACGACC	G) Xiang X et al, 2021, (2d)	-23.6	0.0121951	high	high	high	high	high	high	high	high	high	high
GACAAGCGAACTGACTACCGG	G) Xiang X et al, 2021, (2d)	-29.5	0.460768	low	high	high	high	high	high	high	high	high	low
GACAAGCTCAGAAGCGAACTC	G) Xiang X et al, 2021, (2d)	-28.4	0.0114943	low	low	high	high	high	high	low	high	high	low
GACAAGTTCAGCCCAAGAAAA	G) Xiang X et al, 2021, (2d)	-21.2	0	low	high	high	high	high	high	low	high	high	low
GACAATCAACAGACTTTGAAG	G) Xiang X et al, 2021, (2d)	-24.1	0.361765	low	high	high	high	high	high	low	low	high	high
GACAATCCCGAAGAGATGACT	G) Xiang X et al, 2021, (2d)	-22.5	0.419512	low	high	high	high	high	high	low	high	high	high
GACACAAAACATGGAACGATT	G) Xiang X et al, 2021, (2d)	-24.4	0.986111	low	high	high	high	low	high	low	low	high	high
GACACAAGGCTCGGTGCTCTT	G) Xiang X et al, 2021, (2d)	-34.3	0.481063	low	high	low	high	high	high	low	high	high	low
GACACAAGGGTCCTTCCACTG	G) Xiang X et al, 2021, (2d)	-23.9	0.32987	low	low	high	high	high	high	high	high	high	high
GACACAATTAAACCAACTCCT	G) Xiang X et al, 2021, (2d)	-22.6	1	low	high	high	high	high	high	low	low	high	high
GACACACAGATGCTGCGGGTG	G) Xiang X et al, 2021, (2d)	-27.3	0.138846	low	low	high	high	low	low	high	high	high	high
GACACAGAAGGAATTCTTTCA	G) Xiang X et al, 2021, (2d)	-21.5	0.447309	low	high	high	high	high	high	low	low	high	high
GACACAGCAGGTTGTCTTGGA	G) Xiang X et al, 2021, (2d)	-26.6	0.211552	low	high	high	high	high	high	low	high	high	low
GACACAGCCAAAGAAAATTCG	G) Xiang X et al, 2021, (2d)	-22.6	0.532258	low	high	high	high	high	high	low	high	high	high
GACACAGCCCATACCACCTCC	G) Xiang X et al, 2021, (2d)	-21.8	0	high	high	high	high	high	high	high	high	high	high
GACACAGCGTTGCCGGGACCA	G) Xiang X et al, 2021, (2d)	-27.2	0.314476	low	low	high	high	high	high	high	high	high	low
GACACAGGAGGGGGATGGCAA	G) Xiang X et al, 2021, (2d)	-27	0.143713	low	low	high	high	low	high	low	high	high	low
GACACAGGCCTGGCGGGTGGG	G) Xiang X et al, 2021, (2d)	-26.9	0.0227273	high	high	high	high	high	high	high	high	high	high
GACACAGTGCCCTTATATCCC	G) Xiang X et al, 2021, (2d)	-19.8	0.104149	low	low	high	high	low	high	low	high	high	high
GACACATCCAGATGGACAGCA	G) Xiang X et al, 2021, (2d)	-30.5	0.2	low	high	high	high	high	low	low	high	high	high
GACACATCCCACCACGGCTTC	G) Xiang X et al, 2021, (2d)	-23.8	1	high	high	high	high	high	high	high	high	high	high
GACACATGTAGTTGTAGTGGA	G) Xiang X et al, 2021, (2d)	-23.8	0.294638	low	high	high	high	high	high	low	high	high	low
GACACCACAGGTCAGCAGCTC	G) Xiang X et al, 2021, (2d)	-25.4	0.125186	low	low	high	high	high	high	high	high	high	low
GACACCACTCCATGCCGTTGC	G) Xiang X et al, 2021, (2d)	-25.5	0.433518	low	high	high	high	high	high	high	high	high	low
GACACCAGAATTTCGAAGATT	G) Xiang X et al, 2021, (2d)	-19.8	0.00776197	low	high	high	high	high	high	low	low	high	high
GACACCAGCCTGTTGCCGTCC	G) Xiang X et al, 2021, (2d)	-23.5	0.515801	high	high	high	high	high	high	high	high	high	high
GACACCAGGCGGGGAGCGTGG	G) Xiang X et al, 2021, (2d)	-29.6	0.117647	high	high	high	high	high	high	high	high	high	high
GACACCAGGTCACGGTGCTGG	G) Xiang X et al, 2021, (2d)	-28.9	0.413968	high	high	high	high	high	high	high	high	high	high
GACACCCAAGGGTCCAGGATC	G) Xiang X et al, 2021, (2d)	-23	0.338481	low	low	high	high	high	high	low	high	high	high
GACACCCAGCCCCGCTGCTGT	G) Xiang X et al, 2021, (2d)	-24.8	0.364086	low	high	high	high	high	high	low	high	high	high
GACACCCAGGGGTCCAGGATC	G) Xiang X et al, 2021, (2d)	-23	0.25941	low	low	high	high	high	high	low	high	high	high
GACACCCCCAGGAGGAATCTG	G) Xiang X et al, 2021, (2d)	-23.7	0	low	low	high	high	high	high	low	high	high	high
GACACCTCAGGGACCTTCCAT	G) Xiang X et al, 2021, (2d)	-27.8	0.385338	low	high	high	high	high	high	low	high	high	high
GACACCTGCAGCCTAACCTGG	G) Xiang X et al, 2021, (2d)	-23.7	0.161503	high	high	high	high	high	high	high	high	high	high
GACACGAATACACAGTGTAAC	G) Xiang X et al, 2021, (2d)	-20.5	0.431312	low	high	high	high	high	high	low	high	high	high
GACACGAGCCAGTACAAGGGT	G) Xiang X et al, 2021, (2d)	-23.1	0.510178	low	high	high	high	high	high	low	high	high	high
GACACGAGGAGCGGGTGCTGG	G) Xiang X et al, 2021, (2d)	-29.6	0.643377	high	high	high	high	high	high	high	high	high	high
GACACGCAGCCGCAGGCCGAG	G) Xiang X et al, 2021, (2d)	-25.9	0.582192	high	high	high	high	high	high	high	high	high	high
GACACGGCAGATGCTGCAAAA	G) Xiang X et al, 2021, (2d)	-24.7	0.79198	low	high	high	high	high	high	low	high	high	high
GACACTACAGCACTTTATTGA	G) Xiang X et al, 2021, (2d)	-22.9	0.087822	low	low	high	high	high	high	low	low	high	low
GACACTACAGGAGGGGATCAC	G) Xiang X et al, 2021, (2d)	-23.3	0.228101	low	low	high	high	high	high	low	high	high	low
GACACTAGCCAGGCAGCCCGG	G) Xiang X et al, 2021, (2d)	-27.9	0.485632	low	high	high	high	high	high	low	high	high	high
GACACTCAGATCCATGCATGC	G) Xiang X et al, 2021, (2d)	-19.5	0	high	high	high	high	high	high	high	high	high	high
GACACTCCAGGCCCTACTGAG	G) Xiang X et al, 2021, (2d)	-22.1	0.280423	low	low	high	high	high	high	low	high	high	low
GACACTGCAGTCATTAGCCTG	G) Xiang X et al, 2021, (2d)	-32	0.0175439	high	high	high	high	high	high	high	high	high	high
GACACTGGCAGTTCGGCCAGC	G) Xiang X et al, 2021, (2d)	-27.7	0.390572	low	low	high	high	high	high	high	high	high	low
GACAGAAACAATTTAGCACAC	G) Xiang X et al, 2021, (2d)	-24.1	0	low	high	high	high	high	high	high	low	high	high
GACAGACCACAGGGGCTGAGG	G) Xiang X et al, 2021, (2d)	-25.1	0.25	high	high	high	high	high	high	high	high	high	high
GACAGACCACATCACGACCGC	G) Xiang X et al, 2021, (2d)	-21.5	0.301176	high	high	high	high	high	high	high	high	high	high
GACAGACCCAGATCTGTGAGC	G) Xiang X et al, 2021, (2d)	-23.8	0.310559	high	high	high	high	high	high	high	high	high	high
GACAGACCCAGCTAGATTCTG	G) Xiang X et al, 2021, (2d)	-26	0.374686	low	low	high	high	high	high	low	high	high	high
GACAGACCGAATATGGGGACT	G) Xiang X et al, 2021, (2d)	-25.6	0.325888	low	low	high	high	high	high	high	high	high	high
GACAGCAAATACATCCTACGA	G) Xiang X et al, 2021, (2d)	-20.6	0.686813	low	high	high	high	high	high	low	high	high	high
GACAGCACCCATGCCAGCAGC	G) Xiang X et al, 2021, (2d)	-22.4	0.00387597	high	high	high	high	high	high	high	high	high	high
GACAGCAGAGGAAGATTCTTC	G) Xiang X et al, 2021, (2d)	-25.3	0.162518	low	high	high	high	high	high	low	high	low	high
GACAGCAGATGGACACACCTA	G) Xiang X et al, 2021, (2d)	-31.2	0.325318	low	high	high	high	high	high	low	high	high	high
GACAGCAGCAGCTGGAGGTGC	G) Xiang X et al, 2021, (2d)	-25.2	0.112994	high	high	high	high	high	high	high	high	high	high
GACAGCAGCCAGAGAGCCCGA	G) Xiang X et al, 2021, (2d)	-23.8	0.294643	low	low	high	high	high	high	high	high	high	low
GACAGCAGCCGCAAGTGGTAG	G) Xiang X et al, 2021, (2d)	-24.2	0.251416	low	high	high	high	high	high	low	high	high	high
GACAGCAGCGTAAACGTGATA	G) Xiang X et al, 2021, (2d)	-23.3	0.24924	low	low	high	high	low	high	low	high	high	high
GACAGCAGCTACCCGACAACC	G) Xiang X et al, 2021, (2d)	-22.4	0.00302115	low	high	high	high	high	high	low	high	high	high
GACAGCAGTATGGCAGCCATG	G) Xiang X et al, 2021, (2d)	-27.2	0.205584	high	high	high	high	high	high	high	high	high	high
GACAGCAGTTCTGTGATGACC	G) Xiang X et al, 2021, (2d)	-23.3	0.324016	low	low	high	high	high	high	low	high	high	low
GACAGCATCGACTGCACGTTG	G) Xiang X et al, 2021, (2d)	-26	0.343811	low	high	high	high	high	high	low	high	high	high
GACAGCCAACTCTGCTGTGGG	G) Xiang X et al, 2021, (2d)	-28.5	0.0778589	low	low	high	high	high	high	high	high	high	high
GACAGCCAGGACGCGATGGGG	G) Xiang X et al, 2021, (2d)	-26.9	0.34879	low	low	high	high	high	high	high	high	high	high
GACAGCCAGGAGCTTCGCATG	G) Xiang X et al, 2021, (2d)	-26.1	0.993631	low	low	high	high	high	high	high	high	high	high
GACAGCCAGGCCCTGATCAGC	G) Xiang X et al, 2021, (2d)	-25.4	0.0954064	low	high	high	high	high	high	low	high	high	high
GACAGCCAGTTGCAGTTCACC	G) Xiang X et al, 2021, (2d)	-23.8	0.239094	low	low	high	high	high	high	low	high	high	high
GACAGCCATTTCAAAAAAGCT	G) Xiang X et al, 2021, (2d)	-25.8	0.306796	low	low	high	high	high	high	low	low	high	high
GACAGCCCACCAAAATGCATC	G) Xiang X et al, 2021, (2d)	-23	0	low	high	high	high	high	high	low	high	high	high
[truncated: 34,262 more rows]
