# Supplementary material for: Structure-optimized sgRNA selection with PlatinumCRISPr for efficient Cas9 generation of knockouts
Source: HighWire-hosted journal article supplement (doi:10.1101/gr.279479.124), 2024-12-01
Supplement: Supplemental_Table_S1.xlsx [file Supplemental_Table_S1.xlsx]

## Sheet: S1A
Supplemental Table S1A: Sequence, GC content and cleavage efficiency of sgRNA designed in this study
#	sgRNA Target Sequence	GC (%)	Efficiency (%)
R3G	gggAAATAATGTAGTGTAAAATA	0.3	0.95
L7GC	gggCTGATTACATAATGATGCGA	0.4	0.9
L11GC	GGAGGGAAAGATGGGGGA	0.611111	0.05
R13GC	GGGTGGACGAGGAGGGCA	0.722222	0.05
R13G	ggGAGGGAGGTGGTGTGAGAGG	0.65	0.05
R13C	ggGACCCACCTCCTCTCACACC	0.65	0.95
R13CL	ggGACCCACCTCCTCTGAGAGG	0.65	0.5
R13CR	ggGAGGGAGGTGGTGTCACACC	0.65	0.5
L10ds6G	gggGUUGAUAAAAGUGUAAAAGG	0.466667	0.95
R10ds6GC	gggAAAUCUGUAUGAUUAGCCUU	0.571429	0.05
	cDNA
R3G	CCCTTTATTACATCACATTTTAT
L7GC	CCCGACTAATGTATTACTACGCT
L11GC	CCTCCCTTTCTACCCCCT
R13GC	CCCACCTGCTCCTCCCGT
R13G	CCCTCCCTCCACCACACTCTCC
R13C	CCCTGGGTGGAGGAGAGTGTGG
R13CL	CCCTGGGTGGAGGAGACTCTCC
R13CR	CCCTCCCTCCACCACAGTGTGG
L10ds6G	CCCCAACTATTTTCACATTTTCC
R10ds6GC	CCCTTTAGACATACTAATCGGAA

## Sheet: S1B
Supplemental Table S1B: First sgRNA used for CG6422 (YTHDF)
#	sgRNA Target Sequence	GC (%)	Efficiency (%)
CG6422 5’	GGAGAAGUCAGAACUCAAGU	0.529412	0
CG6422 3’	GAGGCAGAAACAAUGGAUCU	0.529412	0
	cDNA
CG6422 5’	CCTCTTCAGTCTTGAGTTCA
CG6422 3’	CTCCGTCTTTGTTACCTAGA

## Sheet: S1C
Supplemental Table S1C: Sequence, GC content and cleavage efficiency of sgRNA designed in Ren et al., 2014
#	sgRNA Target Sequence	GC (%)	? (MS)	Heritable Mutation Rate (%)a
1	GCACCATGGCTTGGAAAATC	0.5	17	0.118
2	CACCTATGCCTGGCACAATA	0.5	17	0.424
3	CCGTTAGGGAGCCGATAAAG	0.55	17	0.445
4	TTCGGGCAGGCCAAAAACTA	0.5	17	0.504
5	GGCACAATATGGACATCTTT	0.4	17	0.521
6	CAGCAGGATGACCTCTTTAT	0.45	17	0.604
7	CTGCAACGAGCGACACATAC	0.55	33	0.234
8	TTCTTGAGCAAATGTTTCCT	0.35	33	0.36
9	GCACAATATGGACATCTTTG	0.4	33	0.437
10	TTCGCAGAGCTGCATTAACC	0.5	33	0.535
11	TCGCAGAGCTGCATTAACCA	0.5	33	0.588
12	CGCCGGAGGACTCCGGTTCA	0.7	50	0.181
13	TAGTTGGCCGCTCCCTGAAC	0.6	50	0.323
14	CTGCGGCGATCGAAAGGCAA	0.6	50	0.571
15	GCTGCATTAACCAGGGCTTC	0.55	67	0.641
16	CCCAGTCCGCCGGAGGACTC	0.75	67	0.723
17	TTTTGGCCTGCCCGAAGCCC	0.65	67	0.735
18	CCAAAAACTACGGCACGCTC	0.55	67	0.786
19	CAATATGGACATCTTTGGGG	0.45	67	0.816
20	CAGGAGCTATTAATTCGCGG	0.5	83	0.618
21	GCTCCGGCCACCCAGTCCGC	0.8	83	0.636
22	TTATCGGCTCCCTAACGGCC	0.6	83	0.714
23	CCTCCGGCGGACTGGGTGGC	0.8	83	0.802
24	CATTAACCAGGGCTTCGGGC	0.6	83	0.828
25	CCGGCCACCCAGTCCGCCGG	0.85	100	0.332
26	AGCGACACATACCGGCGCCC	0.7	100	0.801
27	TTGAAACTCAGTTTGCGGCG	0.5	100	0.96
28	CAGAAACGATCACGATGATT	0.4	17	0.09
29	TTCGGCGGTGCCATTAACCA	0.55	33	0.597
30	AACAGATGCTCATCGTGCAC	0.5	67	0.981
31	TCTGTTCATCATCACGCACC	0.5	83	0.958
32	GCTGCTGCTCCTCGAAGATG	0.6	33	0.251
33	CCACAATTGTCGATCGTCAA	0.45	50	0.394
34	TGTGGTGAATGCGGTTCGCC	0.6	67	0.625
35	GAACCGGGCAGCCCGCCTCC	0.8	83	1
36	GTGCACTGTTCCAGGACAAA	0.5	33	0.109
37	TTGGGCTGCTTACAAACTTC	0.45	33	0.298
38	GCGATATAGTTGGAGCCAGC	0.55	83	0.971
39	TATTCGTCACTGTTCCCCGC	0.55	100	0.761
	cDNA
1	CGTGGTACCGAACCTTTTAG
2	GTGGATACGGACCGTGTTAT
3	GGCAATCCCTCGGCTATTTC
4	AAGCCCGTCCGGTTTTTGAT
5	CCGTGTTATACCTGTAGAAA
6	GTCGTCCTACTGGAGAAATA
7	GACGTTGCTCGCTGTGTATG
8	AAGAACTCGTTTACAAAGGA
9	CGTGTTATACCTGTAGAAAC
10	AAGCGTCTCGACGTAATTGG
11	AGCGTCTCGACGTAATTGGT
12	GCGGCCTCCTGAGGCCAAGT
13	ATCAACCGGCGAGGGACTTG
14	GACGCCGCTAGCTTTCCGTT
15	CGACGTAATTGGTCCCGAAG
16	GGGTCAGGCGGCCTCCTGAG
17	AAAACCGGACGGGCTTCGGG
18	GGTTTTTGATGCCGTGCGAG
19	GTTATACCTGTAGAAACCCC
20	GTCCTCGATAATTAAGCGCC
21	CGAGGCCGGTGGGTCAGGCG
22	AATAGCCGAGGGATTGCCGG
23	GGAGGCCGCCTGACCCACCG
24	GTAATTGGTCCCGAAGCCCG
25	GGCCGGTGGGTCAGGCGGCC
26	TCGCTGTGTATGGCCGCGGG
27	AACTTTGAGTCAAACGCCGC
28	GTCTTTGCTAGTGCTACTAA
29	AAGCCGCCACGGTAATTGGT
30	TTGTCTACGAGTAGCACGTG
31	AGACAAGTAGTAGTGCGTGG
32	CGACGACGAGGAGCTTCTAC
33	GGTGTTAACAGCTAGCAGTT
34	ACACCACTTACGCCAAGCGG
35	CTTGGCCCGTCGGGCGGAGG
36	CACGTGACAAGGTCCTGTTT
37	AACCCGACGAATGTTTGAAG
38	CGCTATATCAACCTCGGTCG
39	ATAAGCAGTGACAAGGGGCG

## Sheet: S1D
Supplemental Table S1D: Sequence, GC content and cleavage efficiency of sgRNA designed inGraf et al., 2019
#	sgRNA Target Sequence	GC (%)	Efficiency in %
1	GAGGCGTCATCGATGACCGA	0.6	0.57
2	GAGGCGTCATCGATGACCGT	0.6	0.47
3	GAGGCGTCATCGATGACCGG	0.65	0.66
4	GAGGCGTCATCGATGACCGC	0.65	0.31
5	GAGGCGTCATCGATGATTGG	0.55	0.66
6	GAGGCGTCATCGATGATGTG	0.55	0.7
7	GAGGCGTCATCGATGAGGTG	0.6	0.66
8	GAGGCGTCATCGATGACTTA	0.5	0.07
9	GAGGCGTCATCGATGACCTT	0.55	0.13
10	GAGGCGTCATCGATGATTTT	0.45	0.004
11	GAGGCGTCATCGATGATTTG	0.5	0.11
12	GAGGCGTCATCGATGATTTC	0.5	0.01
13	GAGGCGTCATCGATGATTTA	0.45	0.02
14	GAGGCGTCATCGATGACTTT	0.5	0.01
15	GAGGCGTCATCGATGATCTC	0.55	0.09
16	GAGGCGTCATCGATGAGCCA	0.6	0.53
17	GAGGCGTCATCGATGAGCCG	0.65	0.43
18	GAGGCGTCATCGATGAGCCC	0.65	0.53
19	GAGGCGTCATCGATGAGCCT	0.6	0.09
20	GAGGCGTCATCGATGAGGCC	0.65	0.11
21	GAGGCGTCATCGATGATGCC	0.6	0.11
22	GAGGCGTCATCGATGAGTCC	0.6	0.29
	cDNA
1	CTCCGCAGTAGCTACTGGCT
2	CTCCGCAGTAGCTACTGGCA
3	CTCCGCAGTAGCTACTGGCC
4	CTCCGCAGTAGCTACTGGCG
5	CTCCGCAGTAGCTACTAACC
6	CTCCGCAGTAGCTACTACAC
7	CTCCGCAGTAGCTACTCCAC
8	CTCCGCAGTAGCTACTGAAT
9	CTCCGCAGTAGCTACTGGAA
10	CTCCGCAGTAGCTACTAAAA
11	CTCCGCAGTAGCTACTAAAC
12	CTCCGCAGTAGCTACTAAAG
13	CTCCGCAGTAGCTACTAAAT
14	CTCCGCAGTAGCTACTGAAA
15	CTCCGCAGTAGCTACTAGAG
16	CTCCGCAGTAGCTACTCGGT
17	CTCCGCAGTAGCTACTCGGC
18	CTCCGCAGTAGCTACTCGGG
19	CTCCGCAGTAGCTACTCGGA
20	CTCCGCAGTAGCTACTCCGG
21	CTCCGCAGTAGCTACTACGG
22	CTCCGCAGTAGCTACTCAGG
